# Supplementary material for: Transcriptional Dynamics of Hair-Bundle Morphogenesis Revealed with CellTrails
Source: PubMed Central journal article supplement — Cell Rep. Author manuscript; Available in PMC 2018 Aug 13. (PMC6089258; doi:10.1016/j.celrep.2018.05.002), 2018-06-05
Supplement: NIHMS976316-supplement-5.pdf [file NIHMS976316-supplement-5.pdf]

## Transcriptional Dynamics of Hair-Bundle Morphogenesis Revealed with CellTrails

### Graphical Abstract

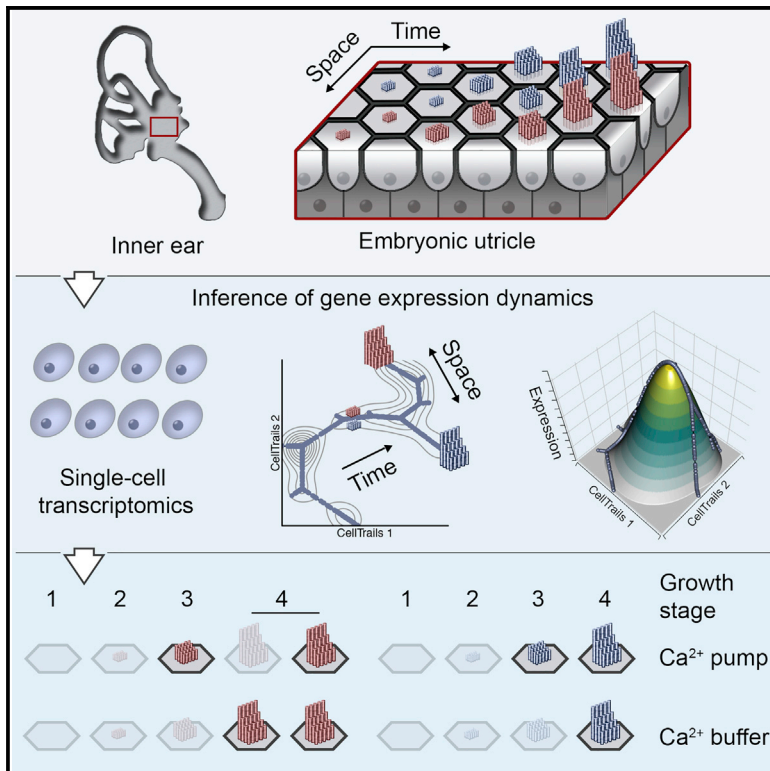

### Authors

Daniel C. Ellwanger, Mirko Scheibinger, Rachel A. Dumont, Peter G. Barr-Gillespie, Stefan Heller

### Correspondence

gillespp@ohsu.edu (P.G.B.-G.), hellers@stanford.edu (S.H.)

### In Brief

Ordering single cells along branching trajectories using transcriptomic data is bioinformatically challenging. Ellwanger et al. developed CellTrails and applied this tool to showcase the bifurcating sequence of gene expression as sensory hair cells develop into different subtypes that feature spatially distinct morphologies of the mechanosensitive hair bundle.

### Highlights

- Tool for computation, visualization, and analysis of branching cellular trajectories
- Developmental sequences of sensory hair-cell subtype-specific gene expression
- Regulation of local  $[Ca^{2+}]_i$  during stereocilia growth
- Distinct subtypes of type II utricular sensory hair cells

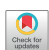

# Transcriptional Dynamics of Hair-Bundle Morphogenesis Revealed with CellTrails

Daniel C. Ellwanger,<sup>1</sup> Mirko Scheibinger,<sup>1</sup> Rachel A. Dumont,<sup>2</sup> Peter G. Barr-Gillespie,<sup>2,\*</sup> and Stefan Heller<sup>1,3,\*</sup>

<sup>1</sup>Department of Otolaryngology, Head & Neck Surgery and Institute for Stem Cell Biology and Regenerative Medicine, Stanford University School of Medicine, Stanford, CA 94305, USA

<sup>2</sup>Oregon Hearing Research Center and Vollum Institute, Oregon Health & Science University, Portland, OR 97239, USA

<sup>3</sup>Lead Contact

\*Correspondence: [gillespp@ohsu.edu](mailto:gillespp@ohsu.edu) (P.G.B.-G.), [hellers@stanford.edu](mailto:hellers@stanford.edu) (S.H.)

<https://doi.org/10.1016/j.celrep.2018.05.002>

## SUMMARY

Protruding from the apical surface of inner ear sensory cells, hair bundles carry out mechanotransduction. Bundle growth involves sequential and overlapping cellular processes, which are concealed within gene expression profiles of individual cells. To dissect such processes, we developed CellTrails, a tool for uncovering, analyzing, and visualizing single-cell gene-expression dynamics. Utilizing quantitative gene-expression data for key bundle proteins from single cells of the developing chick utricle, we reconstructed *de novo* a bifurcating trajectory that spanned from progenitor cells to mature striolar and extrastriolar hair cells. Extraction and alignment of developmental trails and association of pseudotime with bundle length measurements linked expression dynamics of individual genes with bundle growth stages. Differential trail analysis revealed high-resolution dynamics of transcripts that control striolar and extrastriolar bundle development, including those that encode proteins that regulate  $[Ca^{2+}]_i$  or mediate crosslinking and lengthening of actin filaments.

## INTRODUCTION

Hair bundles are the mechanosensitive organelles of sensory hair cells, which mediate the mechanical-to-electrical transduction that is at the heart of hearing and balance (Gillespie and Müller, 2009). The actin-filled stereocilia comprising a bundle are arranged in ranks of increasing height, producing an asymmetrical morphology that specifies the axis of physiological sensitivity—mechanotransduction channels open when a bundle is moved toward its tallest stereocilia and close when moved in the opposite direction (Fettiplace and Kim, 2014). Bundle structure therefore fundamentally underlies hair-cell function.

The morphological steps that occur during hair-bundle development (Tilney et al., 1992a) are evolutionarily conserved (Barr-Gillespie, 2015), yet underlying molecular changes are only sparsely known, mostly through identification of “deafness

genes” (Barr-Gillespie, 2015; Drummond et al., 2012). Nevertheless, such identification is insufficient to catalog the proteins essential for bundle assembly, as some proteins may be essential for embryonic survival or are compensated for by a close paralog. Many of these additional proteins are likely present in mass-spectrometry analyses of the bundle’s proteome (Krey et al., 2015; Shin et al., 2013; Wilmarth et al., 2015). Inventorying molecules that participate in hair-bundle assembly is the first step toward developing a mechanistic understanding of this process (Pollard, 2014), and the available deafness gene and proteomics compilations provide the foundation to build upon.

The next step in characterizing hair-bundle development is to understand when each molecule is expressed by hair cells, as this sequence dictates the assembly process. Using single-cell analysis, we describe here the spatial and temporal expression of key hair-bundle transcripts. The full spectrum of developing and mature cell types exists in a single snapshot of an asynchronously developing organ, such as the chick utricle at embryonic day (E) 15 (Goodyear et al., 1999). In addition to developmental differences among cells, the utricle also shows regional variation in cell organization and structure, containing at least three types of hair cells (Figures 1A and 1B). The striola primarily contains type I hair cells, enveloped by afferent calyces, as well as a few striolar type II hair cells, which are centrally located at the line of hair-bundle polarity reversal and are contacted by synaptic boutons. Both striolar hair cell types display relatively short hair bundles with thick stereocilia; by contrast, extrastriolar type II hair cells—also contacted by synaptic boutons—have long hair bundles with thin stereocilia. Although type, location, and developmental age of individual cells are not preserved during single-cell sampling, we hypothesized that their transcriptional profiles encode this information. We therefore devised an algorithm, CellTrails, to determine the dynamically changing cellular states of a branching trajectory of utricle hair cells during bundle assembly. By using spectral decomposition of a robust cell-cell association index, CellTrails embeds the transcriptional profiles of cells into a low-dimensional representation—a manifold—that best characterizes the data. *In situ* hybridization and immunolabeling confirmed the predicted spatial information as well as transcription dynamics. Moreover, the precise temporal ordering of cells and accompanying expression changes in individual genes were robustly correlated with stereocilia elongation, which we utilized as an *in situ* ruler for developmental progression. CellTrails’ spatiotemporal mapping

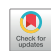

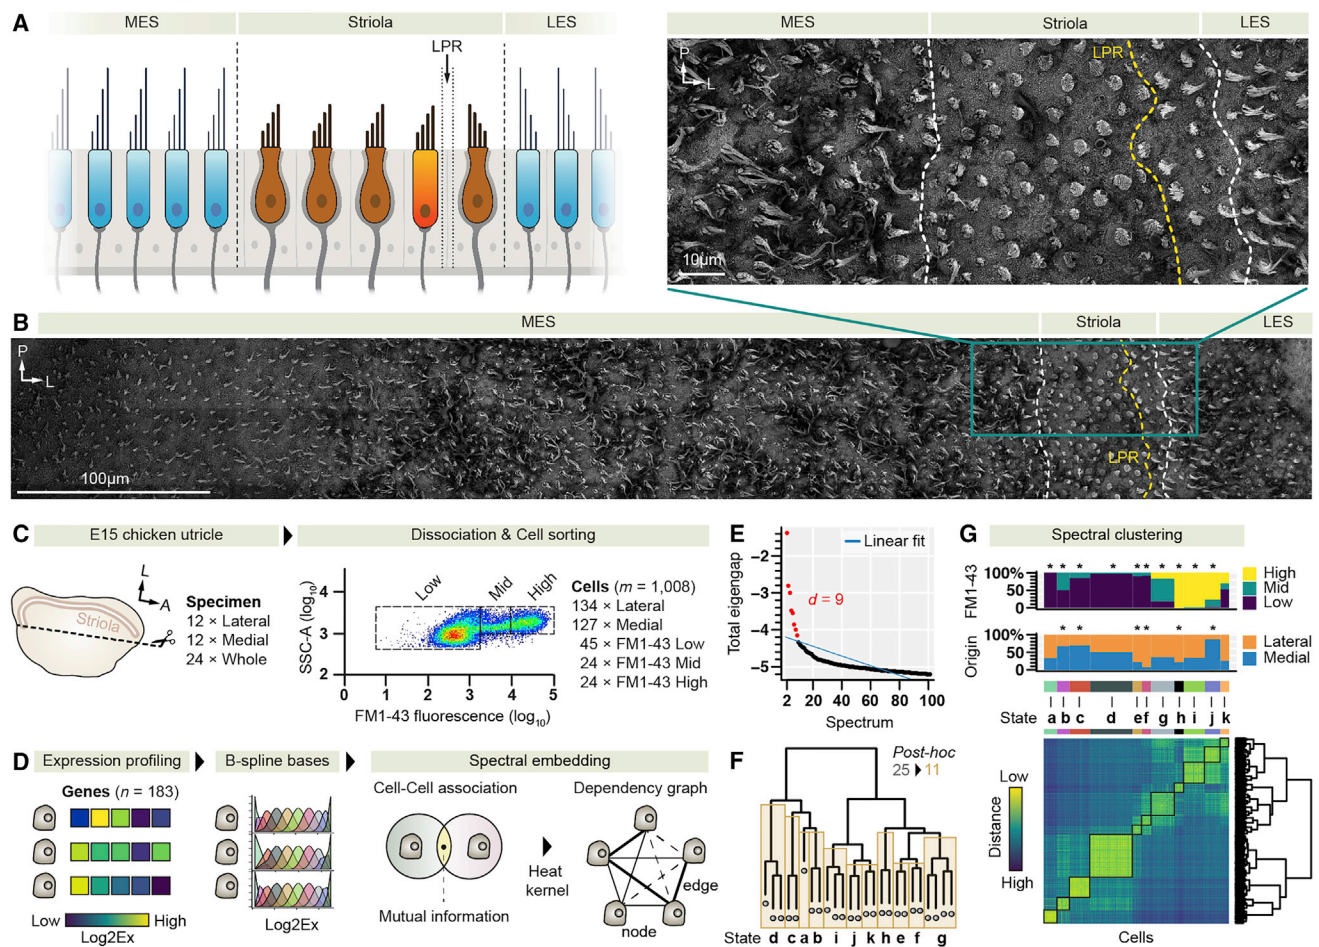

**Figure 1. Uncovering Spatiotemporal States of Bundle Development**

(A) Cytomorphological features of hair cells in medial and lateral extrastriolar (MES, LES) regions and in the striola. The line of polarity reversal (LPR) is indicated. We only show one example of striolar type II hair cells (bright orange), which are found on both sides of the LPR. The drawing was inspired by Jorgensen (1989). (B) Top-down scanning electron microscopy (SEM) view of a medial-to-lateral stripe of the E15 chicken utricle; the enlarged inset shows the distinct hair-bundle shapes of cells in striolar and extrastriolar regions. A high-resolution version of the SEM data file is available at Mendeley Data (<https://doi.org/10.17632/yy3c72972w.1>). (C) Isolation of cells from chicken utricles. 261 cells were sampled exclusively from either the lateral or the medial half. The fluorescence-activated cell sorting (FACS) plot shows the range of FM1-43 uptake. Rectangles delineate metadata labels; SSC-A, side scatter area. (D) Lower-dimensional manifold learning. Fuzzy mutual information-based affinity scores were used to define edge weights of a complete graph with a cell at each node. Spectral decomposition of the graph was performed to unfold the manifold. (E) Subspace dimensionality. Linear regression to the total eigengap values of the spectral embedding revealed nine relevant dimensions. (F) Spectral clustering. The dendrogram displays the relationship between 25 clusters (leaf nodes) with at least 1% of cells in each. If the null hypothesis of a post hoc test on differential gene expression was accepted, siblings were iteratively merged, resulting in the 11 highlighted states. (G) Spatiotemporal information. Bottom: the cell-to-cell distance matrix ( $L^2$ -norm) in the low-dimensional space, which was used to compute initial clusters and their relationship (dendrogram). Top: the relative distribution of FM1-43-gated cells and cells with known spatial origin per determined state; \* $p < 10^{-3}$  by imputed Fisher test.

revealed gene-expression dynamics that specified unique stereocilia dimensions for striolar and extrastriolar hair cells and provided evidence for two distinct classes of extrastriolar type II hair cells.

We further established a strategy for the alignment of extracted linear trajectories (trails), which allows comparison of gene expression dynamics as different hair-bundle types develop. Examining genes involved in hair-bundle development, which includes the processes of lengthening, widening, tapering,

actin-crosslinking, transport, and transduction, we found that the  $Ca^{2+}$  regulators *CALB2* (calretinin) and *ATP2B2* (PMCA2) are dynamically regulated during stereocilia growth in different hair cell types. Precise spatiotemporal control of  $[Ca^{2+}]_i$  consequently appears to be an important component of hair-bundle development.

Our analysis provides insight into spatial, temporal, and cytomorphological aspects of hair-bundle development at high resolution. Utilizing a concept of uncovering and visualizing latent



spatiotemporal information from single-cell gene-expression data, CellTrails performs as well with RNA-seq data as it does with single-cell multiplex qRT-PCR data.

## RESULTS

### Transcriptional Profiling of Chicken Vestibular Cells

To determine gene expression patterns during hair-bundle development, we chose 183 genes associated with bundle structure, function, and development (Ku et al., 2014; Shin et al., 2013; Van Camp and Smith, 2017) (Table S1A). We obtained multiplex qRT-PCR transcriptional profiles of 1,008 single epithelial cells from chicken utricles at E15, when cells of all developmental stages are present (Goodyear et al., 1999) (Figure S1; Table S1B). We generated metadata by sampling cells either from the lateral region of the utricle (134 cells), which includes the striola, or from the medial extrastriolar (MES) side of the utricle (127 cells; Figure 1C). Further, we briefly exposed other utricles to FM1–43 and isolated 93 cells for which we recorded the level of uptake of the styryl dye; a high level of FM1–43 fluorescence is indicative of a functional mechanoelectrical transduction apparatus (Gale et al., 2001).

### Spectral Embedding Reveals Latent Spatiotemporal Information

We hypothesized that the expression profiles of the 1,008 cells represent indirect measurements of underlying spatiotemporal features of each cell. By proper learning of a low-dimensional manifold, we expected to reveal this latent information and to reduce noise by removing irrelevant or highly correlated variables. We employed the geometrically motivated concept of nonlinear spectral embedding (Figure 1D) (Belkin and Niyogi, 2003; Sussman et al., 2012). Due to its locality-preserving character, this technique is advantageous because it is insensitive to outliers and noise, is not susceptible to short-circuiting, and emphasizes naturally occurring clusters in the data. The data's manifold structure was represented by a simple graph connecting cells by edges, which were weighted by a cell-cell similarity score derived from fuzzy mutual information (Daub et al., 2004). Spectral decomposition of this graph revealed nine intrinsic dimensions (Figure 1E). By using hierarchical clustering in the derived latent space, combined with an unsupervised post hoc analysis of gene expression patterns, we identified 11 cellular subgroups (Figure 1F) that were characterized by distinct sets of marker genes (Figures S2A–S2L; Table S1C). Individual clusters displayed significant associations with cells from specific spatial origins and functional mechanotransduction (Figure 1G). Two supersets were evident, based on FM1–43 dye-loading capacity: non-hair cells (states *a–f*) and hair cells (states *g–k*). The three groups harboring most cells with high FM1–43 fluorescence (*h, i, j*) likely represent mature hair cell states. Two states (*g, k*) are composed of cells with low, middle, and high FM1–43 signals and presumably represent intermediate developmental stages. The mature state *h* mostly consists of cells sampled from the lateral region of the utricle (imputed odds ratio [OR] = 3.3). Conversely, state *j* represents cells isolated from the medial region of the utricle (imputed OR = 9.2).

Our unsupervised approach thus revealed cell groups that represent developmentally and spatially distinct populations.

### Robust Reconstruction of a Branching Trajectory

To delineate trajectories that resemble discrete—and possibly bifurcating—developmental continua, we aimed to place cells along a maximum-parsimony tree. Its structure was determined by linking adjacent states that share the highest number of neighboring cells (maximum interface tree; Figures 2A and 2B). We found that state *c* is composed of cells outlying the hair-bundle development trajectory; it also had a nonspecific set of expression markers (Table S1C), the lowest number of genes detected overall, and consequently was left indeterminate. The remaining states (896 cells) formed a trajectory with three terminal (*a, h, j*) and seven internal states, of which state *g* designated a branch point. Notably, this state held the largest fraction of marker genes ( $n = 42$ ), indicating that our assay captured crucial transcripts required for the transition to distinct mature cell types.

Next, we projected cells on the trajectory fitted by straight lines passing through the geometric median (Bedall and Zimmermann, 1979) of adjacent states (Figure 2C). Comparing the actual residuals against a null distribution generated by random sampling of state centers indicated that we achieved a good approximation of the cell order represented by the lower-dimensional manifold (Kolmogorov-Smirnov test  $p < 5 \times 10^{-3}$ ; Figure 2D). The distance between consecutive cells along the fitted trajectory can be interpreted as a function of time. As the actual timescale is unknown, we derived pseudotime by calculating the geodesic distance between cells (Figure 2E). Our resulting model describes cellular differentiation by temporally ordering single cells. Here, each cell can be portrayed as a step on a transitional journey through a high-dimensional landscape. Cells can be visualized on a map-like ordination of the whole trajectory in which gene expression can be shown as a fitted surface topology, which we refer to as CellTrails maps (Table S2A).

Finally, we tested whether our result is robust by computing the pseudotemporal ordering on bootstrap samples (Haghverdi et al., 2016). We observed a high self-concordance among pseudotime predictions for reduced samples of size 75% (median Kendall's  $\tau = 0.92$ ) and 50% of all cells (median  $\tau = 0.90$ ; Figure 2F). This result suggests that cell populations that were identifiable by the assay were reasonably oversampled; using the negative binomial distribution, we estimated that the probability of observing at least 10 cells from each state for a sample size of 448 cells (50% of total count) is 99.9%.

### Expression Maps Visualize Cell Differentiation toward Spatially Distinct Hair Cell Groups

CellTrails maps revealed a trajectory toward distinct spatial locations (Figure 3A) with a discrete FM1–43 uptake gradient (Figure 3B). We found 12 and 22 genes differentially upregulated in the laterally and medially associated terminal hair cell states *h* (51 cells) and *i* (115 cells), respectively (Figures S2I and S2J; Table S1C). Indeed, state *h* markers *LOXHD1*, *ATP2B2*, *TMC2*, and *TNMC2* were confirmed to be high in striolar hair cells when compared with surrounding extrastriolar regions (Figure 3C). Most striolar hair cells had high *LOXHD1* mRNA levels,



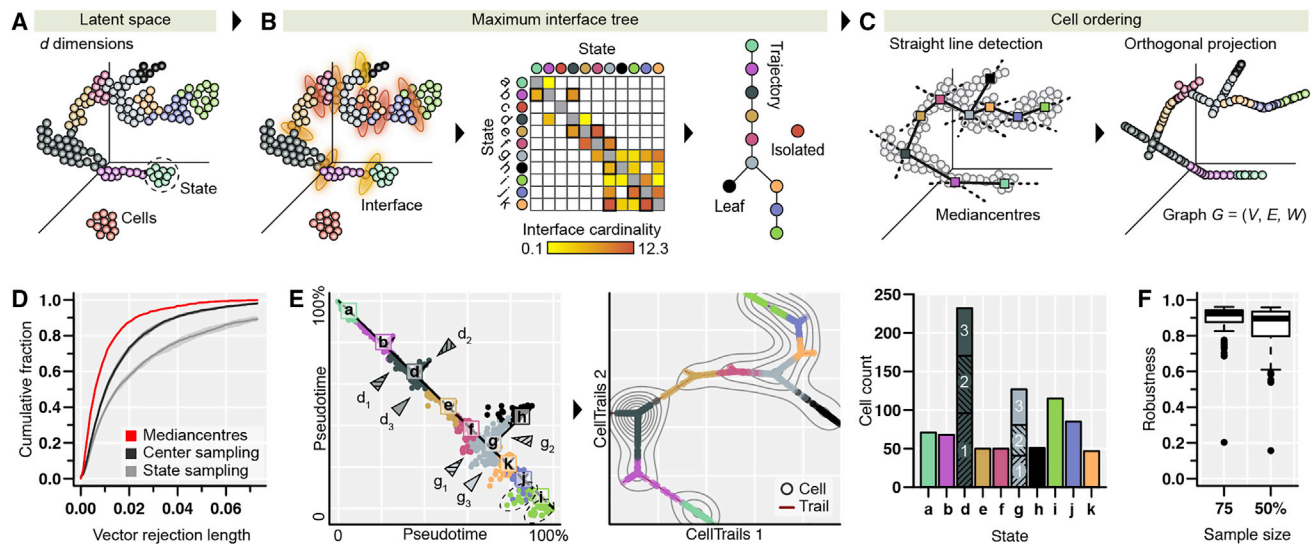

**Figure 2. Reconstructing a Branching Trajectory toward Bundle Maturation**

(A–C) Algorithm outline. (A) Input data are single cells represented in the low-dimensional space and their state membership. (B) Geometric proximity of states is estimated using the  $k$ -nearest neighbor information of their members. Interface cardinalities of a given state are defined as the percentage of nearest neighbors from each state. A state is defined as isolated if all of its nearest neighboring cells are members of itself; the state tree is computed maximizing the total interface cardinality. (C) Straight lines are fitted through the mediancenters of adjacent states. Single cells are orthogonally projected onto the closest line passing through their assigned states. A weighted acyclic trajectory graph  $G$  is constructed by connecting cells accordingly to their ordering along the fitted lines. (D) Goodness of fit. Shown is the cumulative distribution of the absolute residuals of the trajectory fit (i.e., the vector rejection length of the orthogonal projection) using mediancenters, randomized state centers, or random state assignments. Shaded areas indicate the 95% confidence interval of the median. (E) Inferred trajectory graph. Left: the cells' geodesic distance (or pseudotime) from the endpoints of the longest path in the trajectory graph; the perpendicular dispersion is proportional to the distance of the cell from the predicted trajectory (black line) in the low-dimensional space and reflects the stochasticity of state equilibria. Bifurcations define the substates  $d_{1-3}$  and  $g_{1-3}$ ; two groups with high variation in state  $i$  are indicated with dotted ellipses. Center: the trajectory graph (red line). Distances between adjacent cells correlate with pseudotime. Contours (gray lines) represent the cell density along the trajectory. Right: the total cell count per state and substate ( $d_{1-3}$ ,  $g_{1-3}$ ). (F) Robustness analysis. High self-concordance of reconstructed trajectories for bootstrap samples of 75% and 50% of cells. Box plots show the interquartile range (IQR), whiskers extend to the most extreme data point, which is no more than  $1.5 \times$  IQR from the upper and lower quartile; outliers are indicated.

but a more central subset, near the expected line of hair-bundle polarity reversal (Figure 1A), had reduced *LOXHD1* levels. *TMC2* mRNA expression was uniformly strong in all striolar hair cells. CellTrails maps revealed that *LOXHD1*, *ATP2B2*, and *TNNC2* expression was highest toward the terminus associated with laterally originating cells, which includes striolar cells (Figure 3A). We suggest that the striolar branch mostly contains type I hair cells, and that the relatively few striolar type II hair cells are distributed along the same branch but absent from the terminus.

Conversely, *SKOR2* and *SYN3* transcripts were more abundant in extrastriolar hair cells, which are invariably type II (Figure 3D). *CALB2* mRNA was abundant in extrastriolar hair cells, whereas in the striola we found hair cells with strong or moderate expression, which corroborates the predicted distribution shown in the corresponding CellTrails map (Figure 3E).

The striola and extrastriola trails bifurcate from a common path tracing back to state  $d$ , which consists of the largest fraction of cells (Figure 2E). Based on the expression of assayed supporting cell markers (*OTOA*, *TECTA*), we hypothesize that state  $d$  cells are a progenitor population. This state also forks. The shorter branch ( $d_2$  in Figure 2E) represents a subgroup of 74 cells; based on our metadata (OR of lateral location = 4.5) and branch-specific expression of *TECTB*, those 74 cells originated from the striola (Figure 3F).

We observed known (*ATOH1*, *POU4F3*) and novel (e.g., *KIAA1549*, *KLHDC7A*) markers of nascent hair cells; these markers peaked prior to maturation along the path originating in state  $d$  (Figure 3G, Tables S1C and S2A).

Overall, CellTrails reconstructed a differentiation trajectory from presumptive hair cell progenitor cells via nascent hair cells and immature stages toward distinct striolar and extrastriolar phenotypes. The underlying leitmotif for the hair cell branches of the trajectory is likely linked to hair-bundle shapes, which differ in striolar and extrastriolar locations.

### Hair-Bundle Growth Correlates with Expression Peaks of $[Ca^{2+}]_i$ Regulators

CellTrails' expression maps allowed us to draw several conclusions about the bifurcating trails that end with mature cell groups of states  $h$  and  $i$  (Figure 4A). Trail S (striola, TrS) consists of 283 cells from states  $d_3$ ,  $e$ ,  $f$ ,  $g_1$ ,  $g_2$ , and  $h$ ; trail ES (extrastriola, TrES) harbors 470 cells representing states  $d_3$ ,  $e$ ,  $f$ ,  $g_1$ ,  $g_3$ ,  $k$ ,  $j$ , and  $i$  (Figure 2E). Owing to the limited number of genes assayed, the first 192 cells of both trails are shared. The location of the bifurcation depends on differential expression levels of the assayed genes; in this context, we conclude that the trajectory branches into cells with short hair bundles displaying thick stereocilia (TrS) and into cells that have long and thin stereocilia (TrES). We

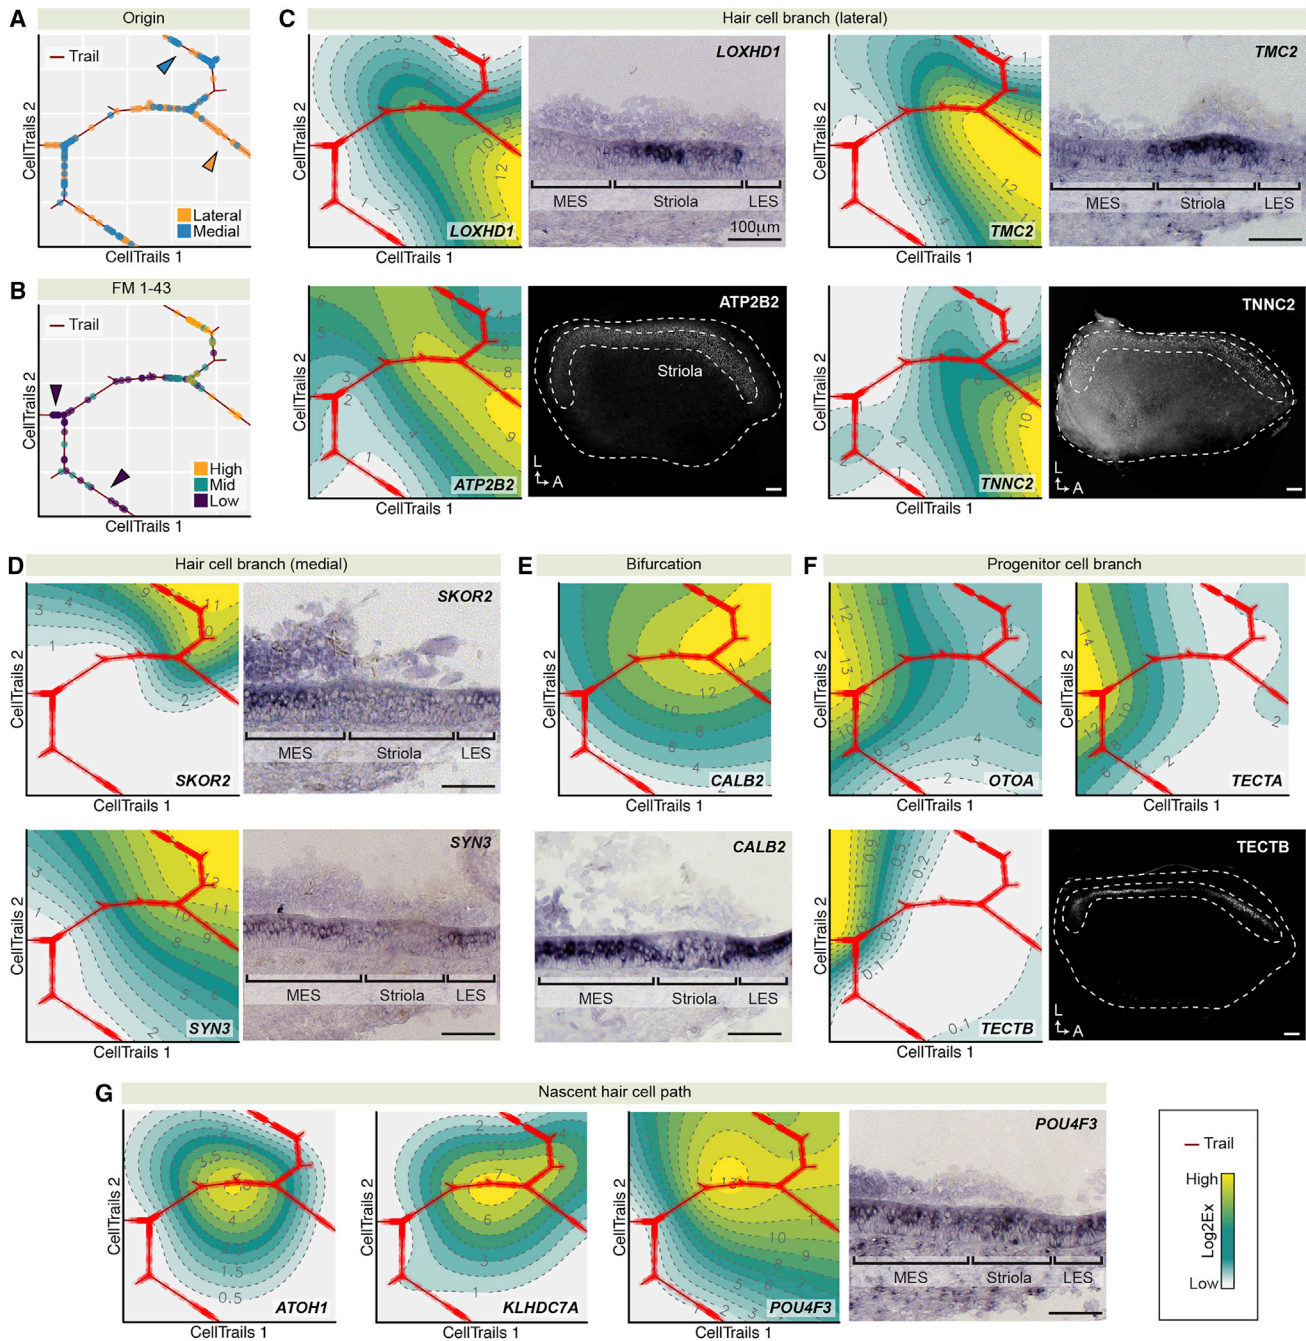

**Figure 3. Visualizing Metadata and Gene Expression with CellTrails Maps**

(A) Cell origin metadata. Cells from lateral utricle preparations, which contained striolar cells (orange dots), distinctively accumulated along one of the two terminal branches of the CellTrails map (orange arrowhead; Fisher test  $p < 6 \times 10^{-5}$ ). Cells from medial utricle preparations, which should not contain striolar cells, were more strongly associated with the other terminal branch (blue arrowhead;  $p < 3 \times 10^{-3}$ ). Cells without collected metadata are not shown.

(B) FM1-43 uptake metadata. Two hair cell branches with high FM1-43 uptake can be identified; cells labeled with medium FM1-43 intensity are found along the path leading to the bifurcation, and low FM1-43 cells are enriched at the remaining two major branches (purple arrowheads).

(C) CellTrails maps project high expression of *LOXHD1*, *TMC2*, *ATP2B2*, and *TNNC2* along the lateral-associated hair cell branch of the utricle. *In situ* hybridization on E15 chicken utricle cross-sections and whole-mount immunolabeling validated RNA or protein expression of these genes in striolar hair cells.

(D) *SKOR2* and *SYN3* expression is associated with hair cells located along the medial-associated branch; *in situ* hybridization revealed corresponding transcripts in extrastriolar hair cells.

(E) The spatiotemporal projection of high *CALB2* gene expression at the bifurcation and the medial-associated branch was confirmed by *in situ* hybridization; *CALB2* RNA was detected in extrastriolar and in scattered striolar cells.

(legend continued on next page)

therefore inferred spatial expression dynamics by fitting cellular transcription profiles as a function of pseudotime for each trail individually (Table S2B).

*CALB2* transcripts were upregulated along TrES, concurrent with the onset of hair cell differentiation and culminating in a local maximum at state *k* (Figure 4B). After its peak, *CALB2* declines but maintains a 3.7-fold higher (Log2Ex) mRNA level in mature hair cells relative to the trail start (at  $t = 0$ ). We observed a similar transient transcription peak in TrS, where the drop is steeper (0.2-fold higher compared to  $t = 0$ ; 3.6-fold lower mRNA expression than TrES; Table S2B). Because the E15 utricle harbors all bundle-development stages (Figure 4C), we hypothesized that we could validate the inferred expression profile by correlating protein measurements from individual hair cells with bundle heights. We quantified bundle height, defined by the length of the tallest stereocilium, and *CALB2* immunofluorescence intensity in extrastricular hair cells. The agreement between transcript and protein level profiles over developmental time was striking: hair cells with short bundles displayed low *CALB2* protein levels, cells with medium-sized bundles had the highest levels, and levels were reduced in cells with the tallest bundles (Figures 4D, 4E, and S3A). This observation suggested that we could translate CellTrails' pseudotime to actual bundle length.

We computed a nonlinear alignment of the fitted *CALB2* protein expression curve with the *CALB2* transcription dynamics along TrES (Figure 4F). Bundles with the shortest heights aligned with the transient peak of the transcription factor *ATOH1*, which is essential for hair cell development (Bermingham et al., 1999). Likewise, in developing extrastricular type II hair cells along TrES, mRNA encoding the stereocilia calcium pump *ATP2B2* (Dumont et al., 2001) displayed a prominent peak coincident with short bundle lengths; this peak preceded the *CALB2* peak (Figures 4G, 4I, and S3B). In contrast, in maturing striolar hair cells along TrS, *ATP2B2* mRNA and protein expression exhibited logistic growth (Figures S3B and S4A–S4C).

The transient dynamics of  $[Ca^{2+}]_i$  regulators along TrES suggest that local maxima correlate with distinct hair-bundle growth phases. Tilney et al. (1992b) reported four prototypical stages of developing bundles: 1 = pre-growth before visible bundle formation; 2 = initial growth; 3 = widening; 4 = secondary growth. We noticed that the distribution of extrastricular bundle lengths at E15 was not uniform (Kolmogorov-Smirnov test for equality  $p < 3 \times 10^{-14}$ ; Figure 4J). Assuming that growth stages 2 to 4 represent normally distributed subpopulations, we found that the bundle length distribution can be well described by a Gaussian mixture model with three components (test for equality  $p = 0.82$ ). Stage 2 peaks at 3.0  $\mu\text{m}$ , stage 3 at 5.8  $\mu\text{m}$ , and stage 4 at 10.8  $\mu\text{m}$ . The model also meets the biological assumption that longer bundles are more likely observed than shorter ones at E15 because mature hair cells accumulate over time (Goodyear et al., 1999); the mixing proportions increased by growth stage ( $p_2 = 0.1$ ,  $p_3 = 0.2$ ,  $p_4 = 0.7$ ). We found that the *ATP2B2* protein expression peaked during stage 3, whereas the highest level of

*CALB2* protein coincided with the onset of the secondary growth (stage 4). The growing bundle thus requires distinct, temporally coordinated mechanisms to control  $[Ca^{2+}]_i$ .

### Two Classes of Type II Extrastricular Hair Cells

*ATP2B2* transcript and protein levels rebounded toward the end of TrES (Figures 4G and 4H). The lower-dimensional manifold suggested that two mature cellular populations are present along TrES; trajectory fit residuals of state *i* indicated two state equilibria (Figure 2E) for which the cell groups, both containing mature cells as indicated by high FM1–43 uptake (Figure 3B), were separated by a significant leap in pseudotime (Figure S4E). Indeed, a subset of extrastricular hair cells, those with the tallest hair bundles, displayed strong *ATP2B2* immunofluorescence (Figures 4H, 4I, and S3B), suggesting that a distinct class of type II hair cells arises late along TrES. We suggest that two trails overlap at the TrES branch (Figure 4K) and therefore introduce an additional terminal end at the pseudotime leap (TrES\*). While branching trails (e.g., TrS and TrES) are induced by differential gene regulation, sequential terminal ends denote that expression time series data of one developmental process is a subset of another (i.e., TrES\* is a subset of TrES).

The resulting trails TrES and TrES\* exhibit the same transient *ATP2B2* expression peak before the bifurcation. *ATP2B2* remains low toward the end of TrES\*, which represents the mature state of the majority of extrastricular cells in the utricle. We also found that *CCDC50*, *MYO1H*, *TMC2*, and *TNNC2* were significantly elevated at the terminal end of trail TrES compared to TrES\* (Log2Ex fold change  $>2.5$ , Peto-Peto test  $p < 10^{-3}$ ; Figure S4D); those genes were most highly expressed at the terminal end of TrS, suggesting that they carry out functions in terminal TrES cells that are related to their functions in striolar hair bundles. The terminal ends of TrES and TrES\* diverge from TrS by 17 genes (including *CALB2*) that are differentially expressed.

Observing the discovered type II extrastricular hair cell subclasses in older utricles would demonstrate that they are stable cell types. We pooled an additional 354 posthatch (P) utricle cells with the E15 cells and recomputed the lower-dimensional manifold. The cellular location in the latent space met the expected shift from young/developing hair cells toward mature hair cells, revealed by accumulation of posthatch cells at the terminal ends of the hair cell trajectory (Figure S4F). Here, posthatch cells with high *ATP2B2* levels emerged at the tail of TrES, corroborating our observations at E15. Finally, examination of *ATP2B2* protein levels in the P7 utricle confirmed the presence of two classes of extrastricular type II hair cells (Figure 4L).

### Orchestration of Gene Expression during Hair-Bundle Assembly

CellTrails revealed transcriptional dynamics with high resolution. However, since pseudotime is a function of transcriptional change, its axis may be distorted, making comparison of trails

(F) Expression of supporting cell marker genes designates the progenitor cell pool located at the left side of the CellTrails maps. High *TECTB* expression was projected along the left branch within the progenitor population. Immunolabeling identified a subgroup of supporting cells located in the striola.

(G) Transient peaks of *ATOH1*, *KLHDC7A*, and *POU4F3* mark the nascent hair cell path between progenitors and the bifurcation toward maturing hair cells. *POU4F3* mRNA was found in scattered extrastricular and striolar cells.



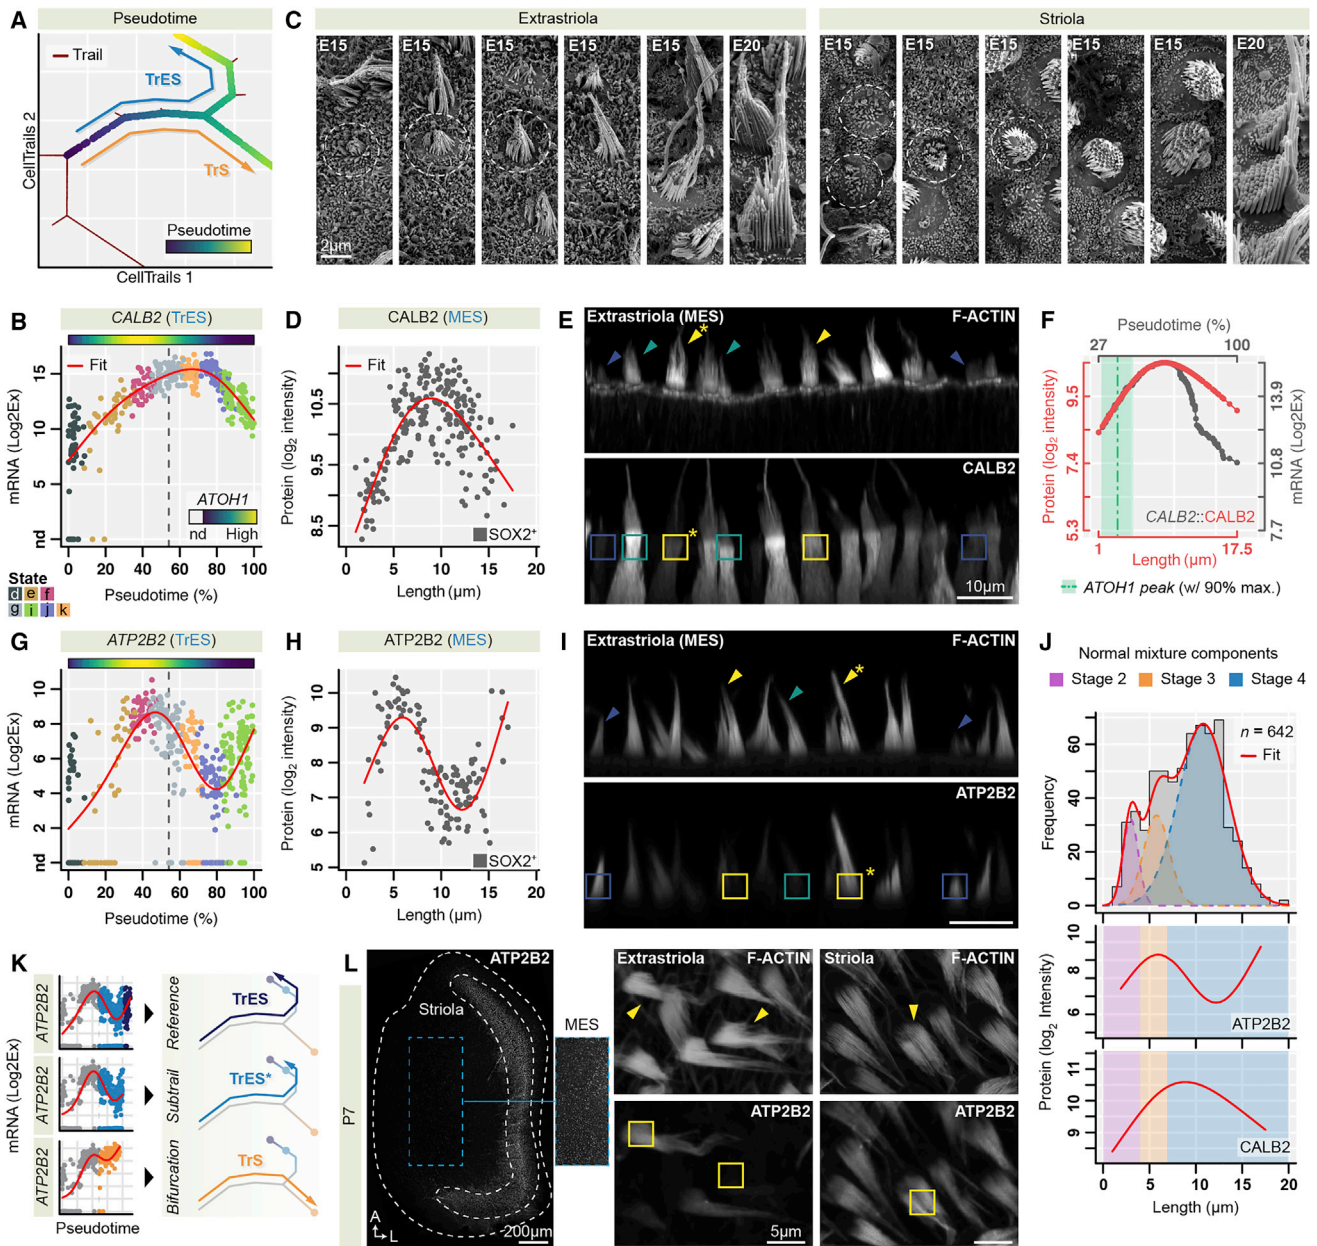

**Figure 4. Inferring Expression Dynamics of Bundle Growth**

(A) CellTrails map indicates the bifurcating trails from progenitors toward mature hair cells (TrS, TrES) and the computed pseudotime, respectively. (B and G) *CALB2* (B) and *ATP2B2* (G) exhibit transient peaks along TrES. Measured transcript levels of each single cell as a function of pseudotime and the inferred expression dynamic (red line) are shown; top bar indicates the corresponding *ATOH1* dynamic, vertical dotted line depicts the bifurcation; single cells are color coded by state (*d–g, k, j, i*). (C) SEM images show similar and spatially distinct morphological features of hair-bundle growth in the chicken utricle (dotted circles). (D, E, H, and I) Immunolabeling confirms inferred expression dynamics of *CALB2* and *ATP2B2* in MES. (D and H) Quantification of immunofluorescence as a function of bundle length. These measurements reveal similar transcript and protein expression dynamics (compare to B and G; *n* = 221 for *CALB2*; *n* = 125 for *ATP2B2*); SOX2 immunolabeling confirmed type II hair cell phenotypes. (E and I) Representative examples of *CALB2* and *ATP2B2* levels associated with distinct bundle lengths; short, blue; medium, green; long, yellow; asterisk indicates the tallest bundle. (F) Alignment of extrastriolar *CALB2* protein dynamics (red) with *CALB2* transcriptional expression dynamics (gray) along TrES; the *ATOH1* gene expression peak coincides with the shortest measured hair-bundle lengths. (J) Bundle growth stages. The distribution of bundle lengths sampled from the MES (*n* = 642) followed a Gaussian mixture model with three components. The shaded areas in the upper panel show the individual fitted normal distributions representing stages 2–4 of bundle growth. *ATP2B2* and *CALB2* protein expression peaks coincide with different growth stages as shown in the lower two panels. The shaded areas indicate the bundle length intervals for each growth stage according to the individual probability functions of the Gaussian mixture model.

(legend continued on next page)

challenging. We employed an algorithm from speech recognition, dynamic time warping (DTW; (Sakoe and Chiba, 1978)), to pairwise align trail expression series that are similar but locally out of phase (Figure 5A).

Calculated root-mean-square deviations (RMSD) between warped expression dynamics confirmed the overall similarity of the hair-bundle assembly process of extrastricular types (mean RMSD TrES::TrES\* = 0.16; Table S3A), while significantly differing from striolar bundle maturation (mean RMSD TrES::TrS = 0.49, TrES\*::TrS = 0.44; each Mann-Whitney test  $p < 10^{-13}$ ). We noted that 14 common genes (*AKAP5*, *ATP2B2*, *CAB39L*, *CHRNA10*, *CIB2*, *LOXHD1*, *MYO1H*, *MYO3A*, *OCM*, *SKOR2*, *SLC8A1*, *SYN3*, *TMC2*, and *TNNC2*) showed high discrepancies (Z score >1.65, Figure 5B) between extrastricular and striolar over developmental time, suggesting that they may play distinguishing roles during location-specific bundle growth.

This procedure further allowed us to compare gene expression between hair cell subtypes during hair-bundle assembly. We computed a multiple alignment of all trails by using TrES as common reference. By integrating morphometrics with protein measurements, we were able to model bundle length as a function of pseudotime (Figure 4F). We selected sets of genes responsible for bundle maturation and function (Figures 5C–5H). For example, we found that tight actin crosslinkers are sharply regulated, and their expression peaks are temporally concordant between hair cell types. *FSCN1* is present during early bundle growth stages, while its paralog, *FSCN2*, becomes dominant during secondary growth; *PLS1* follows *ESPN*, which has its highest transcript level during bundle widening. This ordering agrees with previous findings (Avenarius et al., 2014).

As discussed earlier, transcripts for proteins that regulate  $Ca^{2+}$  emerge with distinct time courses (Figure 5G). Moreover, appearance of mechanotransduction transcripts is coordinated, with *PCDH15* preceding *CDH23*; *TMC1*, *LHFPL5*, and *TMIE* appeared together, whereas *TMC2* displayed a transient peak coinciding with other transduction genes and became exclusively expressed in TrS hair cells (Figure 5D).  $PIP_2$  metabolism transcripts appeared at higher levels during the second growth phase of hair-bundle development, with the lipid kinase *PI4KA* and its putative binding partner *EFR3A* expressed earlier than the  $PIP_2$  phosphatase *PTPRQ* (Figure 5E). Ankle-link transcripts *ADGRV1*, *MYO7A*, and *PDZD7* appeared simultaneously with transduction transcripts (Figure 5F), while transcripts that control stereocilia length and width peaked at notably different time points (Figure 5H).

### CellTrails Complements Alternative Trajectory Reconstruction Methods

Our results show that CellTrails maps and the derived expression dynamics accurately predict spatiotemporal information. We

next examined whether recent methods for trajectory inference could corroborate our validated findings (Figure 6A). We found that SLICER (Welch et al., 2016), DPT (Haghverdi et al., 2016), SCUBA (Marco et al., 2014), and Monocle (version 2; (Trapnell et al., 2014)) correctly ordered progenitor, nascent, and mature hair cells, at least according to marker expression and FM1–43 uptake. Notably, SLICER and DPT predicted a non-branching trajectory (SLCR1, DPT1). SLICER chronologically orders mature striolar hair cells prior to designated mature extrastricular hair cells (Figure 6B), while DPT predicts the reverse ordering (i.e., extrastricular to striolar, on a highly compressed temporal axis; Figure 6C). However, our experiments showed that at least two spatially distinct trails exist in the developing utricle (Figures 3, 4C, and S3A–S3F), arguing against a transition between mature hair cell types. SCUBA determined a branching trajectory (SCB1, SCB2; Figures 6D and S6C); similar to SLICER and DPT, the predicted expression dynamics along trail SCB2 suggest a mixture of striolar and extrastricular hair cell development. SCB1, in contrast, does not describe a bona fide maturation process as indicated by the limited FM1–43 uptake, increased *ATOH1* expression at the differentiation endpoint (84% of the *ATOH1* peak size), and general lower transcript levels of hair cell marker genes compared to SCB2. Monocle (version 2) predicted a progression tree toward six different hair cell types (MNCL1–6; Figure S6E). Although MNCL1 and MNCL6 had the highest similarity to CellTrails' TrS and TrES (Figure 6E), Monocle's inferred dynamics did not reveal the transient peak of *CALB2* and instead predicted both a downregulation of *ATP2B2* toward the proximal end of MNCL1 and a nearly monotonic increase of *ATP2B2* along MNCL6. Neither behavior was consistent with our biological experiments. Moreover, while *LOXHD1* was predicted to have a notable peak along MNCL6, *in situ* hybridization did not detect significant *LOXHD1* levels in extrastricular regions (Figure 3C). Thus, although all methods accurately ordered cells by maturity, they were unable to identify the underlying progression toward the spatially distinct hair cell types that CellTrails identified and that we confirmed with biological methods.

### Analysis of Single-Cell RNA-Seq Data from Neonatal Mouse Utricles

To demonstrate CellTrails' generalization to single-cell RNA sequencing (RNA-seq) data, we utilized measurements of 14,313 genes from 120 cells from postnatal day 1 (P1) mouse utricles (Burns et al., 2015). Based on a set of 436 highly variable transcripts (Table S3B), we identified a trajectory with three terminal states (a, c, d) connected by one internal bifurcating state (b) (Figure 7A). Projection of the experiment-associated metadata on the CellTrails map allowed us to define progenitor cells (state a), nascent hair cells (state b), and maturing/mature hair cells (states c and d; Figure 7B). CellTrails maps for specific marker genes validated the assignments (Figures 7C–7G;

(K) Generation of trails illustrated by *ATP2B2* expression. Initially similar, expression levels change toward the maturation of striolar and extrastricular hair cells, splitting at the TrS/TrES bifurcation (dotted line). Extrastricular hair cells have similar dynamics; one subtype (TrES) upregulates *ATP2B2* at the end of its maturation, while the other subtype (TrES\*) maintains a low *ATP2B2* level.

(L) *ATP2B2* immunolabeling of P7 chicken utricles. The MES harbors two types of mature type II hair cell having high and low *ATP2B2* intensity. Striolar type I hair cells displayed long bundles with a uniform strong *ATP2B2* labeling. The dashed blue box in the MES region of the overview image points to the extracted inset depicted with increased intensity levels to illustrate the presence of a subset of *ATP2B2* expressing type II hair cells.

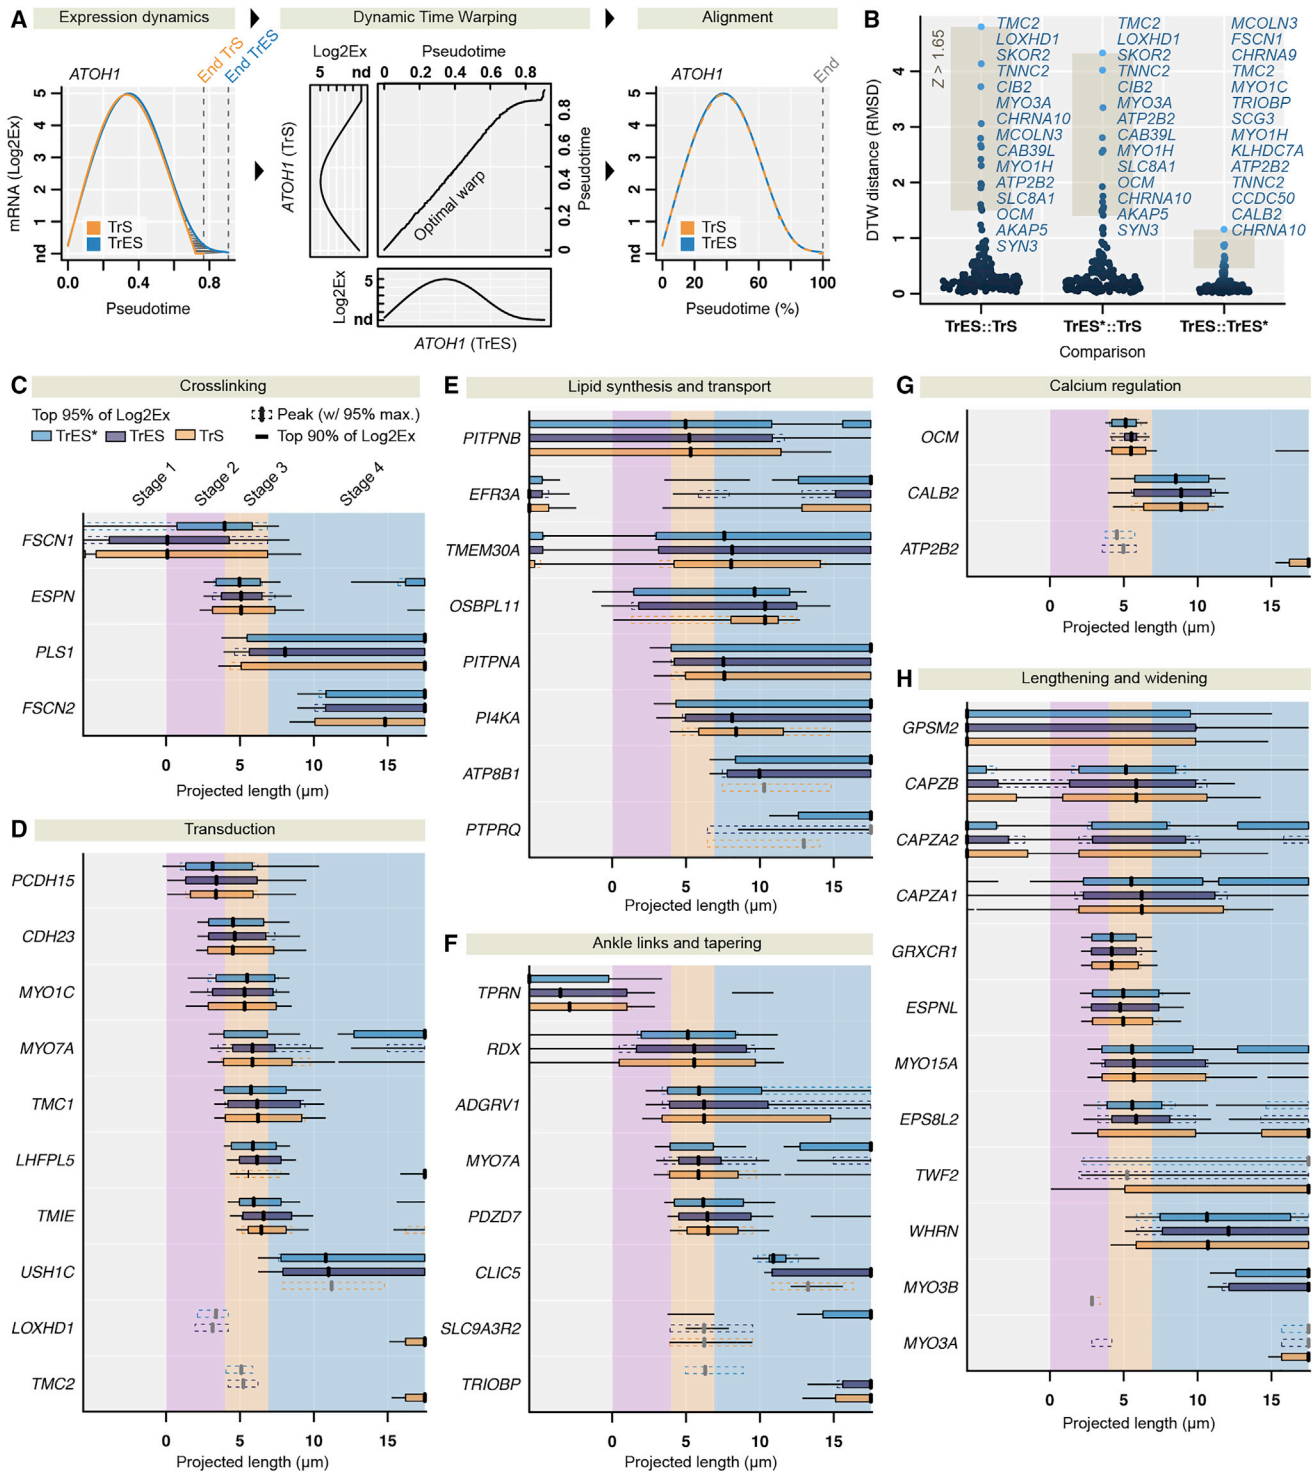

**Figure 5. Comparison of Gene Expression Dynamics during Hair-Bundle Development**

(A) Trail alignment. The trails' pseudotime scale can be distorted as shown for *ATOH1* along TrS and TrES. By using a dynamic programming-based approach, the optimal alignment (time warp) between the trail-specific dynamics is determined.

(B) Expression time series differences. The root-mean-square deviation (RMSD) of each gene between TrES, TrES\*, and TrS was calculated. Highlighted and listed are genes with a Z score >1.65 in the standard log-normal RMSD distribution.

(C–H) Gene expression peaks during bundle development. In the extrastria, pseudotime was translated into bundle length by nonlinear mapping of *CALB2* transcription over pseudotime to *CALB2* protein expression as a function of bundle length (Figure 4F). This mapping enables the interpretation of warped

(legend continued on next page)



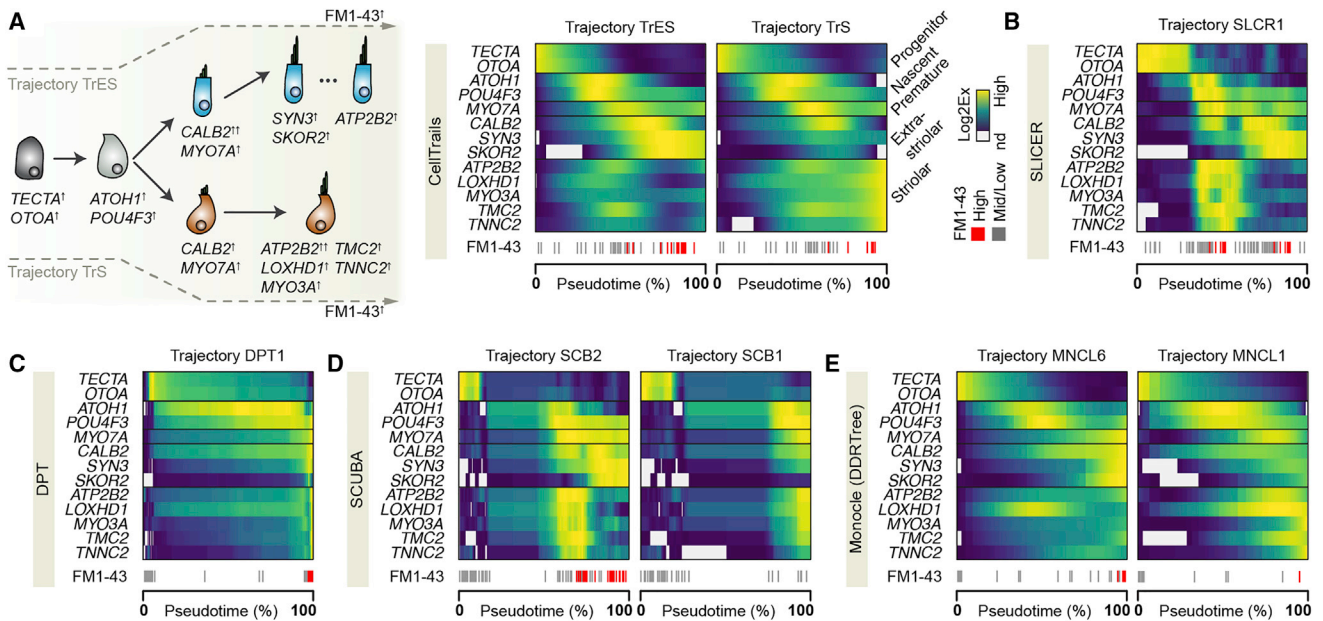

**Figure 6. Expression Dynamic Inference Using State-of-the-Art Algorithms**

(A) Known and validated (here) spatiotemporal gene expression dynamics during bundle development; heatmap illustration of their predicted dynamics by CellTrails, scaled per gene and across trails.

(B–E) Predictions by SLICER (B), DPT (C), SCUBA (D), and Monocle (with DDRTree) (E).

Table S3C). The supporting-cell marker *Tecta* indicated the start of a bifurcating trajectory toward two hair cell types, which were labeled by the late marker *Fscn2*, confirming and substantially extending the original analysis (Burns et al., 2015). The two trails are distinguished by *Ocm* expression; this observation and differential *Sox2* expression suggest that trails Tr2 and Tr1 are respectively associated with development of extrastricular type II hair cells and striolar type I hair cells. For both trails, we observed a transient peak of *Atoh1*.

Differential analysis of Tr1 and Tr2 corroborated reported trail-specific expression dynamics ( $Clu$ ,  $Z = 1.8$ ) and revealed other trail-specific genes (Figures 7H). For example, *Fgf21* ( $Z = 2.0$ ) and *Ai593442* ( $Z = 1.8$ ) were ranked among the most distinguishing genes (Table S3B). *Fgf21* expression increased along Tr2 but was suppressed along Tr1, suggesting that *Fgf21* protein is selectively produced by extrastricular type II hair cells. In contrast, *Ai593442* expression is strong toward the terminus of Tr1 and not in Tr2. Although *Ai593442* is expressed in E14.5 mouse inner ear (Visel et al., 2004), its function is unknown.

## DISCUSSION

Appreciation of hair cell function requires understanding how hair bundles are constructed, which entails cataloging the parts and deciphering the blueprint. While the list of abundant bundle

proteins is well established (Barr-Gillespie, 2015), the multiple and overlapping cellular processes involved in bundle maturation remain to be sorted out. In this study, we provide a resource that combines multiplexed single-cell qRT-PCR with *de novo* computation to document gene-expression dynamics during bundle development.

## CellTrails: A Toolbox for the Reconstruction and Analysis of Branching Trajectories from Single-Cell Data

A single snapshot of an asynchronously developing organ, such as the chicken utricle, constitutes a time series in which individual cells represent distinct time points along a continuum. To derive a coherent picture of a process's dynamical expression landscape, its internal time axis, which determines each cell's position along a trajectory, needs to be computed and visualized.

A key challenge for any such computation is that single-cell data are not only rife with noise, dropouts, and redundancy but are also highly complex due to branching processes. If the intrinsic dimensionality of the data is lower than its extrinsic dimensionality, projection of data points to a low-dimensional manifold reduces noise and emphasizes relevant latent information. We applied nonlinear spectral dimensionality reduction, at the heart of which was the spectral decomposition of a square

expression dynamics in context of bundle length and growth stages. Shown are inter-trail peaks of gene sets denoted by vertical black lines, intervals with >95% and >90% of maximum expression (boxes and horizontal black lines); gray lines and dashed boxes indicate intra-trail peaks. Shown are examples of genes with roles in actin crosslinking (C), mechano-electrical transduction (D), lipid synthesis and transport (E), stereocilia ankle links and tapering (F),  $Ca^{2+}$  regulation (G), and bundle growth (H).

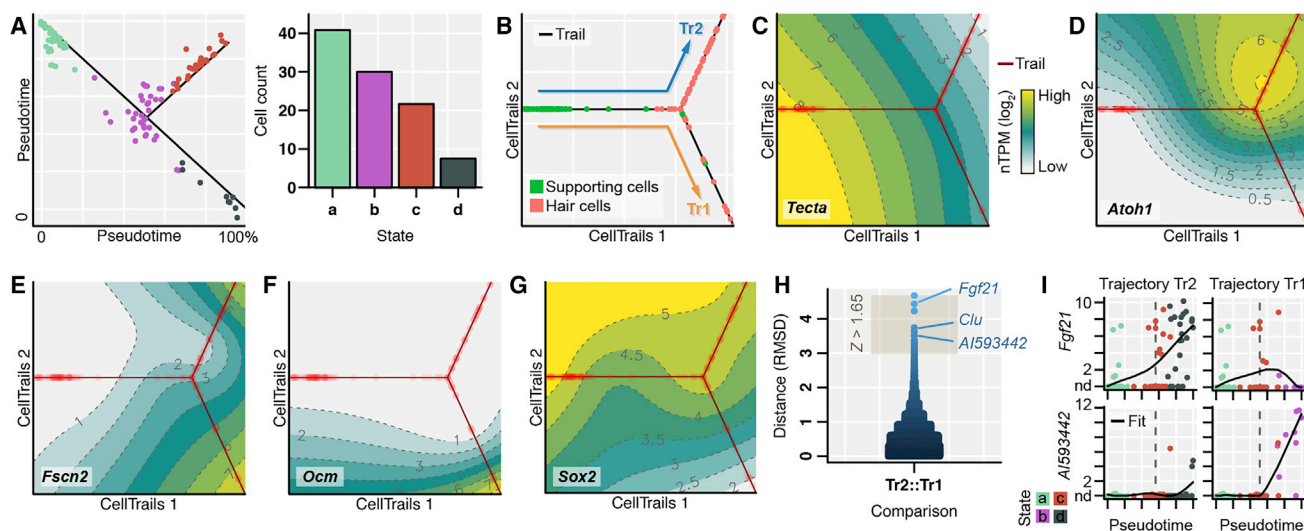

**Figure 7. CellTrails Analysis of Mouse Utricle Single-Cell RNA-Seq Data**

(A) CellTrails determined a branching trajectory with four states (a–c); distance from the trajectory (black line) is proportional to residuals of orthogonal projection. Bar diagram shows size of states.

(B) Trajectory map. Cells are colored by type as defined by genetic labeling (Burns et al., 2015).

(C–G) CellTrails maps exhibit consistent spatiotemporal cell ordering according to expression of supporting cell marker *Tecta* (C), hair cell differentiation marker *Atoh1* (D), late hair cell marker *Fscn2* (E), striolar hair cell marker *Ocm* (F), and *Sox2* (G), a marker of supporting cells and type II hair cells; nTPM = normalized transcripts per million.

(H and I) Differential trail analysis identified 30 highly distinguishing genes. These include the previously validated gene *Clu*, as well as candidates *Fgf21* and *Ai593442*; RMSD, root-mean-square deviation (H). Single-cell expression measurements are plotted as a function of pseudotime for *Fgf21* and *Ai593442*, respectively (I).

symmetric feature matrix. To capture cell-to-cell relationships, this matrix was constructed based on the robust concept of fuzzy conditional entropy; because the optimization function of the embedding is convex, the manifold-learning process is deterministic. When we added increasing fractions of permuted variables or degrees of Gaussian noise to our expression matrix, we found that spectral embedding had significantly greater robustness compared to prevalent spectral methods, such as principal-component analysis (PCA) and diffusion maps (Haghverdi et al., 2015, 2016; Setty et al., 2016) (Figures S7A and S7B). To determine the intrinsic dimensionality of the data, we adapted Scree plots to show eigengaps between ranked components and identified nine relevant dimensions ( $d = 9$ ). Similar results were obtained for PCA ( $d = 8$ ) and diffusion maps ( $d = 11$ ) (Figure S7C). Both nonlinear methods greatly pronounced the bifurcation between striolar and extrastriolar hair cells in the respective low-dimensional manifold, while a refined trajectory structure was less obvious in the principal-component space.

The manifold containing the trajectory structure thus is likely nonlinear, indeed unfolding in a  $\sim 9$ -dimensional latent space. Consequentially, cell ordering with our dataset by SLICER and SCUBA, which initially reduce the original data space to two and three dimensions, may be inaccurate. DPT, which uses the full rank of a latent space derived from diffusion maps, failed to identify the branching point, indicating that the trajectory structure is masked by noise from lower-ranked dimensions. Moreover, the 11-dimensional manifold from diffusion maps did not reveal the mature extrastriolar hair cell population expressing

*ATP2B2*, which we verified experimentally, although those cells were projected in close proximity within the extrastriolar hair cell population by PCA and spectral embedding (Figure S7C). In summary, we suggest that spectral embedding as utilized here is a useful tool for multivariate analysis of single-cell data.

If the lower-dimensional manifold indeed represents a trajectory, then relevant information, such as locally linear pseudotemporal ordering and branching points, can be isolated. For this purpose, we adapted “broken-stick” regression and fitted cells onto straight lines connecting geometric medians of cell populations. Cell groups (states) were determined using a post hoc test on a cluster dendrogram, which retained cluster-to-cluster relations observed in the latent space. The trajectory spanning all relevant states was then computed by an adaption of the minimum spanning-tree algorithm (Kruskal, 1956). While minimizing the overall  $L^2$ -norm between states’ centroids performs well on small expression-vector sets of hyper-spherical shape and non-distorted axes, it failed to capture the accurate trajectory structure of simulated data that violated these assumptions (Figures S7D and S7E). The applied maximum interface tree algorithm overcomes this limitation by assessing the local  $k$ -neighborhood between adjacent states.

We organized the extracted trajectory information in a graph structure that allowed practical applications such as navigation along trails. We introduced an intuitive two-dimensional data representation of expression dynamics along branching trajectories, called CellTrails maps. With increasing sample sizes, data visualization methods face the challenge of displaying expression profiles of many cells and their temporal relations

simultaneously. Although the crowding problem imposed by multiple overlapping cells (e.g., Figures S6A–S6D) can be solved by colorizing areas for a given variable rather than individual data points (Buettner and Theis, 2012), trajectory information remains to be integrated. While a common alternative is to plot expression dynamics of single trails, e.g., by a heatmap, this approach prevents the proper display of multiple branches. CellTrails maps overcome these limitations by delineating developmental-progression pathways through the topological surface of a gene-expression landscape as a function of pseudotime. These maps should allow projection of additional cells sampled from different ages, perturbation analyses, or disease cases, which will facilitate identification of deviations from the reference trajectory that arise due to a specific condition.

We used CellTrails maps to identify developmental paths manually. Although attempts were made to perform this step automatically (e.g., by DPT, SCUBA, and SLICER), we observed that supervised trail selection (e.g., by Monocle) increased accuracy (Figure 6). In addition to partially overlapping trails, we observed that progression endpoints become latent if a terminal state of one cell type is similar to an intermediate state of another cell type (TrES\*, TrES). We found that the structure of the lower-dimensional manifold can be used to distinguish such sub-trails.

Finally, differential trail analysis was performed by pairwise warping gene-expression time series. As single-cell measurements amass, the need to pinpoint differences and similarities in timing and extent of gene regulation, which govern canonical and disease processes as they unfold over time, will become increasingly important (Alpert et al., 2018).

To demonstrate that our framework is suitable for a wide range of problems, we performed independent analyses on single-cell measurements from hematopoiesis (Moignard et al., 2013) and from early development of the mouse embryo (Guo et al., 2010). CellTrails correctly identified the branching trajectories expected from known lineage hierarchies (Figures S7F–S7K). Moreover, as shown in Figure 7, CellTrails is suitable for use with RNA-seq data.

CellTrails is freely available as an extension for R (<http://hellerlab.stanford.edu/celltrails/>).

### Biological Implications for Utricle Hair-Bundle Development

The CellTrails analysis accurately predicts the known dynamic behavior of actin crosslinking molecules in hair cells. Consistent with previous results (Avenarius et al., 2014; Krey et al., 2016), CellTrails showed that *FSCN1* transcripts decrease in expression during hair cell development, *ESPN* peaks early during hair-bundle assembly, and *PLS1* and *FSCN2* appear late (Figure 5C).

Our results highlight a developmental split in chicken utricle hair cells, where trails TrS and TrES/TrES\* lead respectively to striolar hair cells and extrastriolar hair cells with discrete differences in hair-bundle shape. Moreover, we found evidence for distinct extrastriolar type II hair cell subclasses. The transcriptional regulator *SKOR2*, which promotes early differentiation of cerebellar Purkinje cells (Nakatani et al., 2014), could bias cells to TrES/TrES\* over TrS; *SKOR2* is expressed at substantially higher levels along TrES/TrES\* compared to TrS, and its concen-

tration rises at the trail bifurcation (Figure 3D; Table S2A). Expression of genes required for hair-bundle development unfolds distinctly in the two main trajectories and likely underlies the morphological differences seen in stereocilia structure and organization in striolar and extrastriolar hair cells (Figure 4C). Most proteins known to be important for stereocilia lengthening or widening have similar expression levels and timing between the TrS and TrES/TrES\* cells (Figure 5H), however, suggesting that the control of stereocilia dimensions may rely on relatively subtle differences in expression between the two cell types. Of the proteins most strongly differentially regulated between the two main cell trajectories (Figure 5B), only two are cytoskeletal proteins expressed in bundles (*MYO1H* and *MYO3A*); several proteins are involved in mechanotransduction (*TMC2* and *CIB2*), while others play regulatory roles (*AKAP5*, *CAB39L*). *TNNC2*, a  $\text{Ca}^{2+}$ -binding subunit of troponin that controls its binding to actin filaments, is markedly elevated in TrS cells but has not been identified in bundles (Krey et al., 2015; Shin et al., 2013), which suggests that it affects the TrS versus TrES/TrES\* distinction through its activity in the cell body. Remarkably, all of these proteins bind  $\text{Ca}^{2+}$ , are regulated by  $\text{Ca}^{2+}$ -binding proteins, or control  $\text{Ca}^{2+}$  entry into hair cells, which suggests that control of  $\text{Ca}^{2+}$  plays a role in distinguishing striolar and extrastriolar bundle structure.

Indeed, one of our most interesting observations was the timed expression of the  $\text{Ca}^{2+}$  pump *ATP2B2* and mobile  $\text{Ca}^{2+}$  buffer *CALB2*. While localized control of  $[\text{Ca}^{2+}]_i$  is important for physiology of mature hair cells, our findings suggest that differentially controlling local  $[\text{Ca}^{2+}]_i$  with buffers and pumps may also be important during hair-bundle maturation. Recent data support Tilney's proposal that  $\text{Ca}^{2+}$  entry at stereocilia tips increases actin filament elongation (Tilney et al., 1988; Vélez-Ortega et al., 2017), but  $[\text{Ca}^{2+}]_i$  could also regulate stereocilia widening. *ATP2B2*, which sets resting  $[\text{Ca}^{2+}]_i$  in stereocilia (Lumpkin and Hudspeth, 1998), is upregulated at stage 3, when elongation of stereocilia stops and they instead widen. During stage 3, high levels of *ATP2B2* should maintain very low  $[\text{Ca}^{2+}]_i$  throughout the stereocilium, which could be a precondition for addition of new filaments to the actin core. *ATP2B2* remains high during late bundle development in TrS cells, perhaps facilitating further stereocilia widening in striolar hair cells. By contrast, *CALB2* mRNA is only elevated early during stage 4, when bundles resume elongation. The high levels of *CALB2* during stage 4 should still allow elevated  $\text{Ca}^{2+}$  near stereocilia tips, but the relatively low affinity of *CALB2* for  $\text{Ca}^{2+}$  (Schwaller, 2010) means that  $[\text{Ca}^{2+}]_i$  along stereocilia shafts should be at moderate levels, perhaps preventing addition of new filaments. Differential control of  $\text{Ca}^{2+}$  in striolar and extrastriolar stereocilia again emphasizes the role in distinguishing the two bundle types.

Our results reveal the sequence of expression of key genes during hair-bundle assembly in the chick utricle. We envision that additional data will reveal further regional diversity of cells, such as differences along the medial-to-lateral axis between MES and lateral extrastriolar (LES) cells, or along the anterior-to-posterior axis. To fully understand bundle assembly, however, additional information is also required at the protein level—including biochemical activity, regulation, intracellular transport, and protein interaction partners. Expression dynamics



reported here will nonetheless greatly assist in developing predictive models for the process of bundle assembly during development.

## STAR★METHODS

Detailed methods are provided in the online version of this paper and include the following:

- **KEY RESOURCES TABLE**
- **CONTACT FOR REAGENT AND RESOURCE SHARING**
- **EXPERIMENTAL MODEL AND SUBJECT DETAILS**
- **METHOD DETAILS**
  - Single-cell qRT-PCR Data from Chicken Utricles
  - The CellTrails Framework
  - Robustness Analysis
  - Processing and Analysis of Other Datasets
  - Application of Alternative Algorithms
  - Edu Injections
  - *In situ* Hybridization
  - Immunocytochemistry
  - Microscopy and Image Analysis
  - Scanning Electron Microscopy (SEM)
  - Analysis of Bundle Length Measurements
- **QUANTIFICATION AND STATISTICAL ANALYSIS**
- **DATA AND SOFTWARE AVAILABILITY**
  - Data
  - Software

## SUPPLEMENTAL INFORMATION

Supplemental Information includes seven figures and three tables and can be found with this article online at <https://doi.org/10.1016/j.celrep.2018.05.002>.

## ACKNOWLEDGMENTS

We thank the Heller laboratory members for inspiring discussions and comments on the manuscript, as well as Dr. D. Maoiléidigh for expert evaluation of mathematical methods, and Drs. Robert Durruthy-Durruthy and Matthew R. Avenarius for their initial help with cell sorting and immunohistochemistry, respectively. P.G.B.-G. is supported by R01DC11034. S.H. is supported by R01DC15201, by the Hearing Health Foundation's Hearing Restoration Project, and through the Stanford Initiative to Cure Hearing Loss by generous gifts from the Evslin family and the Bill and Susan Oberndorf foundations. D.C.E. was supported in part by a Stanford Dean's fellowship. We acknowledge the Stanford Shared FACS facility and the SEM facility at the Center for Electron Microscopy and Nanofabrication, Portland State University. Electron microscopy was also performed at the Multiscale Microscopy Core (MMC) with technical support from the Oregon Health & Science University (OHSU)-FEI Living Lab and the OHSU Center for Spatial Systems Biomedicine.

## AUTHOR CONTRIBUTIONS

D.C.E., M.S., P.G.B.-G., and S.H. conceived the study, interpreted the results, and wrote the manuscript. D.C.E. designed and performed the data analysis and developed and implemented the CellTrails algorithm. M.S. collected the single-cell data, conducted immunohistochemistry and imaging, and performed quantitative measurements. S.H. did *in situ* hybridization experiments. R.A.D. conducted scanning electron microscopy. S.H., M.S., and P.G.B.-G. designed the assay.

## DECLARATION OF INTERESTS

The authors declare no competing interests.

Received: October 19, 2017

Revised: March 19, 2018

Accepted: May 1, 2018

Published: June 5, 2018

## REFERENCES

- Aach, J., and Church, G.M. (2001). Aligning gene expression time series with time warping algorithms. *Bioinformatics* *17*, 495–508.
- Alpert, A., Moore, L.S., Dubovik, T., and Shen-Orr, S.S. (2018). Alignment of single-cell trajectories to compare cellular expression dynamics. *Nat. Methods* *15*, 267–270.
- Avenarius, M.R., Saylor, K.W., Lundeberg, M.R., Wilmarth, P.A., Shin, J.B., Spinelli, K.J., Pagana, J.M., Andrade, L., Kachar, B., Choi, D., et al. (2014). Correlation of actin crosslinker and capper expression levels with stereocilia growth phases. *Mol. Cell. Proteomics* *13*, 606–620.
- Barr-Gillespie, P.G. (2015). Assembly of hair bundles, an amazing problem for cell biology. *Mol. Biol. Cell* *26*, 2727–2732.
- Bedall, F.K., and Zimmermann, H. (1979). Algorithm AS143. The median-centre. *Appl. Stat.* *28*, 325–328.
- Belkin, M., and Niyogi, P. (2003). Laplacian eigenmaps for dimensionality reduction and data representation. *Neural Comput.* *15*, 1373–1396.
- Birmingham, N.A., Hassan, B.A., Price, S.D., Vollrath, M.A., Ben-Arie, N., Eatock, R.A., Bellen, H.J., Lysakowski, A., and Zoghbi, H.Y. (1999). *Math1*: An essential gene for the generation of inner ear hair cells. *Science* *284*, 1837–1841.
- Buettner, F., and Theis, F.J. (2012). A novel approach for resolving differences in single-cell gene expression patterns from zygote to blastocyst. *Bioinformatics* *28*, i626–i632.
- Burns, J.C., Kelly, M.C., Hoa, M., Morell, R.J., and Kelley, M.W. (2015). Single-cell RNA-seq resolves cellular complexity in sensory organs from the neonatal inner ear. *Nat. Commun.* *6*, 8557.
- Daub, C.O., Steuer, R., Selbig, J., and Kloska, S. (2004). Estimating mutual information using B-spline functions—an improved similarity measure for analyzing gene expression data. *BMC Bioinformatics* *5*, 118.
- Drummond, M.C., Belyantseva, I.A., Friderici, K.H., and Friedman, T.B. (2012). Actin in hair cells and hearing loss. *Hear. Res.* *288*, 89–99.
- Dumont, R.A., Lins, U., Filoteo, A.G., Penniston, J.T., Kachar, B., and Gillespie, P.G. (2001). Plasma membrane Ca<sup>2+</sup>-ATPase isoform 2a is the PMCA of hair bundles. *J. Neurosci.* *21*, 5066–5078.
- Durruthy-Durruthy, R., Gottlieb, A., Hartman, B.H., Waldhaus, J., Laske, R.D., Altman, R., and Heller, S. (2014). Reconstruction of the mouse otocyst and early neuroblast lineage at single-cell resolution. *Cell* *157*, 964–978.
- Fettiplace, R., and Kim, K.X. (2014). The physiology of mechano-electrical transduction channels in hearing. *Physiol. Rev.* *94*, 951–986.
- Gale, J.E., Marcotti, W., Kennedy, H.J., Kros, C.J., and Richardson, G.P. (2001). FM1-43 dye behaves as a permeant blocker of the hair-cell mechano-transducer channel. *J. Neurosci.* *21*, 7013–7025.
- Gillespie, P.G., and Müller, U. (2009). Mechanotransduction by hair cells: Models, molecules, and mechanisms. *Cell* *139*, 33–44.
- Goodyear, R.J., Gates, R., Lukashkin, A.N., and Richardson, G.P. (1999). Hair-cell numbers continue to increase in the utricular macula of the early posthatch chick. *J. Neurocytol.* *28*, 851–861.
- Guo, G., Huss, M., Tong, G.Q., Wang, C., Li Sun, L., Clarke, N.D., and Robson, P. (2010). Resolution of cell fate decisions revealed by single-cell gene expression analysis from zygote to blastocyst. *Dev. Cell* *18*, 675–685.
- Haghverdi, L., Buettner, F., and Theis, F.J. (2015). Diffusion maps for high-dimensional single-cell analysis of differentiation data. *Bioinformatics* *31*, 2989–2998.

- Haghverdi, L., Büttner, M., Wolf, F.A., Buettner, F., and Theis, F.J. (2016). Diffusion pseudotime robustly reconstructs lineage branching. *Nat. Methods* **13**, 845–848.
- Hunter-Duvar, I.M. (1978). A technique for preparation of cochlear specimens for assessment with the scanning electron microscope. *Acta Otolaryngol. Suppl.* **351**, 3–23.
- Jorgensen, J.M. (1989). Number and distribution of hair cells in the utricular macula of some avian species. *J. Morphol.* **201**, 187–204.
- Killick, R., Legan, P.K., Malenczak, C., and Richardson, G.P. (1995). Molecular cloning of chick beta-tectorin, an extracellular matrix molecule of the inner ear. *J. Cell Biol.* **129**, 535–547.
- Krey, J.F., Sherman, N.E., Jeffery, E.D., Choi, D., and Barr-Gillespie, P.G. (2015). The proteome of mouse vestibular hair bundles over development. *Sci. Data* **2**, 150047.
- Krey, J.F., Krystofiak, E.S., Dumont, R.A., Vijayakumar, S., Choi, D., Rivero, F., Kachar, B., Jones, S.M., and Barr-Gillespie, P.G. (2016). Plastin 1 widens stereocilia by transforming actin filament packing from hexagonal to liquid. *J. Cell Biol.* **215**, 467–482.
- Kruskal, J.B. (1956). On the shortest spanning subtree of a graph and the traveling salesman problem. *Proc. Am. Math. Soc.* **7**, 48–50.
- Ku, Y.C., Renaud, N.A., Veile, R.A., Helms, C., Voelker, C.C., Warchol, M.E., and Lovett, M. (2014). The transcriptome of utricle hair cell regeneration in the avian inner ear. *J. Neurosci.* **34**, 3523–3535.
- Lumpkin, E.A., and Hudspeth, A.J. (1998). Regulation of free Ca<sup>2+</sup> concentration in hair-cell stereocilia. *J. Neurosci.* **18**, 6300–6318.
- Macosko, E.Z., Basu, A., Satija, R., Nemes, J., Shekhar, K., Goldman, M., Tirosh, I., Bialas, A.R., Kamitaki, N., Martersteck, E.M., et al. (2015). Highly parallel genome-wide expression profiling of individual cells using nanoliter droplets. *Cell* **161**, 1202–1214.
- Marco, E., Karp, R.L., Guo, G., Robson, P., Hart, A.H., Trippa, L., and Yuan, G.C. (2014). Bifurcation analysis of single-cell gene expression data reveals epigenetic landscape. *Proc. Natl. Acad. Sci. USA* **111**, E5643–E5650.
- Moignard, V., Macaulay, I.C., Swiers, G., Buettner, F., Schütte, J., Calero-Nieto, F.J., Kinston, S., Joshi, A., Hannah, R., Theis, F.J., et al. (2013). Characterization of transcriptional networks in blood stem and progenitor cells using high-throughput single-cell gene expression analysis. *Nat. Cell Biol.* **15**, 363–372.
- Nakatani, T., Minaki, Y., Kumai, M., Nitta, C., and Ono, Y. (2014). The c-Ski family member and transcriptional regulator Corl2/Skor2 promotes early differentiation of cerebellar Purkinje cells. *Dev. Biol.* **388**, 68–80.
- Pollard, T.D. (2014). The value of mechanistic biophysical information for systems-level understanding of complex biological processes such as cytokinesis. *Biophys. J.* **107**, 2499–2507.
- Sakoe, H., and Chiba, S. (1978). Dynamic programming algorithm optimization for spoken word recognition. *IEEE Trans. Acoust. Speech Signal Process.* **26**, 43–49.
- Schwaller, B. (2010). Cytosolic Ca<sup>2+</sup> buffers. *Cold Spring Harb. Perspect. Biol.* **2**, a004051.
- Setty, M., Tadmor, M.D., Reich-Zeliger, S., Angel, O., Salame, T.M., Kathail, P., Choi, K., Bendall, S., Friedman, N., and Pe'er, D. (2016). Wishbone identifies bifurcating developmental trajectories from single-cell data. *Nat. Biotechnol.* **34**, 637–645.
- Shannon, C.E. (1948). A mathematical theory of communication. *The Bell System Technical Journal* **27**, 379–423.
- Shin, J.B., Krey, J.F., Hassan, A., Metlagel, Z., Tauscher, A.N., Pagana, J.M., Sherman, N.E., Jeffery, E.D., Spinelli, K.J., Zhao, H., et al. (2013). Molecular architecture of the chick vestibular hair bundle. *Nat. Neurosci.* **16**, 365–374.
- Sussman, D.L., Tang, M., Fishkind, D.E., and Priebe, C.E. (2012). A Consistent Adjacency Spectral Embedding for Stochastic Blockmodel Graphs. *J. Am. Stat. Assoc.* **107**, 1119–1128.
- Tilney, L.G., Tilney, M.S., and Cotanche, D.A. (1988). Actin filaments, stereocilia, and hair cells of the bird cochlea. V. How the staircase pattern of stereociliary lengths is generated. *J. Cell Biol.* **106**, 355–365.
- Tilney, L.G., Cotanche, D.A., and Tilney, M.S. (1992a). Actin filaments, stereocilia and hair cells of the bird cochlea. VI. How the number and arrangement of stereocilia are determined. *Development* **116**, 213–226.
- Tilney, L.G., Tilney, M.S., and DeRosier, D.J. (1992b). Actin filaments, stereocilia, and hair cells: How cells count and measure. *Annu. Rev. Cell Biol.* **8**, 257–274.
- Trapnell, C., Cacchiarelli, D., Grimsby, J., Pokharel, P., Li, S., Morse, M., Lennon, N.J., Livak, K.J., Mikkelsen, T.S., and Rinn, J.L. (2014). The dynamics and regulators of cell fate decisions are revealed by pseudotemporal ordering of single cells. *Nat. Biotechnol.* **32**, 381–386.
- Van Camp, G., and Smith, R.J.H. (2017). Hereditary hearing loss homepage. <http://hereditaryhearingloss.org>.
- Vélez-Ortega, A.C., Freeman, M.J., Indzhukulian, A.A., Grossheim, J.M., and Frolenkov, G.I. (2017). Mechanotransduction current is essential for stability of the transducing stereocilia in mammalian auditory hair cells. *eLife*, Published online March 28, 2017. <https://doi.org/10.7554/eLife.24661>.
- Visel, A., Thaller, C., and Eichele, G. (2004). GenePaint.org: An atlas of gene expression patterns in the mouse embryo. *Nucleic Acids Res.* **32**, D552–D556.
- Ward, J.H. (1963). Hierarchical grouping to optimize an objective function. *J. Am. Stat. Assoc.* **58**, 236.
- Welch, J.D., Hartemink, A.J., and Prins, J.F. (2016). SLICER: Inferring branched, nonlinear cellular trajectories from single cell RNA-seq data. *Genome Biol.* **17**, 106.
- Wilmarth, P.A., Krey, J.F., Shin, J.B., Choi, D., David, L.L., and Barr-Gillespie, P.G. (2015). Hair-bundle proteomes of avian and mammalian inner-ear utricles. *Sci. Data* **2**, 150074.
- Wood, S.N. (2006). *Generalized Additive Models: An Introduction with R* (Chapman & Hall/CRC).

## STAR★METHODS

### KEY RESOURCES TABLE

| REAGENT or RESOURCE                                           | SOURCE                                  | IDENTIFIER  |
|---------------------------------------------------------------|-----------------------------------------|-------------|
| <b>Antibodies</b>                                             |                                         |             |
| Goat anti-SOX2 (1:100)                                        | Santa Cruz Biotechnology                | AB_2286684  |
| Rabbit anti-MYO7A (1:1000)                                    | Proteus Biosciences                     | AB_10015251 |
| Rabbit anti-MYO3A (1:250)                                     | Dose et al., 2003 (B. Burnside)         | N/A         |
| Rabbit anti-ATP2B2 (1:250)                                    | Dumont et al., 2001 (P. Barr-Gillespie) | N/A         |
| Rabbit anti-TNNC2 (1:100)                                     | Proteintech                             | 15875-1-ap  |
| Rabbit anti-TECTB (1:2500)                                    | Killick et al., 1995                    | N/A         |
| Rabbit anti-FSCN2 (1:250)                                     | Genemed Synthesis                       | N/A         |
| Rabbit anti-CALB2 (1:250)                                     | Swant                                   | AB_2619710  |
| Mouse anti-ACETYL $\alpha$ -TUBULIN (1:1000)                  | Sigma-Aldrich                           | AB_477585   |
| Rabbit anti-NF 200KD (1:500)                                  | Sigma-Aldrich                           | AB_477272   |
| Alexa Fluor 546 donkey anti-rabbit (1:250)                    | Thermo Fisher Scientific                | AB_2534016  |
| Alexa Fluor 647 donkey anti-rabbit (1:100)                    | Thermo Fisher Scientific                | AB_2536183  |
| Alexa Fluor 488 donkey anti-goat (1:250)                      | Thermo Fisher Scientific                | AB_2534102  |
| Alexa Fluor 546 donkey anti-goat (1:250)                      | Thermo Fisher Scientific                | AB_2534103  |
| Alexa Fluor 546 donkey anti-mouse (1:250)                     | Thermo Fisher Scientific                | AB_2534012  |
| Alexa Fluor 647 donkey anti-mouse (1:100)                     | Thermo Fisher Scientific                | AB_162542   |
| Anti-digoxigenin-AP Fab fragments                             | Sigma-Aldrich                           | AB_514497   |
| <b>Chemicals</b>                                              |                                         |             |
| DAPI (4',6-Diamidino-2-Phenylindole, Dihydrochloride, 1:1000) | Thermo Fisher Scientific                | AB_2629482  |
| Alexa Fluor 488 Phalloidin (1:1000)                           | Invitrogen                              | AB_2315147  |
| <b>Critical Commercial Assays</b>                             |                                         |             |
| Click-iT EdU Alexa Fluor 647 Imaging Kit                      | Thermo Fisher Scientific                | C10340      |
| CellsDirect                                                   | Thermo Fisher Scientific                | 11753500    |
| High Capacity cDNA Reverse Transcription Kit                  | Thermo Fisher Scientific                | 4368814     |
| SsoFast EvaGreen SuperMix with Low Rox                        | Bio-Rad Laboratories                    | PN172-5211  |
| SUPERase-In RNase Inhibitor                                   | Thermo Fisher Scientific                | AM2696      |
| 2X Assay Loading Reagent                                      | Fluidigm                                | 100-7611    |
| TE Buffer                                                     | TEKnova                                 | PN T0224    |
| DNA Suspension Buffer                                         | TEKnova                                 | PN T0221    |
| 20X DNA Binding Dye                                           | Fluidigm                                | 100-7609    |
| Exonuclease I                                                 | New England BioLabs                     | M0293L      |
| Control Line Fluid Kit                                        | Fluidigm                                | 89000021    |
| 96.96 Dynamic Array IFC for Gene Expression                   | Fluidigm                                | BMK-M 96.96 |
| TempPlate non-skirted 96-well PCR plate                       | USA Scientific                          | 1402-9596   |
| TempPlate pierceable sealing foil                             | USA Scientific                          | 2923-0110   |
| SP6/T7 Transcription Kit                                      | Sigma-Aldrich                           | 10999644001 |
| Blocking Reagent, Roche                                       | Sigma-Aldrich                           | 11096176001 |
| TaqMan PreAmp Master Mix Kit                                  | Thermo Fisher Scientific                | 4384267     |
| SYTOX Red Dead Cell Stain                                     | Thermo Fisher Scientific                | S34859      |
| Accutase                                                      | Innovative Cell Technologies            | AT104       |
| Thermolysin from Geobacillus stearothermophilus               | Sigma-Aldrich                           | P1512       |
| FM1-43FX                                                      | Thermo Fisher Scientific                | F35355      |

(Continued on next page)



**Continued**

| REAGENT or RESOURCE                                            | SOURCE                                                                                                                                          | IDENTIFIER     |
|----------------------------------------------------------------|-------------------------------------------------------------------------------------------------------------------------------------------------|----------------|
| Medium 199, Hank's Balanced Salts                              | Thermo Fisher Scientific                                                                                                                        | 12350039       |
| Secure-Seal Spacer                                             | Thermo Fisher Scientific                                                                                                                        | S24735         |
| Deposited Data                                                 |                                                                                                                                                 |                |
| Experimental Models: Organisms/Strains                         |                                                                                                                                                 |                |
| Gallus gallus (Rhode Island Red), fertilized eggs              | AA Lab Eggs, Westminster, CA                                                                                                                    | N/A            |
| Oligonucleotides                                               |                                                                                                                                                 |                |
| <i>In situ</i> hybridization primers, see Table S1D            | This paper                                                                                                                                      | N/A            |
| Software and Algorithms                                        |                                                                                                                                                 |                |
| Biomark Data Collection Software                               | Fluidigm                                                                                                                                        | Version 3.1.2  |
| qRT-PCR Analysis Software                                      | Fluidigm                                                                                                                                        | Version 4.1.3  |
| R Statistical Software                                         | <a href="https://www.r-project.org">https://www.r-project.org</a>                                                                               | Version 3.4.3  |
| MATLAB                                                         | MathWorks                                                                                                                                       | Version R2015b |
| <i>destiny</i> – R package                                     | <a href="https://bioconductor.org/packages/release/bioc/html/destiny.html">https://bioconductor.org/packages/release/bioc/html/destiny.html</a> | Version 2.6.1  |
| <i>EnvStats</i> – R package                                    | <a href="https://cran.r-project.org/web/packages/EnvStats/index.html">https://cran.r-project.org/web/packages/EnvStats/index.html</a>           | Version 2.3.0  |
| <i>dbscan</i> – R package                                      | <a href="https://cran.r-project.org/web/packages/dbscan/index.html">https://cran.r-project.org/web/packages/dbscan/index.html</a>               | Version 1.1-1  |
| <i>dpt</i> – R package                                         | Haghverdi et al., 2016                                                                                                                          | Version 0.6.0  |
| <i>dtw</i> – R package                                         | <a href="https://cran.r-project.org/web/packages/dtw/index.html">https://cran.r-project.org/web/packages/dtw/index.html</a>                     | Version 1.18-1 |
| <i>mgcv</i> – R package                                        | <a href="https://cran.r-project.org/web/packages/mgcv/index.html">https://cran.r-project.org/web/packages/mgcv/index.html</a>                   | Version 1.8-22 |
| <i>mixtools</i> – R package                                    | <a href="https://cran.r-project.org/web/packages/mixtools/index.html">https://cran.r-project.org/web/packages/mixtools/index.html</a>           | Version 1.1.0  |
| <i>monocle</i> – R package                                     | <a href="http://bioconductor.org/packages/release/bioc/html/monocle.html">http://bioconductor.org/packages/release/bioc/html/monocle.html</a>   | Version 2.2.0  |
| <i>Rtsne</i> – R package                                       | <a href="https://cran.r-project.org/web/packages/Rtsne/index.html">https://cran.r-project.org/web/packages/Rtsne/index.html</a>                 | Version 0.13   |
| SCUBA – MATLAB package                                         | <a href="https://github.com/gcyuan/SCUBA">https://github.com/gcyuan/SCUBA</a>                                                                   | Version 1.0    |
| SLICER – R package                                             | <a href="https://github.com/jw156605/SLICER">https://github.com/jw156605/SLICER</a>                                                             | Version 0.2.0  |
| <i>scater</i> – R package                                      | <a href="https://bioconductor.org/packages/release/bioc/html/scater.html">https://bioconductor.org/packages/release/bioc/html/scater.html</a>   | Version 1.6.1  |
| <i>scrn</i> – R package                                        | <a href="https://bioconductor.org/packages/release/bioc/html/scrn.html">https://bioconductor.org/packages/release/bioc/html/scrn.html</a>       | Version 1.6.6  |
| <i>zoo</i> – R package                                         | <a href="https://cran.r-project.org/web/packages/zoo/index.html">https://cran.r-project.org/web/packages/zoo/index.html</a>                     | Version 1.7-14 |
| yEd Graph Editor Software                                      | <a href="https://www.yworks.com">https://www.yworks.com</a>                                                                                     | Version 3.14.4 |
| Other                                                          |                                                                                                                                                 |                |
| Biomark HD System                                              | Fluidigm                                                                                                                                        | N/A            |
| IFC Controller HX                                              | Fluidigm                                                                                                                                        | N/A            |
| LSM 700 confocal microscope/ A Plan-Apochromat 40x/1.3 NA      | Zeiss                                                                                                                                           | N/A            |
| LSM 880 with Airyscan microscope/ A Plan-Apochromat 40x/1.3 NA | Zeiss                                                                                                                                           | N/A            |
| Axiomager M1/ EC PLAN-Neofluar 10x/0,30 M27                    | Zeiss                                                                                                                                           | N/A            |
| Helios Nanolab 660 DualBeam scanning electron microscope       | FEI                                                                                                                                             | N/A            |
| Sirion XL30 FEG field-emission scanning electron microscope    | FEI                                                                                                                                             | N/A            |

**CONTACT FOR REAGENT AND RESOURCE SHARING**

Further information and requests for resources and reagents should be directed to and will be fulfilled by the Lead Contact, Stefan Heller ([hellers@stanford.edu](mailto:hellers@stanford.edu)).

## EXPERIMENTAL MODEL AND SUBJECT DETAILS

Fertilized chicken eggs were incubated at 38°C in a humidified incubator with automatically rocking racks. At the 18<sup>th</sup> day of embryonic development, the eggs were moved to a dedicated hatching incubator where they remained until the animals hatched. Successfully hatched chickens were moved into a brooder box with a heat lamp, food, and water, then were housed for additional 7 days (P7). Posthatch chickens were euthanized by CO<sub>2</sub> inhalation, while embryonic chickens were decapitated. Animal procedures were approved by the Stanford University's Institutional Animal Care and Use Committee.

## METHOD DETAILS

### Single-cell qRT-PCR Data from Chicken Utricles

#### Single Cell Isolation and Flow Cytometry

Single cells were collected from utricle sensory epithelia at embryonic day 15, within 12 hr after hatching (P0), and 7 days posthatch (P7). Utricles were dissected in ice-cold Medium 199 containing Hanks' salts (M199; GIBCO – Thermo Fisher Scientific) and otolithic membranes were removed without enzymatic treatment. Next, utricles were transferred with a micro-spoon for 15 s into 10 μM FM1-43 (FM1-43FX, Biotium) in M199 at room temperature. Utricles were then transferred into M199 to wash off residual FM1-43 dye. Stained tissues were incubated in thermolysin (0.5 mg/mL; Sigma) in M199 for 20 min at 37°C followed by inactivation using 10% FBS in M199. The tissue's circumferential non-sensory edges were trimmed away using a sapphire knife. Sensory epithelia were carefully peeled off from the underlying stromal cells using a 30-gauge ½-inch hypodermic needle attached to 1 mL syringe. Cells from either the lateral or the medial side were sampled by cutting along the anterior-posterior axis using a sapphire knife. For each experiment, we pooled 6 utricles. Finally, the sensory epithelia were dissociated using Accutase (Innovative Cell Technology) for 20 min at 37°C, followed by mild mechanical trituration, and washed twice with PBS using centrifugation for replacement of buffer (300 g, 5 min).

Cells were sorted with a FACSAria II instrument (BD Biosciences) set to “single cell” mode and equipped with a 100 μm nozzle. Debris was removed based on side-scatter area (SSC-A) and forward-scatter area (FSC-A) (Figure S1Di). Doublets were discarded using two subsequent gating steps: forward-scatter height (FSC-H) versus forward-scatter area (FSC-A), and side-scatter width (SSC-W) versus side-scatter area (SSC-A) (Figure S1Dii–iii). SYTOX<sup>®</sup> Red Dead Cell Stain (Molecular Probes) was used to identify live and dead cells (SSC-A versus SYTOX Red) (Figure S1Div). Based on our final gating approach (SSC-A versus FITC-A (FM1-43)), either single cells (Figure S1Dv) or single FM1-43High-, FM1-43Middle-, and FM1-43Low-cells (Figure 1C) were deposited into individual wells of 96-well PCR plates (USA Scientific). Wells were prepared beforehand with 5 μL of CellsDirect Reaction mix (Invitrogen) and 0.05 U of SUPERase-In RNase Inhibitor (Invitrogen). Cells were sorted with a flow rate of 300 cells/sec. Filled 96-well plates were immediately sealed and transferred to dry ice, and stored at –80°C.

#### Primer Validation

We chose 190 genes for generation of qRT-PCR experiments that included those encoding proteins that were highly expressed or highly enriched in purified chick hair bundles (Shin et al., 2013; Wilmarth et al., 2015), those with transcripts enriched in chick utricle hair cells (Ku et al., 2014), and those encoding deafness genes that were known to be expressed in stereocilia (Van Camp and Smith, 2017). Primer pairs (DELTAgene assays, Fluidigm) were assessed for efficiency, sensitivity, and specificity by performing a dilution series analysis on bulk RNA isolated from E15 utricles that included the stromal cell layer and nerve fibers. Total RNA (1 μg) was reverse-transcribed using recombinant Moloney murine leukemia virus reverse transcriptase (High Capacity cDNA Reverse Transcription Kit). 100 ng of resulting cDNA was pre-amplified (19 cycles) using 500 nM of pooled DELTAgene Assay mix and TaqMan PreAmp Mix (Applied Biosystems). Exonuclease I was used to remove single stranded primer oligonucleotides. A 2-fold dilution series of 15 concentrations ranging from 100 ng to 6 pg was prepared with TE buffer (Ambion). Six technical replicates were used to determine the threshold for each primer pair at which technical noise of the instrument becomes too large. Specificity of amplification for a single product was verified by examining the melting curves for each primer pair. 185 effective primer pairs were filtered by analyzing the relationship between the average C<sub>T</sub> value ( $y$ ) per dilution and the input template concentration ( $x$ ) using a linear semi-log regression model:  $y \sim c - s \log_2(x)$ . We retained primers with an excellent performance indicated by an R squared ( $R^2$ )  $\geq 0.9$  and an amplification efficiency  $(-1 + \frac{1}{2^{-s}}) \geq 0.9$ . The limit of detection (LOD) was determined for each primer pair by determining the highest dilution for which a C<sub>T</sub> value was recorded for all 6 replicates; the mean C<sub>T</sub> value defined the primer specific detection limit. The global LOD was set to the 95% quantile of all primer specific detection limits (LOD = 23).

#### RNA Processing and Single-cell qRT-PCR

96.96 Dynamic Arrays (Fluidigm) were used to capture C<sub>T</sub> values of 185 primer pairs from 1,056 E15 (192 P0, 192 P7) chicken utricular single cells with the Biomark HD system (Fluidigm) as previously described (Durruthy-Durruthy et al., 2014). Two 96-well plates were matched to enable the quantification of the whole gene assay (96 cells × 185 primer pairs) per cell.

#### Quality Control and Data Processing

First, we evaluated the amplicons generated by the 185 selected primer pairs. Measurements not generating fluorescence signals or melting curves outside the validated temperature range (implying non-specific amplicons) were treated as absent data and set to the technical limit of detection, C<sub>T</sub> = 30. Cells were filtered and normalized using the reference gene *GAPDH*, as its mRNA levels have

been reported to be constant during chick hair bundle development (Avenarius et al., 2014). We removed dying cells or multiplets indicated by significant lower ( $< 25\%$  quantile  $- 1.5 \times$  interquartile range) or higher ( $> 75\%$  quantile  $+ 1.5 \times$  interquartile range) *GAPDH* levels compared to all captured cells, respectively (E15: 48 cells; P0: 14 cells; P7: 16 cells); the *GAPDH* distribution was computed without non-detects. Two genes, *GFI1* and *PKD2L1*, were found not expressed in any cell and were therefore excluded from the subsequent analysis.  $C_T$  values  $\geq$  LOD were set to 0 (i.e., no signal detected); remaining  $C_T$  values were transformed to a log-scale transcript level above background ( $\Delta C_T = \text{LOD} - C_T$ ), which is referred to as Log2Ex. Normalized expression values for each cell  $i$  were derived by  $\Delta\Delta C_T(i) = \Delta C_T(i) - \Delta C_T^{\text{GAPDH}}(i)$ . To ensure linear molecule counts  $> 1$  (i.e.,  $\Delta\Delta C_T > 0$ ), we scaled each  $\Delta\Delta C_T(i)$  by

$$\Delta\Delta C_T(i) = \Delta\Delta C_T(i) + \min(\Delta C_T) + |\min(\Delta\Delta C_T)|$$

A Kolmogorov-Smirnov goodness-of-fit test indicated that E15  $\Delta\Delta C_T$  values of 77% of genes followed a normal distribution (Bonferroni corrected  $\alpha = 10^{-2}$ ). Finally, we obtained a Log2Ex expression matrix  $\mathbf{X} = (x_{ij}) \in \mathbb{R}^{m \times n}$  of  $m$  observations (E15: 1,008 cells; P0: 178 cells; P7: 176 cells) for  $n = 183$  features (genes) with

$$x_{ij} = \begin{cases} 0, & C_T \geq \text{LOD} \\ \Delta\Delta C_T, & \text{otherwise.} \end{cases}$$

Hierarchical clustering was applied (complete linkage agglomeration with Euclidean distance metric) to check for batch effects.  $\mathbf{X}$  contained a considerable fraction of non-detected values, i.e.,  $x_{ij} = 0$  (E15: 35.0%; P0: 23.0%; P7: 23.8%). We noted a linear relation between the number of non-detects and the mean  $\Delta\Delta C_T$  value per gene ( $R^2 = 0.28$ ; F-test  $p < 7.6 \times 10^{-15}$ ) for the E15 data, which suggested that a fraction of the non-detected values is due to limited technical sensitivity and thus is type I left-censored.

### The CellTrails Framework

Input to CellTrails is any normalized expression matrix  $\mathbf{X} = (x_{ij}) \in \mathbb{R}^{m \times n}$ , which is composed of measurements of  $n$  genes/transcripts that are presumed to trace a spatiotemporal trajectory in  $m$  cells. In the following,  $\mathbf{x}_i$  denotes a row vector of size  $n$  with all expression values of cell  $i$ , and  $\mathbf{x}_j$  is a column vector of size  $m$  containing all measurements of gene  $j$ .

### Dimensionality Reduction

Single-cell gene expression data comprise high-dimensional data of large volume, i.e., many genes are measured in many cells; or more formally,  $m$  cells can be described by the expression of  $n$  genes (i.e.,  $n$  dimensions). The genes' expression profiles are shaped by many distinct unobserved biological causes related to each cell's geno- and phenotype, such as developmental age, tissue region of origin, cell cycle stage, as well as extrinsic sources such as status of signaling receptors, and environmental stressors, but also technical noise. In other words, a single dimension, despite just containing gene expression information, represents an underlying combination of multiple dependent and independent, relevant, and non-relevant factors, whereat each factors' individual contribution is non-uniform. To obtain a better resolution and to extract underlying information, we aim to find a meaningful low-dimensional structure – a manifold – that represents cells mainly by their spatial and temporal relation. We reduce the dimensionality of the dataset  $\mathbf{X}$ , which consists of  $m$  data vectors  $\mathbf{x}_i$ , with  $i \in [1, m]$  of dimensionality  $n$ , under the assumption that  $\mathbf{X}$  has an intrinsic dimensionality of  $d$ , where  $d < n$  or even  $d \ll n$ . In other terms, we presume that the data vectors are lying on or near a manifold with dimensionality  $d$  that is embedded in the  $n$ -dimensional space. Thus, we aimed to amplify latent spatiotemporal information by reducing noise (non-relevant dimensions) by transforming  $\mathbf{X}$  into a new dataset  $\mathbf{Y} = (y_{ij}) \in \mathbb{R}^{m \times d}$  while retaining the geometry of the dataset as much as possible. However, dimensionality reduction is an ill-posed problem, because neither the geometry of the data manifold, nor the value of  $d$  is known. Since we were interested in spatiotemporal ordering of cells, we aimed to robustly capture the intrinsic data geometry based on the statistical dependency between any two data vectors. A high dependency should represent a close proximity of two cells along a trajectory.

For this purpose, we used mutual information, which is robust against outliers and noise, and is sensitive to nonlinear relations, which cannot be detected by covariance-based measures. We argue that mutual information is well suited to describe developmental progression, as it quantifies the amount of uncertainty about the current cell state that is removed by the occurrence of its progenitor cell state. If a mutual relationship between two cells is non-existent, they are statistically independent and consequently considered as distant. We model  $\mathbf{x}_i$  as a random variable  $A$  with a defined finite set of a possible outcomes (e.g., discrete expression intensity levels) and its probability mass function  $P(A)$  which is based on the relative frequencies of each outcome. For each data vector, we can then compute the Shannon entropy (Shannon, 1948)  $H(A)$ :

$$H(A) = \sum_{i=1}^a P(A_i) \log_2 P(A_i)$$

Frequent outcomes, such as non-detects, have a low contribution to the total sum, as the information content  $I(A_i) = \log_2 P(A_i) \rightarrow 0$  for  $P(A_i) \rightarrow 1$ . The amount of information needed to describe the outcome of cell  $\mathbf{x}_1$ , if another cell  $\mathbf{x}_2$  has been observed can be quantified by the conditional entropy:

$$H(A^{(1)} | A^{(2)}) = - \sum_{i=1}^a \sum_{j=1}^a P(A_i^{(1)} | A_j^{(2)}) \log_2 P(A_i^{(1)} | A_j^{(2)})$$

The statistical dependence between two cells in terms of their mutual information can then be estimated by



$$I(A^{(1)}; A^{(2)}) = H(A^{(1)}) - H(A^{(1)} | A^{(2)}) = H(A^{(2)}) - H(A^{(2)} | A^{(1)}) = I(A^{(2)}; A^{(1)})$$

with  $H(A^{(1)} | A^{(2)}) = H(A^{(1)})$  if  $\mathbf{x}_1$  and  $\mathbf{x}_2$  are statistically independent and therefore spatiotemporally unrelated. The entropy framework naturally requires discretization of data vectors by an indicator function  $\phi(x_{ij})$  which assigns each continuous data point (expression value)  $x_{ij}$  to exactly one discrete interval (e.g., low, mid or high). However, measurement points located close to the interval borders may get wrongly assigned due to noise-induced fluctuations. Therefore, we fuzzified  $\phi(x_{ij})$  by using a piecewise polynomial function  $F(\mathbf{x}_i)$ , i.e., the domain of  $\mathbf{x}_i$  is divided into contiguous intervals, whereat  $F$  is represented by a separated polynomial in each interval (Daub et al., 2004). This allows a data point to be simultaneously in multiple neighboring intervals, which increases the robustness of this scoring scheme. Expressions for the polynomial segments were derived by the Cox-de Boor recursion formula of B-spline basis functions:

$$B_{z,0}(x_{ij}) = \begin{cases} 1, & t_z \leq x_{ij} < t_{z+1} \\ 0, & \text{otherwise.} \end{cases}$$

$$B_{z,c}(x_{ij}) = \frac{x_{ij} - t_z}{t_{z+c} - t_z} B_{z,c-1}(x_{ij}) + \frac{t_{z+c+1} - x_{ij}}{t_{z+c+1} - t_{z+1}} B_{z+1,c-1}(x_{ij})$$

with degree 3 (i.e., index  $c$  runs in  $\{1, 2, 3\}$  resulting in cubic splines), and a sorted uniform knot vector  $\mathbf{t} = \{t_z | z \in \mathbb{Z}\}$ . We composed  $\mathbf{t}$  as follows. We generated eight equidistant knots over the range of  $\mathbf{x}_i$ ;  $\{t_0 = \min(\mathbf{x}_i), \dots, t_7 = \max(\mathbf{x}_i)\}$ . Due to the inflation of non-detected values in single-cell data, most likely  $t_0 = 0$ . Therefore, we selected the internal knot vector  $\mathbf{t} = \{t_z | z \in [0, 6]\}$  and the boundary knots  $t_0$  and  $t_7$ . Due to the recursive nature of B-splines the lower and upper boundary knots have to be appended (degree + 1) times to  $\mathbf{t}$ , resulting in  $2 \times \text{degree} + 2 + |\mathbf{t}| = 15$  knots generating 10 basis functions (without intercept  $B_{0,c}$ ). The B-spline basis transformation of the expression matrix  $\mathbf{X}$  results in the basis matrix  $\mathbf{B} = (b_{ijk}) \in \mathbb{R}^{m \times n \times 10}$ . We adjust the computation of the marginal and joint probabilities for an outcome  $k$  as follows:

$$P(A_k) = \sum_{j=1}^n \frac{b_{j,k}}{n}, \text{ and } P(A_k^{(1)}, A_k^{(2)}) = \sum_{j=1}^n \frac{b_{1,j,k} b_{2,j,k}}{n}.$$

We then derive the weighted mutual information between any two cells by

$$I(A^{(1)}; A^{(2)}) = \sum_{i=1}^{10} \sum_{j=1}^{10} \omega(A_i^{(1)}, A_j^{(2)}) P(A_i^{(1)}, A_j^{(2)}) \log_2 \left( \frac{P(A_i^{(1)}, A_j^{(2)})}{P(A_i^{(1)}) P(A_j^{(2)})} \right)$$

with weight function  $\omega(A_i^{(1)}, A_j^{(2)}) = (1 - P(A_i^{(1)}))(1 - P(A_j^{(2)}))$ . The resulting matrix  $M = (m_{ij}) \in \mathbb{R}^{m \times m}$  already contains valuable information about cell-to-cell relations. However, the computed mutual information is left-bounded and composed of bits. Therefore, similar to the derivation of a Pearson correlation coefficient from a covariance matrix, we scaled the mutual information matrix  $\mathbf{M}$ , which enables its interpretation as generalized correlation coefficient:

$$F(m_{ij}) = m_{ij} \sqrt{\frac{1}{m_{ii} m_{jj}}} \in [0, 1]$$

with  $F(m_{ij}) = 0$  denotes statistical independence. From this, we can formulate a non-negative, symmetric distance function between two cells  $(i, j)$  by

$$D(i; j) = \sqrt{2(1 - m_{ij})} \in [0, \sqrt{2}]$$

with  $D(i, j) = 0$  implies that  $i = j$ . Of note, we found that the triangle-inequality was valid for each distance matrix  $\mathbf{D} = (d_{ij}) \in \mathbb{R}^{m \times m}$  derived from the datasets analyzed in this study, indicating that function  $D$  may satisfy the requirements of a metric; however, a formal proof is not provided within the scope of this study.

Next, we conducted the mapping  $\psi: \mathbf{X} \rightarrow \mathbf{Y} = (y_{ij}) \in \mathbb{R}^{m \times d}$  by using the idea of Laplacian eigenmaps (Belkin and Niyogi, 2003). Here, the cost function that is minimized is given by

$$F(\mathbf{Y}) = \|y_i - y_j\|_2 \omega_{ij} = 2\mathbf{Y}^T \mathbf{L} \mathbf{Y}$$

where  $\mathbf{L}$  is the Laplacian of a corresponding weighted graph  $G = (V, E, W)$  and  $\omega_{ij}$  are weights that are chosen such that data vectors, which were defined proximal in the original space remain close-by in the lower-dimensional representation. The minimization of  $F$  can be defined as generalized eigenvector problem using spectral graph theory  $\mathbf{L}\mathbf{v} = \lambda\mathbf{Q}\mathbf{v}$  with the degree matrix  $\mathbf{Q}$  of  $G$ . We extend the original local concept as follows. First, instead of using a sparse (weighted) adjacency graph (e.g.,  $k$ -nearest neighbor graph), we

constructed a simple complete graph with  $m$  nodes, one for each data vector (i.e., cell), and weighted each edge between two nodes ( $i, j$ ) by a heat kernel function  $F$  applied on  $\mathbf{D}$ :

$$F(d_{ij}) = e^\gamma, \text{ with } \gamma = \frac{1}{2\sigma^2} d_{ij}^2$$

and a scaling factor  $\sigma$  which was set to the third quartile of  $\mathbf{D}$ , i.e., the distance matrix is transformed to a weighted adjacency matrix with exponentially decaying values ( $F: \mathbf{D} \rightarrow \mathbf{D} = (d_{ij}) \in \mathbb{R}^{m \times m}$ ). Second, we operate the spectral embedding directly on this adjacency matrix (Sussman et al., 2012), by computing an eigendecomposition of matrix  $\mathbf{L}'$  which is given by  $\mathbf{L}' = \frac{1}{m} \mathbf{Q} + \mathbf{D}$  (comparable to a signless graph Laplacian). Here, the (ordered) set of eigenvalues provides the spectrum of the graph. Third, the resulting eigenbasis  $\mathbf{Y}$ , obtained by concatenation of the first  $d$  eigenvectors, is coordinate-scaled (Sussman et al., 2012) by the reverse inverse hyperbolic sine of the eigenvalues  $\lambda$ :

$$F(y_{ij}) = y_{ij} \log \left( \lambda_j + \sqrt{\lambda_j^2 + 1} \right)$$

To detect the number of relevant dimensions automatically, we computed the eigengaps (lagged differences of sorted  $\lambda$ ) and calculated a linear fit on the top 100 values. The top  $d$  eigenvectors having an eigengap greater than the fitted values were selected to span the eigenbasis  $\mathbf{Y} = (y_{ij}) \in \mathbb{R}^{m \times d}$ .

### Identification of States

To identify cellular subpopulations, we performed hierarchical clustering via minimization of a square-error criterion (Ward, 1963) in the lower-dimensional space  $\mathbf{Y} = (y_{ij}) \in \mathbb{R}^{m \times d}$ . To determine the cardinality of the clustering, we conducted an unsupervised post hoc analysis. This has the advantage that branches of the dendrogram tree are pruned by individual heights while the overall cluster-to-cluster structure remains intact. We determined the clustering cardinality unbiasedly using a biological paradigm. Here, we assumed that differential expression of assayed genes determines distinct cellular states. First, we identified the maximal fragmentation of the data space, i.e., the lowest cutting height in the clustering dendrogram that ensured that the resulting clusters contained at least 1% of all cells. Then, processing from this height toward the root, we iteratively joined siblings if they did not have at least five differentially expressed genes. Statistical significance was tested either by means of a two-sample non-parametric Peto-Peto test (R package *EnvStats*) to account for censored values, or by its uncensored analog, the Wilcoxon rank sum test, if all Log2Ex values were greater than 0. The null hypothesis was rejected using the Benjamini-Hochberg procedure for a significance level of  $\alpha = 10^{-4}$ . Parameters were selected based on number and covariance of genes (redundancy), and sample size (statistical power).

### Multiple Differential Gene Expression Analysis

Each cluster  $c$  found in the lower dimensional space  $\mathbf{Y}$  is composed of a distinct set of  $u$  cells. Therefore, it also defines a submatrix of expression matrix  $\mathbf{X}$  that is composed of a distinct set of  $u$  data vectors  $\mathbf{X}^{(c)} = (x_{ij}^{(c)}) \in \mathbb{R}^{u \times n}$ . To identify genes that are significantly high expressed per cluster, we performed a multiple differential gene expression analysis, i.e., comparing one cluster against all simultaneously, rather than conducting  $0.5k(k-1)$  pairwise comparisons for  $k$  clusters. First, we computed the mean expression per gene for any cluster  $c$ , i.e., its barycenter  $\mu^{(c)}$  by

$$\mu^{(c)} = \frac{1}{u} \mathbf{J}_{1,n} \mathbf{X}^{(c)}$$

with  $\mathbf{J}_{1,n}$  is all-ones unit matrix with one row and  $n$  columns. Then, we computed the complementary barycenter  $\mu^{(-c)}$  of all cells that were not assigned to cluster  $c$ . From this, we can define a differential expression score  $DE$  for each gene  $j$  in each cluster  $c$  by

$$DE(j; c) = \gamma_j^{(c)} \left( \mu_j^{(c)} - \mu_j^{(-c)} \right) \in [-1, 1]$$

with scaling factor  $\gamma$  which was defined as

$$\gamma_j^{(c)} = \begin{cases} \left( \mu_j^{\{max\}} - \mu_j^{\{-max\}} \right)^{-1}, & \mu_j^{(c)} \geq \mu_j^{\{-c\}} \\ \left( \mu_j^{\{min\}} - \mu_j^{\{-min\}} \right)^{-1}, & \text{otherwise.} \end{cases}$$

Here,  $\mu_j^{\{max\}}$  is the highest possible and  $\mu_j^{\{min\}}$  is the lowest possible mean expression value in the whole dataset for gene  $j$  in a cluster of size  $u$ , and  $\mu_j^{\{-max\}}$  and  $\mu_j^{\{-min\}}$  are the average expression values in the remaining cells, respectively. If  $DE(j; c) = 1$  then cluster  $c$  contains all cells having the  $u$  highest values of gene  $j$ , if  $DE(j; c) = -1$  then cluster  $c$  contains all cells having the  $u$  lowest values of gene  $j$ . To test for statistical significance, we performed 1,000 Monte Carlo simulations. For each iteration we calculated  $DE(j; c)$  for  $u$  sampled cells. If neither random cluster exhibited a higher score (or lower score if  $\mu_j^{(c)} < \mu_j^{\{-c\}}$ ), then the null hypothesis was rejected. Further, we calculated the specificity of  $DE(j; c)$  as follows:

$$S(j; c) = \frac{2\eta}{k-1} - 1 \in [-1, 1]$$

with  $k$  is the total number of clusters and  $\eta$  is the number of clusters having a lower  $DE$  score for gene  $j$ . Here,  $S(j; c) = 1$  indicates that gene  $j$  is highly specific overexpressed in cluster  $c$ . A gene  $j$  was defined as marker for cluster  $c$ , if  $DE(j; c) > 0.5$ , Monte Carlo  $p < 10^{-3}$ , and  $S(j; c) = 1$ .

### Trajectory Fitting

We assume that the arrangement of cells in the lower-dimensional space  $\mathbf{Y} = (y_{ij}) \in \mathbb{R}^{m \times d}$  constitutes a trajectory. Therefore, we aim to place single cells along a maximum parsimony tree, which resembles a branching developmental continuum. Distances between cells in the lower-dimensional space are computed using the  $L^2$ -norm (Euclidean distance). To avoid overfitting and to facilitate the accurate identification of bifurcations, we simplify the problem. Analogous to the idea of a ‘broken-stick regression’, we group the data and perform linear fits to separate trajectory segments, which are determined by the branching chronology of states. This leaves us with the optimization problem of finding the minimum number of associations between states maximizing the total parsimony, which in theory can be solved by any minimum spanning tree algorithm. We adapt this concept by assuming that adjacent states should be located nearby and therefore share a relative high number of neighboring cells. Each state  $c$  defines a submatrix of  $\mathbf{Y}$  that is composed of a distinct set of  $u$  data vectors  $\mathbf{Y}^{(c)} = (y_{ij}^{(c)}) \in \mathbb{R}^{u \times d}$ , i.e., state  $c$  is a distinct set of  $u$  cells represented in the lower-dimensional space. For each state we identify the 10-nearest neighbors ( $\mathbf{N}^{(c)} \subseteq \mathbf{Y}$ ) to each data vector  $y_i^{(c)}$  and took note of their state memberships ( $\mathbf{u}^{(c)}$ ) and distances ( $\mathbf{d}^{(c)}$ ). This results in two vectors ( $\mathbf{u}^{(c)} \in \mathbf{U}$ ,  $\mathbf{d}^{(c)} \in \mathbf{D}$ ) of length  $10u$  per cluster  $c$ . We remove spurious neighbors (outliers), which fulfill the condition

$$d_i^{(c)} \geq e^{\text{median}(\log(\mathbf{D})) + \text{MAD}(\log(\mathbf{D}))}$$

where  $MAD$  is the median absolute deviation function applied on the log-transformed matrix  $\mathbf{D}^{m \times 10}$  of all recorded neighborhood distances. For each state  $c$  we calculate the relative frequency table of  $\mathbf{u}^{(c)}$ , which we refer to as the interface cardinality scores of  $c$ . We implement a greedy algorithm to find the tree maximizing the total interface cardinality score, similar to a minimum spanning tree algorithm (Kruskal, 1956). In a nutshell, all interface cardinality scores are organized in a sorted linked list, and a graph with no edges, but  $k$  nodes (one for each state) is initialized. During each iteration the highest score is selected, removed from the list and its corresponding edge (connecting two states), if it is not introducing a cycle or is already existent, is added to the graph. The algorithm terminates if the size of the graph is  $k - 1$  or the list is empty. A cycle is determined if nodes were revisited while traversing the graph using depth-first search. Please note that any state  $c$  can become isolated (degree = 0) if  $\mathbf{N}^{(c)} \subseteq \mathbf{Y}^{(c)}$ , i.e., all its nearest neighbors are exclusively members of the same state  $c$ . Data vectors of isolated states are removed from  $\mathbf{X}$  and  $\mathbf{Y}$  for subsequent steps, respectively. The resulting tree spanning all non-isolated states defines the topology of the trajectory. Next, we embed the trajectory structure in  $\mathbf{Y}$  by computing  $k - 1$  straight lines passing through  $k$  mediancenters  $\mu$  (Bedall and Zimmermann, 1979) of adjacent states. Then, we learn a fitting function  $\varphi: \mathbf{Y} \rightarrow \mathbf{Z} = (z_{ij}) \in \mathbb{R}^{m \times d}$ . Each  $y_{ij}^{(c)}$  is orthogonally projected on its closest line passing through  $\mu^{(c)}$  (the mediancenter of  $c$ ). Here, whenever possible, projections on line segments between two mediancenters are preferred. Residuals (fitting deviations) are given by  $(y_i - z_i)^2$ . Finally, a weighted acyclic trajectory graph  $G = (V, E, W)$  with  $|V| = m$  can be constructed based on each cell’s position along its straight line; each edge is weighted by the distance between each adjacent cell in  $\mathbf{Z}$ . Of note,  $\varphi$  implies potential leafs branching from internal states in the trajectory graph encompassing cellular heterogeneity of a state.

### Drawing of Cell Trails Maps

We intend to portray a computed trajectory as collection of trails that can be found in a landscape that is shaped by individual gene expression dynamics. To generate such a topographic map, we first generate a two-dimensional spatiotemporal ordination  $\mathbf{O} = (o_{ij}) \in \mathbb{R}^{m \times 2}$  of the expression matrix  $\mathbf{X} = (x_{ij}) \in \mathbb{R}^{m \times n}$  using structural information from the trajectory graph  $G$ . We determine the spatial coordinates of each cell based on their location along the trajectory,  $\vartheta(\mathbf{x}_i) = (o_{i1}, o_{i2})$ , i.e., we draw a map of all observed trails in the data. For this purpose, we load the structural properties of  $G$  into the graph editing software yEd (<http://www.yworks.com>) to make use of a layout algorithm optimized for undirected, dense or huge trees, called ‘balloon’ style. This method roots the trajectory graph in a quasi-radial style, which we found is optimally suited for the subsequent procedure. Here, we adjust the local distances between data points in  $\mathbf{O}$ , such that the layout accurately represents the weight of the edges (i.e., pseudotime) between adjacent nodes (i.e., cells) in  $G$ :

- (1) The dimensions of the layout are scaled, such that the axes’ range is identical and the minimum Euclidean distance between adjacent data points in  $\mathbf{O}$  is greater than the maximum geodesic distance between adjacent nodes in  $G$ .
- (2) We identify all leafs  $V_1$  (nodes with degree = 1) and all internal nodes  $V_2$  (degree > 2) in  $G$ . If  $V_2 = \{\}$ , then one node is sampled from  $V_1$  and gets assigned to  $V_2$ .
- (3.1) If  $|V_2| > 1$ , then a minimum spanning tree  $T_2 = (V_2, E)$  is computed based on the geodesic distances of  $V_2$  in  $G$ . For each edge in  $T_2$ , the shortest path  $P \subseteq G$  between both incident nodes is computed in  $G$  using Dijkstra’s algorithm. Then, for each node along  $P$  (with layout coordinates  $\mathbf{o}_1$ ), the layout coordinates,  $\mathbf{o}_2 \in \mathbf{O}$ , of its adjacent node get adjusted, such that the distance between  $\mathbf{o}_1$  and  $\mathbf{o}_2$ , equals the weight  $w$  of their incident edge in  $G$ :

$$\mathbf{o}_2 = \mathbf{o}_1 + \frac{w(\mathbf{o}_1 - \mathbf{o}_2)}{\|\mathbf{o}_1 - \mathbf{o}_2\|}$$



- (3.2) If the edge with the endpoint of  $P$ ,  $v_{k-1}v_k$ , is reached, the vector difference  $\delta$  between the original and adjusted coordinates of  $\mathbf{o}_k$  is recorded. Since  $G$  is a tree, the vertex-induced subgraph of  $G$  with  $V \setminus \{v_k\}$  is disconnected. Since we iterated directly through  $P$  from a start to an endpoint  $\in V_2$ , we select the component not containing  $P$ , and adjust its nodes in  $\mathbf{O}$  by adding  $\delta$  to their layout coordinates.
- (4) For each internal node  $\in V_2$ , a tree  $T_2$  spanning the internal node and its closest leaf  $\in V_1$  is created based on their geodesic distances in  $G$ . We update  $\mathbf{O}$  identical to step (3.1) using  $T_2$ , but require iterating through  $P$  from the internal node to the leaf node.

Next, we generate smoothed expression surfaces for individual genes, i.e., the map topography. We extend the map by adding a dense equal-spaced regular grid of size  $300 \times 300$ ,  $\hat{\mathbf{O}} = (\hat{\mathbf{o}}_{ij}) \in \mathbb{R}^{90,000 \times 2}$ , with  $\hat{\mathbf{o}}_{ij} \in [\min(\mathbf{o}_j), \max(\mathbf{o}_j)]$ . This raises the problem of predicting a gene's presumptive expression value for each grid point  $\hat{\mathbf{o}}_{i,j}$ , by learning a regression function from the spatial location of individual cells in  $\mathbf{O}$  and their associated gene expression vectors  $\mathbf{x}_i$ . For this purpose, we employ an extension of the multiple linear regression model, called generalized additive model (GAM). It allows for nonlinear relationships between each covariate and the response variable by replacing each linear component with a smooth nonlinear function. For each gene  $j$  a GAM  $\zeta_j$  is fitted with a single smoothing term  $F$  of the spatial coordinates of cell  $i$  in  $\mathbf{O}$ :

$$\mathbb{E}(x_{ij}) = \beta_0 + F(\mathbf{o}_i) + \varepsilon_i$$

where  $\beta_0$  is a coefficient and  $\varepsilon_i$  is an identical and independent distributed random error term. We use isotropic (i.e., same parameters for both map dimensions) thin-plate spline smoothing with 10 basis dimensions to estimate  $F$  and fit its parameters by generalized cross-validation using the R package *mgcv*. Here, for each gene  $j$  we introduce prior weights  $\mathbf{p}_j$  to lower the confounding effect of drop-outs ( $x_{ij} = 0$ ) to the maximum-likelihood-based fitting process:

$$p_{hj} = \begin{cases} \frac{\left| \left\{ \mathbf{x}_{ij}^{(c)} \in \mathbf{X}^{(c)} : x_{ij}^{(c)} = 0 \right\} \right|}{|\mathbf{X}^{(c)}|}, & x_{hj} = 0 \\ 1, & \text{otherwise.} \end{cases}$$

where cell  $h$  is member of state  $c$  and  $\mathbf{X}^{(c)}$  are expression vectors of all cells of the trajectory (or a trail) that are member of state  $c$ ; in other words, each non-detect of gene  $j$  in state  $c$  is weighted by the relative fraction of non-detects of gene  $j$  in state  $c$  along the trajectory (or a trail). Each grid point  $\hat{\mathbf{o}}_i$  has then a corresponding expression vector  $\hat{\mathbf{x}}_i = (\zeta_1(\hat{\mathbf{o}}_i), \dots, \zeta_n(\hat{\mathbf{o}}_i))$  for  $n$  genes with  $\mathbf{L}_i$  is the vector with the values of the linear predictors at the supplied covariate values (i.e., coordinates), and  $\beta$  are the estimated coefficients for each parameter. Maps are post-processed, such that the expression interval of the predicted response variable is right-bound by the maximum of its fitted expression values along the trajectory and left-bound by 0. Thus, we neither project expression values in any region of the map that are greater than those fitted in any cell on the trajectory, nor lower than a non-detected expression signal (which corresponds to a value of 0). Uncertainty estimates for quantities derived from fitted GAM predictions were calculated based on the Bayesian posterior covariance matrix of the fitted model coefficients,  $\mathbf{V}$ . Here, the standard errors of predictions were calculated by  $\sqrt{\mathbf{L}_i \mathbf{V} \mathbf{L}_i}$  for grid point  $\hat{\mathbf{o}}_i$  of the gene expression surface (Wood, 2006).

### Inference of Gene Expression Dynamics

To analyze gene expression dynamics of developmental progression toward distinct phenotypes, i.e., gene expression profiles along individual linear trajectories (trails), we make use of the structural information contained in the trajectory graph  $G = (V, E, W)$ . Here, the shortest path from a given start node  $v_0$  to a given end node  $v_k$  denotes a single trail,  $(v_0, e_0, \dots, e_{k-1}, v_k)$ . Here, the sequence of nodes  $\mathbf{v} = (v_0, \dots, v_k)$  represents gene expression snapshots  $\mathbf{X} = (\mathbf{x}_0, \dots, \mathbf{x}_k)$  taken from various states  $\mathbf{c} = (c_0, \dots, c_k)$  and the sequence of weighted edges  $\mathbf{e} = (e_0, \dots, e_{k-1})$ , connecting those nodes, approximates the pseudotime between single snapshots  $\mathbf{w} = (w_0, \dots, w_{k-1} \in W)$ . The pseudotime vector  $\mathbf{t} = (t_0, \dots, t_k)$  is then defined by the geodesic distance from  $v_0$  by

$$t_h = \begin{cases} \sum_{i=0}^{h-1} w_i, & h > 0 \\ 0, & \text{otherwise.} \end{cases}$$

To learn the expression level of each gene as a function of pseudotime, we used generalized additive models with a single smoothing term with five basis dimensions (thin-plate regression spline) and introduced prior weights to lower confounding effects of drop-outs (see above: *Drawing of CellTrails Maps*).

### Differential Trail Analysis

We hypothesized that it would be feasible to analyze differences and similarities in gene expression dynamics by comparing different trails. Genes have non-uniform expression rates and each trail has a distinct set of upregulated genes, but also contains unequal numbers of cells. Because pseudotime is based on transcriptional change, its axis may be distorted, leading to stretched or compressed sections of longitudinal expression data that make comparison of trails challenging. To align different trails, despite these differences, we employ a dynamic programming based algorithm that has long been known in speech recognition, called dynamic time warping (Sakoe and Chiba, 1978). RNA expression rates are modeled analogous to speaking rates (Aach and Church, 2001); the latter accounts for innate nonlinear variation in the length of individual phonemes (*here*: states) resulting in stretching and shrinking of word (*here*: trail) segments. This allows the computation of inter-trail alignment warps of individual expression time series that are

similar but locally out of phase. Please recall, a trail is defined as a chronologically ordered sequence of cells  $\mathbf{v} = (v_0, \dots, v_k)$  representing gene expression snapshots at distinct points in pseudotime  $\mathbf{t} = (t_0, \dots, t_k)$ ; an expression snapshot is a data vector containing measurements of  $n$  genes, where  $\mathbf{x}_j = (x_{0j}, \dots, x_{kj})$  denotes the expression sequence of a particular gene  $j$ . We calculated univariate pairwise alignments of two trails,  $(\mathbf{v}_1, \mathbf{t}_1, \mathbf{x}_j)$  and  $(\mathbf{v}_2, \mathbf{t}_2, \mathbf{y}_j)$ , resulting in  $n$  warps per trail set as follows.

Expression values were fitted and smoothed using generalized additive models for each trail  $tr$ ,  $\zeta_{j,tr}$  (GAMs; see above: *Inference of Gene Expression Dynamics*). We normalized the smoothed expression value vectors by  $\mathbf{x}_j = \zeta_{j,1}(\mathbf{t}_1)/\max(\zeta_{j,1}(\mathbf{t}_1))$  and  $\mathbf{y}_j = \zeta_{j,2}(\mathbf{t}_2)/\max(\zeta_{j,2}(\mathbf{t}_2))$ ; the time series with maximum pseudotime,  $\max(\mathbf{t}_1, \mathbf{t}_2)$ , was used as query sequence. The cross-distance matrix between  $\mathbf{x}_j$  and  $\mathbf{y}_j$  was calculated by applying the Euclidean distance function  $D(x_{gj}, y_{hj})$  on any snapshot  $g$  of time series  $\mathbf{x}_j$  and any snapshot  $h$  of time series  $\mathbf{y}_j$  of gene  $j$ . DTW fits a warping function which minimalizes the total distance between  $\mathbf{x}_j$  and  $\mathbf{y}_j$

$$\vartheta(i) = (\vartheta_x(i), \vartheta_y(i))$$

where  $\vartheta_x(i) \in \mathbf{x}_j$  and  $\vartheta_y(i) \in \mathbf{y}_j$  are the individual snapshots aligned at position  $i$  of the alignment, i.e.,  $\vartheta_x$  and  $\vartheta_y$  remap the time indices of the expression series. Similar to a (global) pairwise protein sequence alignment, monotonicity (i.e., no time loops) and continuity (i.e., no time leaps) constraints have to be imposed on  $\vartheta$  to preserve sequence ordering. We use asymmetric dynamic programming, as provided by the R package *dtw*, to compute the optimal warp. Its recursion rule selects the local minimum of three moves through the dynamic programming matrix: suppose that query snapshot  $g$  and reference snapshot  $h$  have already been aligned, then the alignment of  $h + 1$  with  $g + 1$  is a (unit slope) diagonal move,  $h$  with  $g + 1$  denotes an expansion by repetition of  $h$ , and  $h + 2$  with  $g + 1$  contracts the query by dropping  $h + 1$ .

The resulting alignment may contain gaps. Therefore, we imputed missing values using smoothed spline functions with  $l - 1$  degrees of freedom, with  $l$  is the minimum length of aligned time indices. The overall dissimilarity between two expression time series (i.e., the difference of a gene's dynamic between two trails) was estimated by predicting expression values for  $k = 250$  equally distant time points over the warped time span,  $\vartheta$ , and by calculating their root-mean-square deviation (RMSD).

$$RMSD(\vartheta) = \sqrt{\frac{\sum_{i=1}^k (\vartheta_x(i) - \vartheta_y(i))^2}{k}}$$

## Robustness Analysis

### Robustness With Respect to Sample Size

We analyzed the robustness of the CellTrails framework with respect to sample size. We generated bootstrap samples by sampling without replacement from all 896 cells that were used to reconstruct the trajectory of hair bundle development. 100 subsets composed of 75% and 100 subsets composed of 50% of the data were generated. Each bootstrap sample was input to CellTrails and the pseudotime of each cell was computed automatically. To quantify how accurately CellTrails recovers the original trajectory from bootstrap samples, the concordance between the pseudotime labels of a subset and the pseudotime of the original trajectory was estimated by Kendall's rank correlation coefficient.

### Robustness Against Variable Noise

We analyzed the robustness of spectral embedding against variable noise. To add noisy dimensions to the expression dataset  $\mathbf{X} = (x_{ij}) \in \mathbb{R}^{m \times n}$  with  $m$  cells and  $n$  genes, we sampled  $k$  data vectors of genes (without replacement), shuffled each vector, and added the mock data to  $\mathbf{X}$ . The number of sampled gene vectors was determined by

$$k = \left\lceil \frac{n}{(1-p)} + 0.5 \right\rceil - n$$

where  $p$  is the fraction of noise which was selected 5%, 10% and 20%. To quantify robustness, the average absolute Spearman rank correlation between the top 10 latent dimensions derived from the original data and the top 10 latent dimensions derived from the data with a certain noise fraction was computed; quantification was repeated 100 times per noise level.

### Robustness Against Expression Noise

We analyzed the robustness of spectral embedding against expression noise. We sampled  $m \times n$  values from a Normal distribution  $N(\mu = 5, \sigma)$  with  $\sigma \in \{1, 2, 3\}$  and added them to the expression matrix  $\mathbf{X} = (x_{ij}) \in \mathbb{R}^{m \times n}$ ; resulting negative values were set to 0 (drop-outs). The average absolute Spearman rank correlation between the top 10 latent dimensions derived from the original data and the top 10 latent dimensions derived from the data with a certain noise fraction was computed; quantification was repeated 100 times per noise level.

## Processing and Analysis of Other Datasets

### Single-cell RNA-Seq Data from Mouse Utricles

Transcript expression profiles of  $n = 313$  single cells from the sensory organs of the inner ear of P1 Lfng<sup>EGFP</sup>;R26R<sup>CAG-tdTomato</sup>; Gfi1<sup>Cre</sup> mice (Burns et al., 2015) were obtained via accession number GEO: GSE71982 (<https://www.ncbi.nlm.nih.gov/geo/>). Transcript abundances in this dataset have been reported in sum of isoform transcripts per million (TPM). We calculated the library size (total number of TPM) and the number of detected genes per cell, and performed density-based clustering using DBSCAN

with an epsilon neighborhood of 0.7 (as provided by the R package *dbscan*) on the principal component space of these two variables to identify three outlying cells, which were removed consequently. We filtered 16,918 genes, which were expressed in at least three cells. Additional three cells predicted to be in S or G2M phase of the cell cycle by *cyclone* of the R package *scrna* were removed. Similar to the original study, normalization factors for each sample were calculated. Size factors were robustly deconvolved from pooled cells and the expression matrix was subsequently normalized using *scrna* and *scater*. Finally, we retained 14,313 genes annotated as protein-coding by GENCODE (release M15, <https://www.genecodegenes.org/>), and selected all 53 supporting cells and 67 hair cells from the utricle as defined by genetic labeling.

Because confounding variables, such as cell cycle and stress, may impair successful reconstruction of the trajectory, we applied an unsupervised filter strategy. First, genes were filtered similarly to the original study (Burns et al., 2015). We removed 917 genes detected in fewer than three cells and 2,096 genes that varied little from cell to cell, i.e., they had a coefficient of variation (standard deviation / mean,  $\sigma/\mu$ )  $\leq 0.5$ . We then identified the most variable genes remaining in the set using an unsupervised strategy that controls for the relationship between a gene's average expression intensity and its expression variability (Macosko et al., 2015). Genes were placed into 20 bins based on their mean expression. For each bin the index of dispersion ( $\sigma^2/\mu$ ) distribution was computed and standardized (Z-score =  $x/\sigma - \mu/\sigma$ ). Using a Z-score threshold of 1.7 (Macosko et al., 2015), we identified 436 highly variable genes whose expression pattern was assumed to trace the underlying spatiotemporal differences of the 120 individual P1 mouse utricle cells. This dataset was predicted to have an intrinsic dimensionality of size six using the top 100 eigenvalues obtained by spectral embedding. When determining states, we accounted for the small sample size of this dataset and increased the statistical power of the clustering post hoc analysis by requiring that siblings in the cluster dendrogram were merged if they had less than two differentially expressed genes with  $p < 10^{-3}$ . Subsequent trajectory fitting was performed as described above (see above: *The CellTrails Framework*).

#### **Single-cell qRT-PCR Data from Blood Cells**

We obtained publicly available expression profiles of 620 single primary blood stem and progenitor cells isolated from mouse bone marrow (Moignard et al., 2013). The single cell profiles of the FACS-purified cells in this dataset are labeled by cell type. Non-detects were set to the technical limit of detection,  $C_T = 28$ . Cells were filtered and normalized using the reference genes *Ubc* and *Polr2a*. 28 dying cells or multiplets indicated by significant lower ( $< 25\%$  quantile  $- 1.5 \times$  interquartile range) or higher ( $> 75\%$  quantile  $+ 1.5 \times$  interquartile range) reference gene levels were removed. The overall  $C_T$  value distributions of *Ubc* and *Polr2a* were computed without non-detects.  $C_T$  values were transformed to Log2Ex and normalized by the geometric mean of *Ubc* and *Polr2a* as described above (see above: *Single-cell qRT-PCR Data from Chicken Utricles*). This resulted in an expression matrix  $\mathbf{X} = (x_{ij}) \in \mathbb{R}^{m \times n}$  with  $m = 592$  cells and  $n = 18$  key hematopoietic transcription factors. To account for the low number of features, we used the top 25 eigenvalues from the spectral embedding to determine four relevant latent dimensions and required for the state identification that at least two genes were differentially expressed ( $p < 10^{-4}$ ) between each sibling in the clustering dendrogram. The subsequent trajectory fitting was performed as described above (see above: *The CellTrails Framework*).

#### **Single-cell qRT-PCR Data from Embryogenesis**

Processed expression profiles of 48 genes measured in 429 single cells from zygote to blastocyst developmental stages (Guo et al., 2010) and the respective cell type annotations were obtained from Buettner and Theis (2012). Non-detects were set to the technical limit of detection,  $C_T = 28$ . Log2Ex values were then derived by  $28 - C_T$ . We identified an intrinsic dimensionality of nine using the top 100 eigenvalues of the spectral embedding. State identification was conducted in the latent space as described above (see above: *The CellTrails Framework*). Since the cells exhibited a strong separation by stage in the latent space, no interfaces between states were found using the 10-nearest neighbors. Therefore, we increased the  $k$ -neighborhood ( $k = 50$ ) for the maximum interface tree construction. Subsequent trajectory fitting was performed as described above (see above: *The CellTrails Framework*).

### **Application of Alternative Algorithms**

#### **Dimensionality Reduction**

Linear dimensionality reduction was performed using principal component analysis on the gene-wise scaled expression matrix having unit variance. Principal components were derived by an orthogonal transformation of the expression matrix by means of the spectral decomposition of its gene-gene covariance matrix.

Diffusion maps were computed using the implementation available in the R package *destiny*, which allows the autonomous determination of the neighborhood size and the diffusion scale parameter of the Gaussian kernel.

Learned lower-dimensional manifolds were approximated and visualized using the Barnes-Hut implementation of t-Distributed Stochastic Neighbor Embedding as provided by the R package *Rtsne*.

#### **Trajectory Reconstruction**

The normalized expression matrix  $\mathbf{X} = (x_{ij}) \in \mathbb{R}^{m \times n}$  was input to trajectory reconstruction algorithms that were freely available, functional, and comparable to CellTrails. Here, we selected methods employing diverse nonlinear dimensionality reduction techniques prior to trajectory inference. For all algorithms, we used recommended (standard) parameter settings. The diffusion pseudotime algorithm (DPT) with option 'branching' and the SLICER algorithm were applied using the R packages *dpt* and *SLICER*, respectively; SCUBA was applied using the MATLAB package *SCUBA*. All implementations predicted a trajectory structure and derived a



pseudotime per cell, but did not infer expression dynamics. Therefore, we adopted the moving average (over 50 adjacent cells) approach originally presented in the DPT article (Haghverdi et al., 2016) by using the R package *zoo*. Monocle was applied using the R package *monocle* with its most recent “DDRTree” option. For each algorithm, the start and end of the inferred trajectory was determined using the expression of *TECTA* and *MYO7A* (Figures S6A–S6D). All algorithms, except Monocle, extracted single trails automatically.

### Edu Injections

For 5-ethynyl-2'-deoxyuridine (EdU) injection *in ovo*, chicken eggs were incubated for 15 days. A single subcutaneous EdU injection (50 mg/kg) in sterile, phosphate buffered saline, (PBS, pH 7.4) was administered to each embryo. The embryos were further incubated for 5 days and euthanized via decapitation. For EdU injection at posthatch day 7, chickens were housed for 7 days and received a single subcutaneous EdU injection (50 mg/kg), as described above. Chickens were euthanized 10 days after EdU injection. Detection of EdU incorporated in the DNA was achieved using the Click-iT EdU Alexa Fluor Imaging Kit.

### In situ Hybridization

Complementary DNA fragments for mRNA encoding *CALB2*, *LOXHD1*, *POU4F3*, *SKOR2*, *SYN3*, and *TMC2* were PCR-amplified from chicken basilar papilla cDNA and cloned into pSPT18 or pSPT19 (see Table S1D for details). The resulting plasmids were linearized, and antisense digoxigenin-11-UTP (DIG)-labeled single-stranded RNA probes were run-off transcribed with T7 RNA-polymerase (SP6/T7 Transcription Kit), precipitated, and suspended in 30  $\mu$ L water.

*In situ* hybridization was conducted on 16- $\mu$ m thick frozen utricle sections along the organ's coronal axis. DIG-labeled RNA was diluted 1:100 in 120  $\mu$ L hybridization buffer consisting of 50% formamide, 10% dextran sulfate, 1 mg/mL yeast RNA, 1x Denhardt's solution, 185 mM NaCl, 5.6 mM NaH<sub>2</sub>PO<sub>4</sub>, 5 mM Na<sub>2</sub>HPO<sub>4</sub>, 5 mM EDTA, and 15 mM Tris, pH 7.5. The DIG-cDNA in hybridization buffer was heated to 75°C and transferred onto the utricle sections, protected with coverslips, and incubated overnight at 70°C in a chamber humidified with 50% formamide in 1x saline-sodium citrate (SSC) buffer, which consists of 150 mM NaCl and 15 mM trisodium citrate, pH 7.0. The microslides were incubated with 5x SSC at 70°C until coverslips fell off, transferred into pre-heated (70°C) wash buffer consisting of 50% formamide, 0.1% Tween-20 in 1x SSC. The wash buffer was replaced once after 30 min, followed by two 15-minutes washes at room temperature in 0.2x SSC, and transfer of the slides into PBS.

The sections were then blocked for 2 hr in PBS containing 0.5% blocking reagent, 5% heat-inactivated goat serum, and 0.1% Tween-20, followed by overnight incubation at room temperature in blocking solution with 1,500-fold diluted alkaline phosphatase-conjugated anti-DIG Fab fragments. After two 30-minutes washes with 0.1% Tween-20 in PBS, and two 15-minutes washes with PBS, the sections were incubated for 15 min in basic buffer consisting of 0.1% Tween-20 in 100 mM NaCl, 50 mM MgCl<sub>2</sub>, and 100 mM Tris at pH 9.5. Alkaline phosphatase activity was detected with nitroblue tetrazolium chloride at 30  $\mu$ g/mL and 5-bromo-4-chloro-3-indolyl phosphate substrate at 60  $\mu$ g/mL alkaline buffer overnight at room temperature. The slides were sealed with coverslips to minimize background oxidative processes.

### Immunocytochemistry

For *CALB2* protein intensity and stereocilia length measurements, utricles were dissected and processed as previously described (Krey et al., 2016). For ATP2B2 immunolabeling we observed that the protease XXIV treatment described by Krey and colleagues resulted in a lack of signal. Thus, we performed ATP2B2, MYO3A and MYO7A protein intensity and stereocilia length measurements without protease XXIV treatment. For all ATP2B2, MYO3A, MYO7A, FSCN2, NF200, TNNC2, and TECTB whole-mount antibody labeling experiments, as well as EdU detection, the otolithic membranes were removed using an eyelash and a gentle fluid stream generated with a 1 mL syringe and attached 30G 1/2 hypodermic needle. The utricles were fixed overnight with 4% paraformaldehyde in PBS, rinsed three times for 15 min in PBS, perforated for 30 min with 1% Triton X-100 in PBS, and blocked for 3-4 h with 1% BSA, 5% donkey serum, 0.1% Triton X-100 in PBS. Utricles were incubated overnight at 4°C in blocking solution with primary antibodies and Alexa Fluor 488-conjugated phalloidin. The specimens were then washed three times for 15 min at room temperature with 0.2% Triton X-100 in PBS, incubated for 1-2 h in blocking solution with secondary antibodies, rinsed three times for 15 min in 0.2% Triton X-100 in PBS and three times for 15 min in PBS. FluorSave Reagent (Calbiochem) was used to mount 2-3 utricles on glass slides using a Secure-Seal Spacer (one well, 13 mm diameter, 0.12 mm deep, Invitrogen).

### Microscopy and Image Analysis

*In situ* hybridization images were acquired with an AxioCam HRc and AxioVision software on a Zeiss Axio Imager M1 equipped with EC PLAN-Neofluar objectives 10x/0.30 numerical aperture (NA) and 20x/0.5 NA. Whole utricles were imaged with a Zeiss LSM 880 Airyscan laser scanning confocal microscope and Zen Black software. A Plan-Apochromat 40x/1.3 NA oil objective was used for confocal imaging at 2.2x zoom and 0.40  $\mu$ m z-step interval; Airyscan imaging was done at 1.8x zoom and 0.22  $\mu$ m z-step interval settings. Airyscan imaging was used for *CALB2* and *MYO3A* protein intensity and stereocilia length measurements. For each individual utricle, identical microscope settings (laser intensity and gain) were used for z stacks of striolar and extrastriolar regions. For analysis, the z stacks were loaded into Bitplane Imaris 8.4.1 followed by 3D reconstruction, and measurements of protein

intensities and bundle lengths. 3D projections for individual z stacks were visualized using the ‘Surpass’ tool. For further analysis, we segmented each z stack ( $x = 100 \mu\text{m}$ ,  $y = 100 \mu\text{m}$ ) into five cropped 3D projections with  $x = 100 \mu\text{m}$  and  $y = 20 \mu\text{m}$  using the ‘Crop3D’ tool. To enable a side view of hair cells with upright hair bundles, the ‘Surpass’ tool was used to rotate each segment. Protein intensity measurements were conducted with the ‘Spot’ function to automatically detect and locate intensity spots above background per channel. Parameters were chosen based on pixel intensity threshold, target size, and location (bundle, soma, nucleus) to extract intensity data points. F-ACTIN and ATP2B2 intensity spot detection was restricted to hair bundles; for MYO7A and CALB2, the apical region of hair cells was used; MYO3A was measured only at the tips of the tallest stereocilia. To obtain bundle lengths, we measured the longest stereocilium of each bundle by manually selecting points along the stereocilium with the ‘Measurement Points’ tool. The spot intensity center values of the target protein and F-ACTIN, as well as the length measurement for each hair cell were exported for subsequent statistical analysis. All immunolabeling experiments were carried out at least three times.

### Scanning Electron Microscopy (SEM)

To prepare E15 and E20 chicken utricles for SEM, embryos were decapitated, the brain was removed, and the head bisected in cold chicken saline (155 mM NaCl, 5 mM KCl, 5 mM D-glucose, and 10 mM HEPES pH 7.25) containing 4% formaldehyde (Ted Pella). The temporal bone was opened to expose utricles to fixative. Samples were maintained in the formaldehyde overnight at 4°C. A thorough wash with chicken saline removed the fixative before utricles were dissected from the temporal bone. The sensory epithelium was exposed and following a 20-minute incubation with 50  $\mu\text{g}/\text{mL}$  protease XXIV (Sigma-Aldrich) in room-temperature chicken saline and a rinse in ice-cold chick saline, otoconia and otolithic membranes were detached with an eyelash. Utricles were incubated overnight at 4°C in 2.5% glutaraldehyde (Ted Pella) and 0.1 M sodium cacodylate, pH 7.4 (Electron Microscopy Sciences). Utricles were further processed for SEM using the osmium-thiocarbohydrazide method (Hunter-Duvar, 1978) with slight modifications: utricles were incubated in 1% osmium tetroxide (Polysciences) for 45 min, and 20 min in fresh, filtered 1% thiocarbohydrazide (Sigma-Aldrich), with thorough washes in water in between each step. This sequence was repeated three times. Tissues were dehydrated with an ethanol series. E20 utricles were critical point dried using liquid  $\text{CO}_2$  in an EMS 850 critical point dryer (Electron Microscopy Sciences). For imaging, E20 utricles were glued onto aluminum specimen mounts (Electron Microscopy Sciences) with colloidal silver liquid (Electron Microscopy Sciences), and imaged using a FEI Sirion XL30 FEG field-emission scanning electron microscope operated at 5 kV. E15 utricles were critical point dried in liquid  $\text{CO}_2$  in a Leica CPD300. For imaging, E15 utricles were also glued onto aluminum specimen mounts with colloidal silver liquid, and imaged using an FEI Helios Nanolab 660 DualBeam Microscope operated at 1 kV (FEI). High-resolution images were acquired over large areas of E15 utricles using the MAPS Software (FEI), and stitched together with a 5% overlap.

### Analysis of Bundle Length Measurements

To identify extrastricular hair cell type II bundle growth stages, we fitted a Gaussian mixture model with three components based on the bundle length distribution of 642 measurements from extrastricular regions located equidistant from the striola along the central region of the MES. Mean, standard deviation, and prior of each component were derived by expectation-maximization using the R package *mixtools*.

To analyze protein expression as a function of bundle length, we fitted generalized additive models with a single smoothing term (thin-plate regression spline) with four basis dimensions.

To map pseudotime to bundle length, we aligned CALB2 expression as a function of pseudotime along TrES with CALB2 protein levels as a function of bundle length from the medial extrastricola using the fitted generalized additive models ( $\zeta_{\text{CALB2}}$  and  $\zeta_{\text{CALB2}}$ ). We observed that transcript and protein dynamics exhibit very similar patterns during bundle maturation. Further, CALB2 could be reliably quantified in the cytoplasm, neglecting the requirement to consider the transport of the protein to the hair bundle in our alignment. To account for nonlinearity between transcription, translation, and degradation rates, we used asymmetric dynamic programming to generate a semi-unconstrained alignment between the reference vector  $\zeta_{\text{CALB2}}/\max(\zeta_{\text{CALB2}})$  and the query vector  $\zeta_{\text{CALB2}}/\max(\zeta_{\text{CALB2}})$  using the R package *dtw*. The resulting warp was used to translate pseudotime to bundle length (and vice versa).

To compare gene expression dynamics of TrES, TrES\* and TrS as a function of bundle length at the same time, we aligned each query to the common reference TrES using dynamic time warping (see above: *Differential Trail Analysis*) and translated pseudotime to bundle length, respectively.

### QUANTIFICATION AND STATISTICAL ANALYSIS

*P*-values were calculated and corrected for multiple testing as indicated in the main text. To analyze how metadata (cell origin and cellular FM1-43 dye uptake) is distributed in cell clusters (Figure 1G), we compensated for missing label information by imputation using 1-nearest neighbor classification in the lower-dimensional space.

## DATA AND SOFTWARE AVAILABILITY

### Data

Processed single-cell qRT-PCR expression data (normalized Log2Ex values) from E15 chicken utricles are reported in [Table S1](#) and are available with the CellTrails software. A high-resolution version of the SEM data file shown in [Figure 1B](#) is available at Mendeley Data (<https://data.mendeley.com/datasets/yy3c72972w/1>).

### Software

The implementation of the CellTrails algorithm (R package) including its documentation (vignette) is available at <http://hellerlab.stanford.edu/celltrails/>



**Cell Reports, Volume 23**

**Supplemental Information**

**Transcriptional Dynamics of Hair-Bundle**

**Morphogenesis Revealed with CellTrails**

**Daniel C. Ellwanger, Mirko Scheibinger, Rachel A. Dumont, Peter G. Barr-Gillespie, and Stefan Heller**

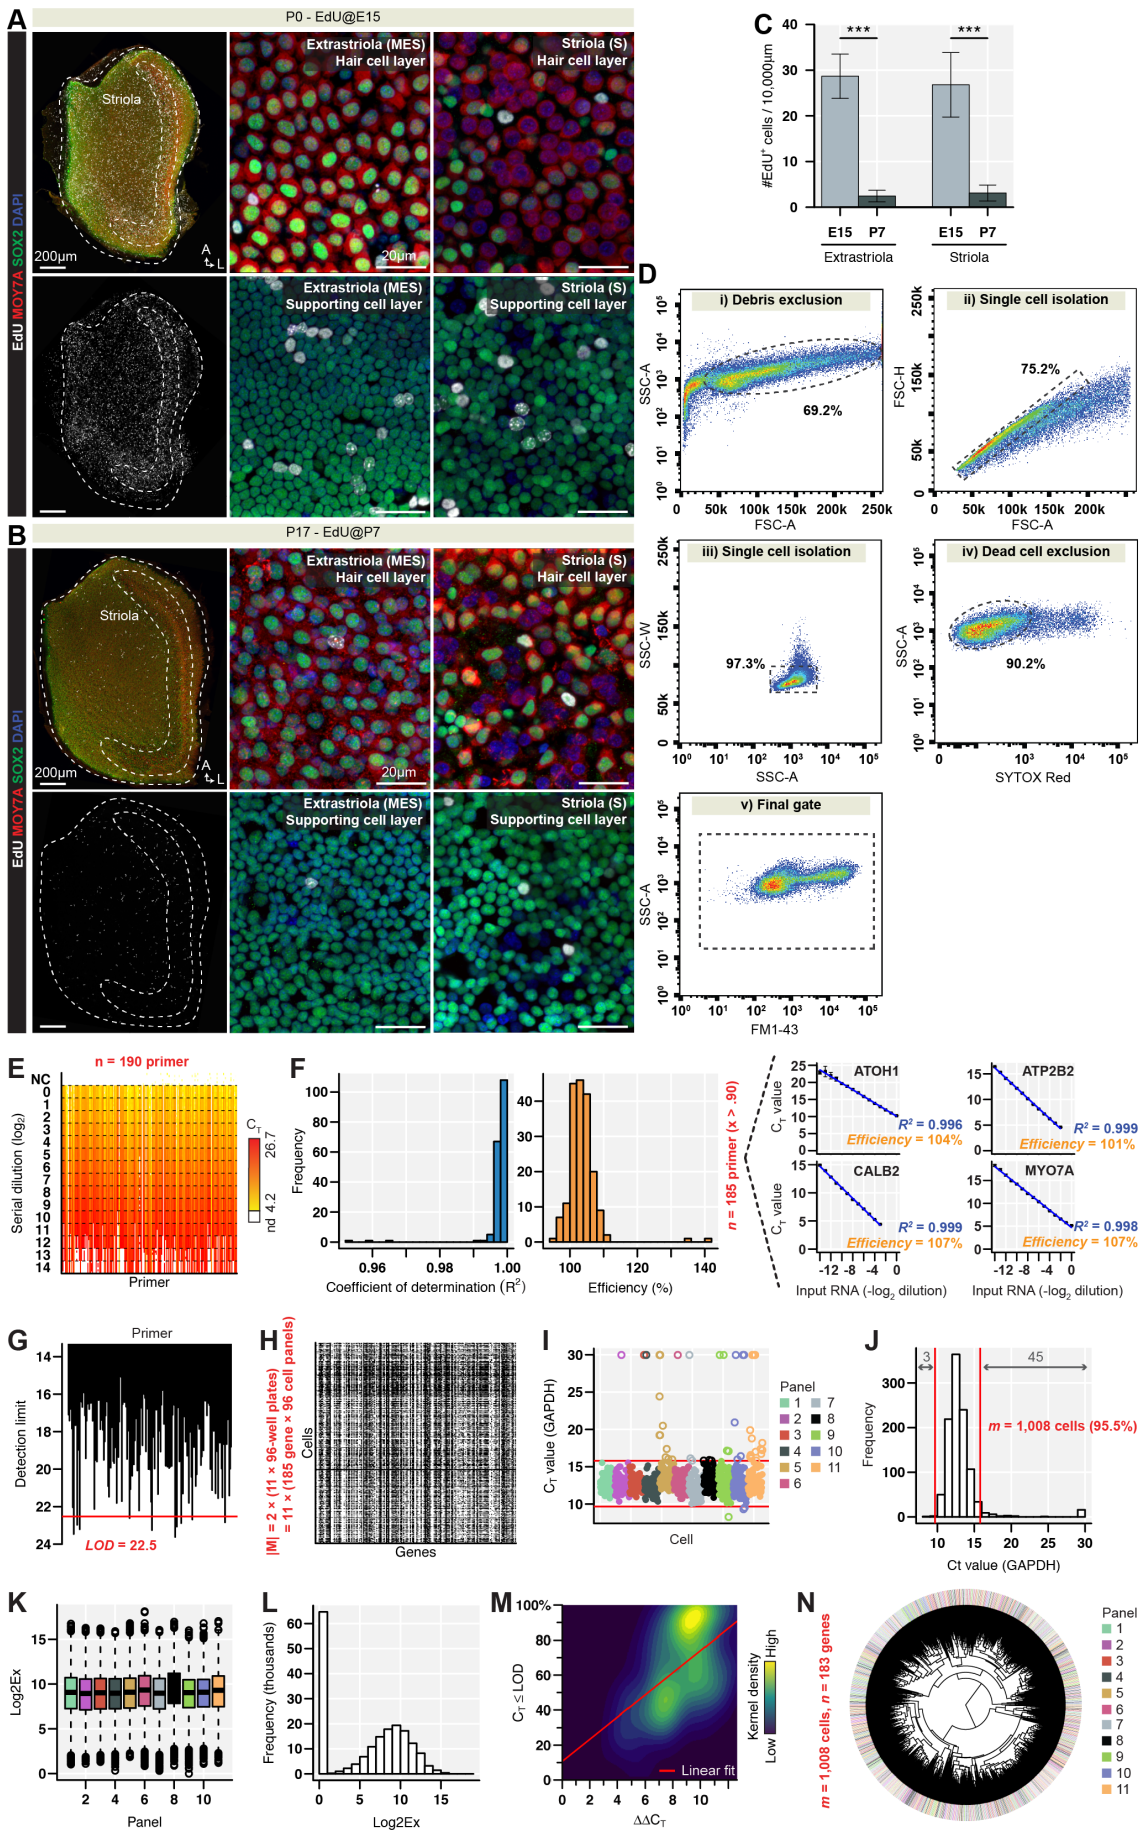

## Figure S1. Specimen Analysis and Raw Data Processing. Related to Figure 1

(A-C) Utricle cell proliferation. 5-ethynyl-2'-deoxyuridine (EdU) was injected at E15 and utricles were examined at P7 (A), and EdU was injected at P7 and examined at P17 (B). (A, B) Immunolabeling with antibodies to hair cell marker MYO7A and supporting cell marker SOX2; nuclear DNA is labeled with 4,6-diamidino-2-phenylindole (DAPI). (C) Quantification of EdU<sup>+</sup> cells (per 100x100  $\mu\text{m}^2$  area) in extrastriolar and striolar regions of E15 and P7 chicken utricles. Error bars show the 95% confidence interval of the mean; \*\*\* Mann-Whitney test  $P < 10^{-3}$ .

(D) Illustration of the FACS gating strategy to filter viable single-cell events. Debris, dead cells, and cell aggregates were sequentially excluded (i-v). Indicated are gates and the percentages of filtered cells that propagated for each subsequent step from a representative experiment; SSC-A = side scatter area, SSC-W = side scatter width, FSC-A = forward scatter area, FSC-H = forward scatter height, and Sytox red, a dye excluded from living cells.

(E, F) Primer validation.  $C_T$  values for each primer pair were recorded for a serial two-fold 15-step dilution series of bulk RNA (NC = negative control). 185 suitable primer pairs had a linear relation between the generated  $C_T$  value and the log input RNA concentration ( $R^2 > 0.9$  and efficiency  $> 0.9$ ), such as illustrated with the examples of *ATO1*, *CALB2*, *ATP2B2*, and *MYO7A*; error bars denote  $\pm$  standard deviation of six replicates.

(G) Determination of the global limit of detection (LOD). The LOD was set to the 95% quantile of individual detection limits of the assayed primer pairs as identified by the dilution series.

(H) Missingness map. Shown is the pattern of non-detects (white points) of 195,360 measurements. The assay (185 primer pairs) was conducted on 11 panels, which are composed of two matching 96-well plates quantifying identical cells; black points indicate genes for which expression values were determined.

(I, J) Filtering of 1,008 cells based on the reference gene *GAPDH*. Red lines denote the inner and outer fence for 48 outliers (first and third quartile  $\pm 1.5 \times$  interquartile range).

(K, L) Distribution of Log<sub>2</sub>Ex transformed and normalized  $C_T$  values. Boxplots show similar Log<sub>2</sub>Ex value distributions (without non-detects) for each single panel. Histogram indicates a high frequency of non-detects in the data set.

(M) Relation between the probability of a primer producing non-detects and the mean normalized expression intensity (without non-detects) of the corresponding gene. Genes producing a higher number of transcripts have a lower probability for drop-outs.

(N) Hierarchical clustering of single cells colored by individual panels suggests no significant batch effects.

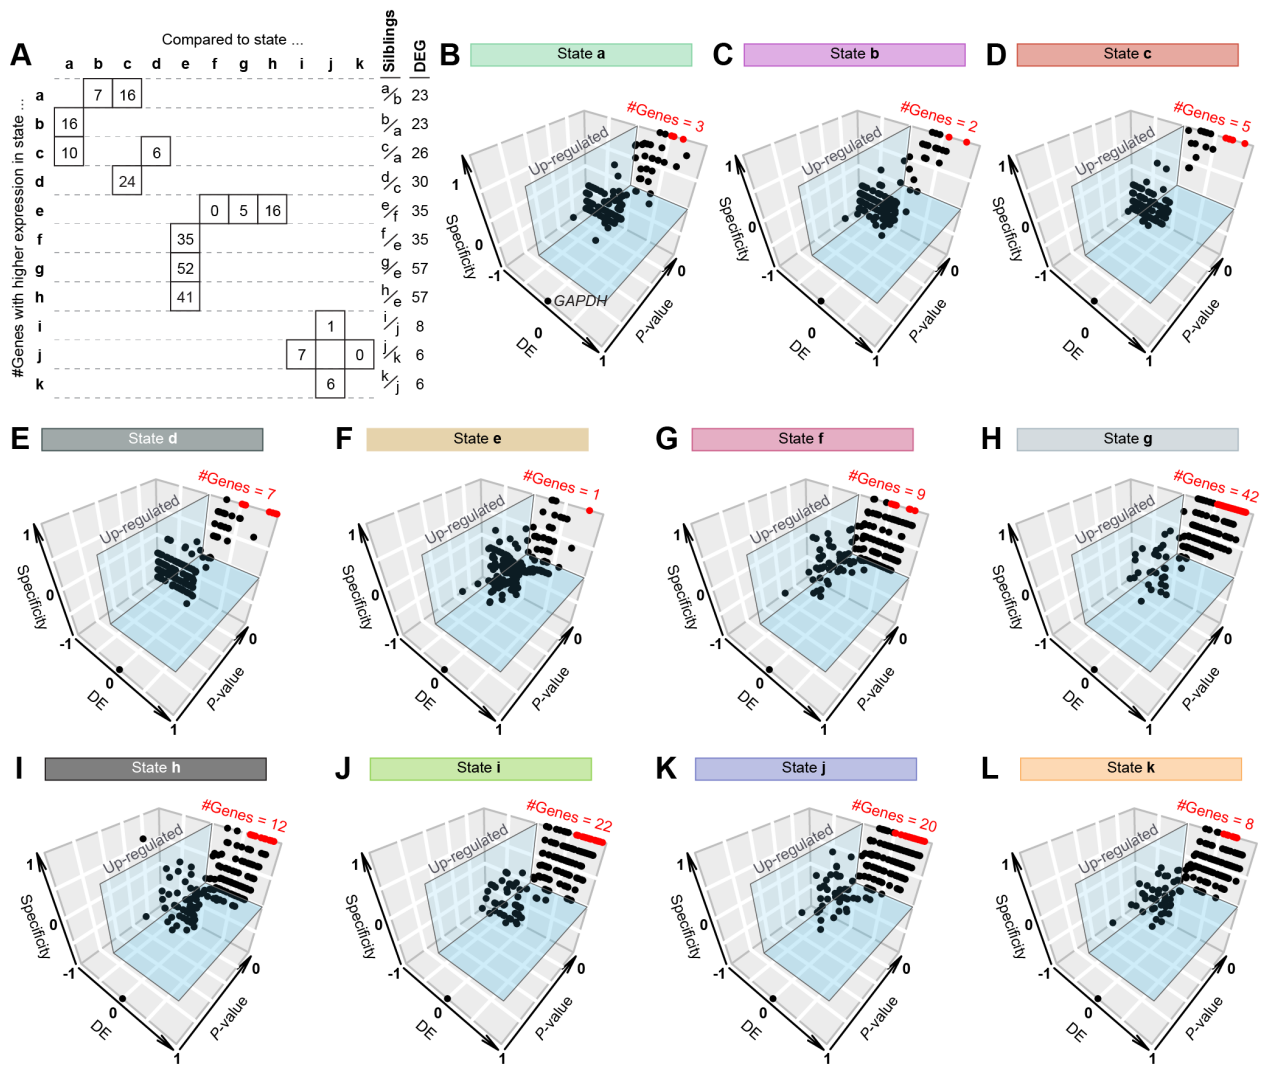

**Figure S2. Gene Marker Detection. Related to Figure 1**

(A) Post hoc analysis. The table represents the last iteration of the post hoc analysis generating the final set of states. It lists the number of genes significantly higher expressed in one state (row) compared to its neighbors (siblings) in the cluster dendrogram (column). For example, the closest neighbor to state *a* is state *b* in the cluster dendrogram. We found 23 differentially expressed genes (DEG) between both states, whereas state *a* has 7 genes significantly higher expressed compared to state *b*, and state *b* has 16 higher expressed genes than state *a*. As a consequence, states *a* and *b* were not joined and determined as distinct states.

(B-L) Multiple differential gene expression analysis. One state was compared to all other states simultaneously. Shown are the differential expression score (DE), specificity and Monte Carlo *p* of each gene for each state. Up-regulated genes are defined by  $DE > 0.5$  and  $specificity > 0$ ; specific state markers (red dots) have further specificity of 1 and  $p < 10^{-3}$ . As *GAPDH* was used for normalization, it has, as expected,  $DE = 0$ ,  $specificity = -1$  and  $P = 1$  in all states.



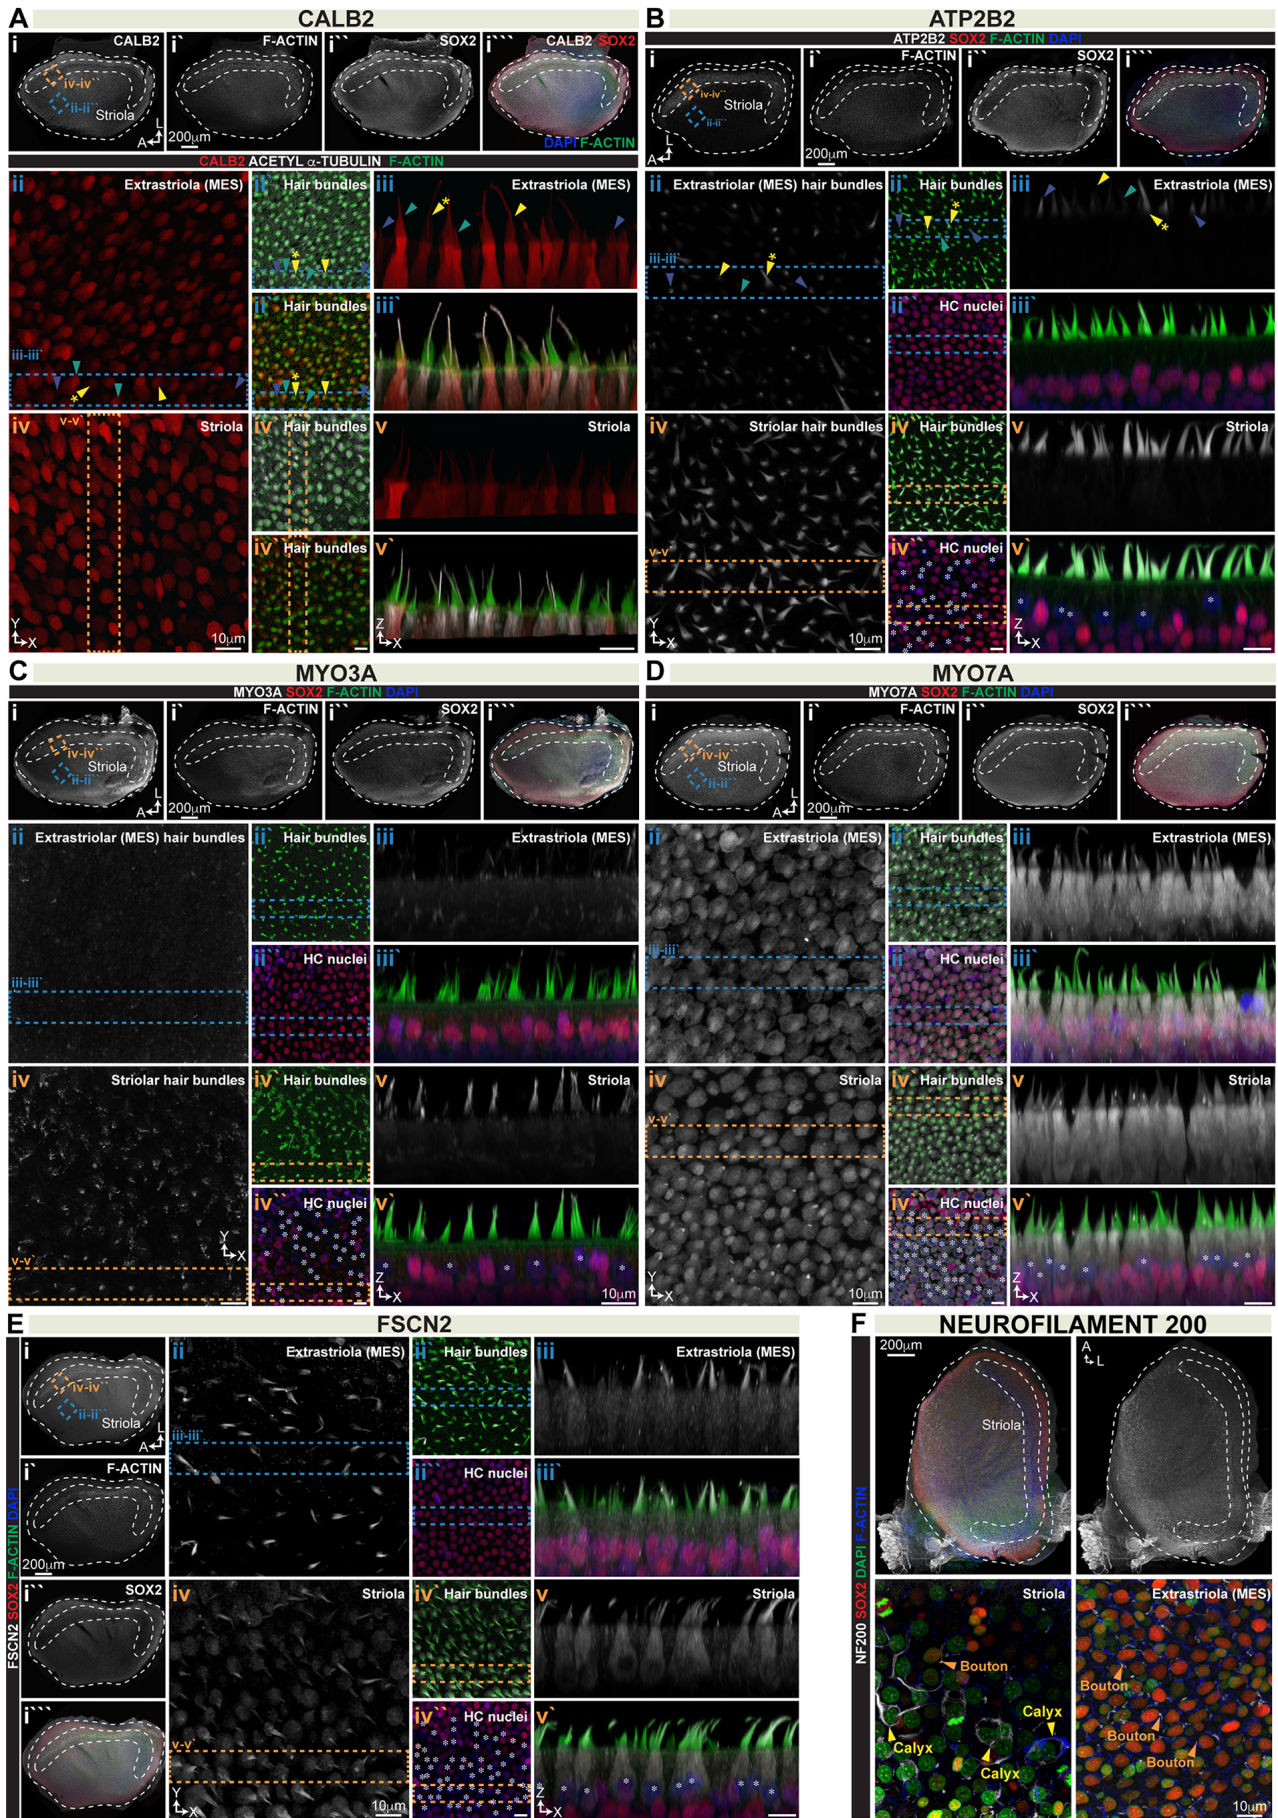

**Figure S3. Overview of Single-cell Protein Measurements. Related to Figures 4-6**

(A-E) Immunolabeling of chicken E15 utricles. Nuclei were labeled with DAPI, stereocilia were visualized with phalloidin (F-ACTIN), kinocilia were labeled with antibodies to acetylated  $\alpha$ -tubulin (ACETYL- $\alpha$ -TUBULIN), and supporting cells and type II hair cells were labeled with antibodies to SOX2. Images at different focal planes were recorded from the striola and medial extrastriolar regions as indicated (i-i'''). Entire volumes were rendered (z-stacks), which enabled the analysis of x-y projections (ii-ii'', iv-iv'') and x-z projections (iii-iii', v-v'); asterisks highlight nuclei of SOX2<sup>-</sup> maturing/mature type I hair cells. FSCN2 protein expression was not quantified. The arrowheads in A and B point to the same hair bundles that are labeled in Figure 4E and I.

(F) E15 utricles were immunolabeled with antibodies to the neural marker Neurofilament 200 kDa (NF200) and with antibodies to SOX2. DAPI was used to visualize nuclei. The E15 striolar epithelium harbors mature type I hair cells with calyx type terminals. Medial extrastriolar regions and the striola harbor mature type II hair cells, which are innervated by boutons.

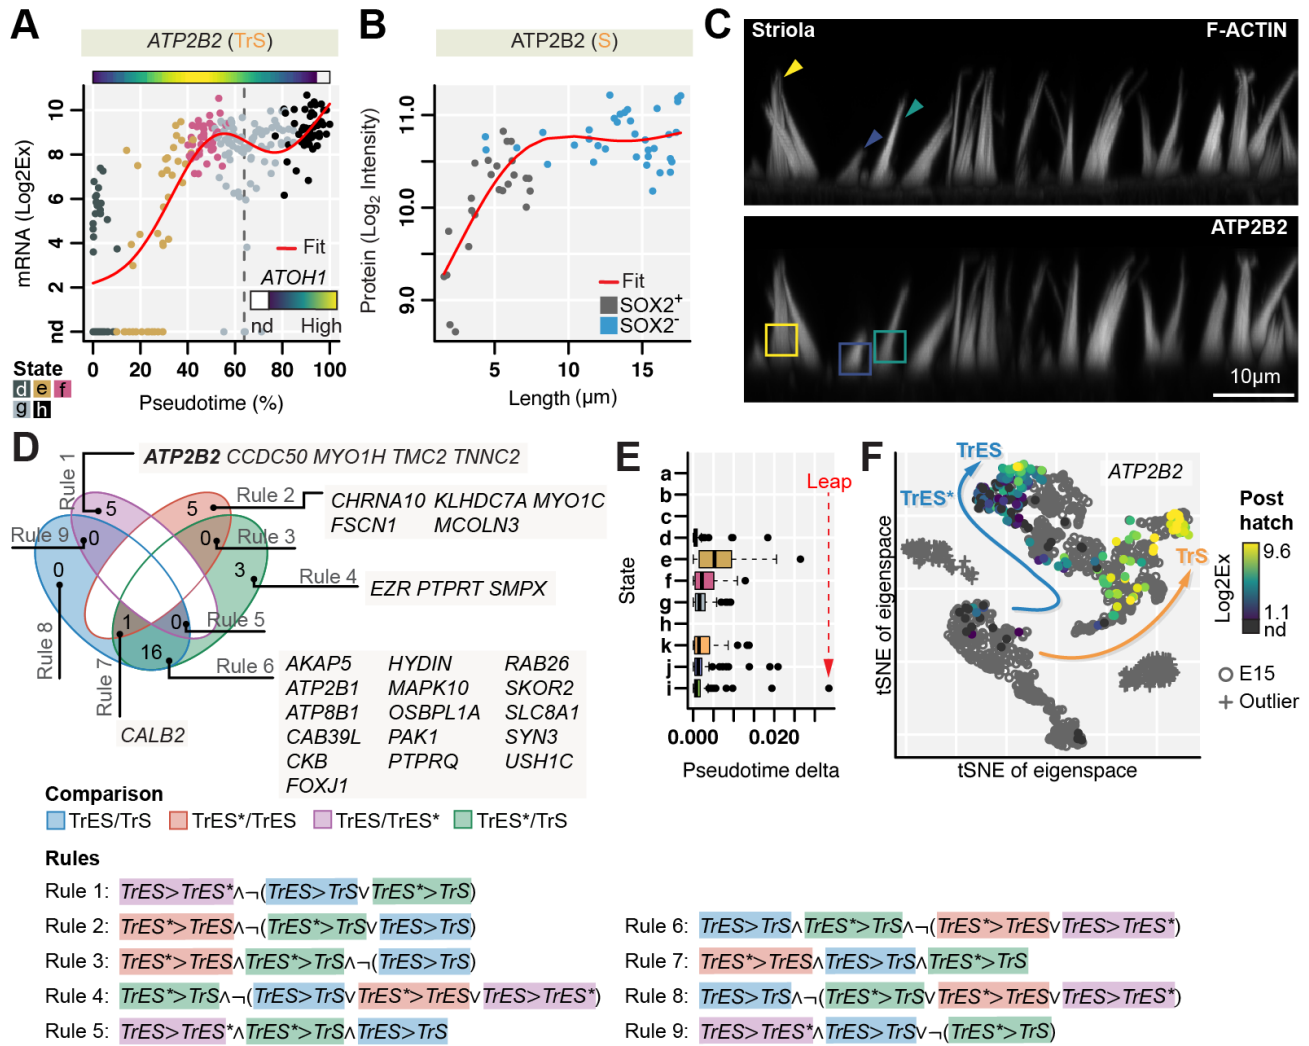

**Figure S4. Striolar ATP2B2 Expression and Inter-Type II Hair Cell Comparison. Related to Figure 4**

(A) *ATP2B2* expression of TrS. Cells are colored by cluster (*d-h*), the fitted expression dynamic is shown in red; upper panel shows the corresponding *ATOH1* expression.

(B) *ATP2B2* expression in the striola of E15 utricles. Quantification of *ATP2B2* protein intensity along with bundle length measurements confirms up-regulation in developing type I hair cells ( $n = 61$ ); lack of *SOX2* expression confirms type I hair cell identity.

(C) *ATP2B2* expression in short (blue), medium (green), and long (yellow) hair bundles.

(D) Venn diagram of gene sets with increased expression at the mature extrastricular states. For example, *ATP2B2* is significantly higher expressed (Log2Ex fold-change > 2.5, Peto-Peto test  $P < 10^{-3}$ ) at the terminal end state of TrES than TrES\*, but not compared to TrS.

(E) Distributions of pseudotemporal cell distances in TrES. Shown are the boxplots of absolute differences between adjacent cells (pseudotime delta) within each state. The red arrow indicates a reasonable gap (strong outlier) along TrES in cluster *i*, indicating that this mature hair cell cluster may contain two sub-clusters. Whiskers extend to 1.5 times the interquartile range.

(F) Spectral embedding of embryonic and posthatch cells. The manifold was predicted to unfold in an 11-dimensional latent space (eigenspace). To visualize a two-dimensional approximation of the manifold, t-distributed stochastic

neighbor embedding (tSNE) was used. The branching trajectory structure is similar to E15 (TrS, TrES). Posthatch hair cells, shown as points colorized by *ATP2B2* expression intensity, aggregate at the terminal ends of the trajectory. Embryonic cells are shown as grey circles. Mature extrastriolar cells with higher and lower *ATP2B2* levels (TrES\*) can be observed. Cells that were found unrelated to the trajectory (isolated clusters) are indicated by grey crosses; E15 outliers correspond to state *c*, posthatch outliers were found to be compromised hair cells based on distinct and significant upregulation (6.2-fold, Wilcoxon rank sum test  $P < 5 \times 10^{-38}$ ) of *SH3GLB2* encoding endophilin 2, a protein that promotes mitophagy (Wang et al., 2016).



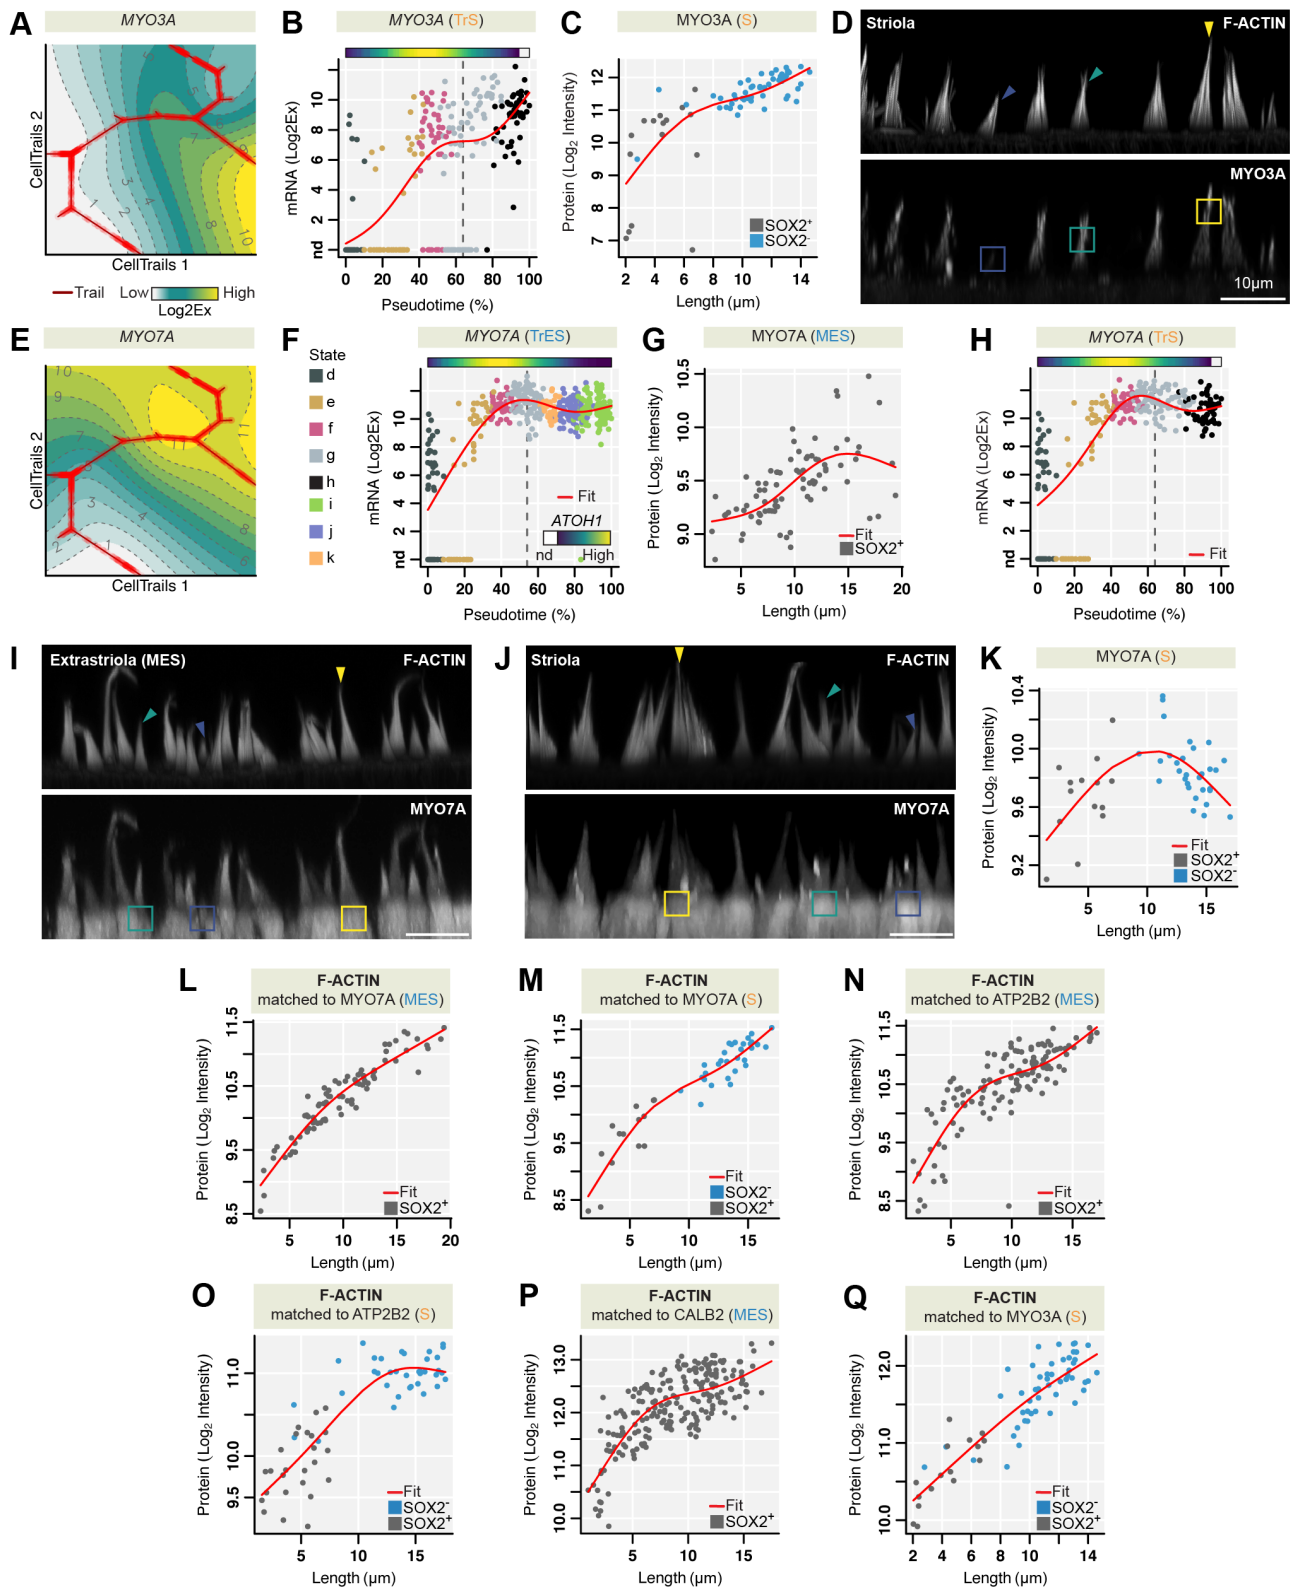

**Figure S5. Transcript and Protein Expression of *MYO3A* and *MYO7A*. Related to Figure 6**

(A-K) CellTrails maps and expression profiles of *MYO3A* and *MYO7A*. Immunolabeling qualitatively and quantitatively validated the inferred dynamics in hair cells from medial extrastricular regions and hair cells from the striola ( $n = 66$  *MYO3A*,  $n_{MES} = 83$  *MYO7A*,  $n_{striola} = 44$  *MYO7A* measurements). Young hair cells with short bundles, irrespective of

future type, exhibit strong immunoreactivity for SOX2, which becomes downregulated in maturing type I hair cells (C, K). Arrows in immunolabeling images (D, I, J) indicate different bundle lengths (blue = short, green = medium, yellow = long).

(L-Q) For each single-cell target protein quantification (ATP2B2, CALB2, MYO7A, MYO3A), the corresponding F-ACTIN staining intensity was measured. The high positive correlation between bundle lengths and F-ACTIN levels indicates that unbiased and representative samples were obtained.

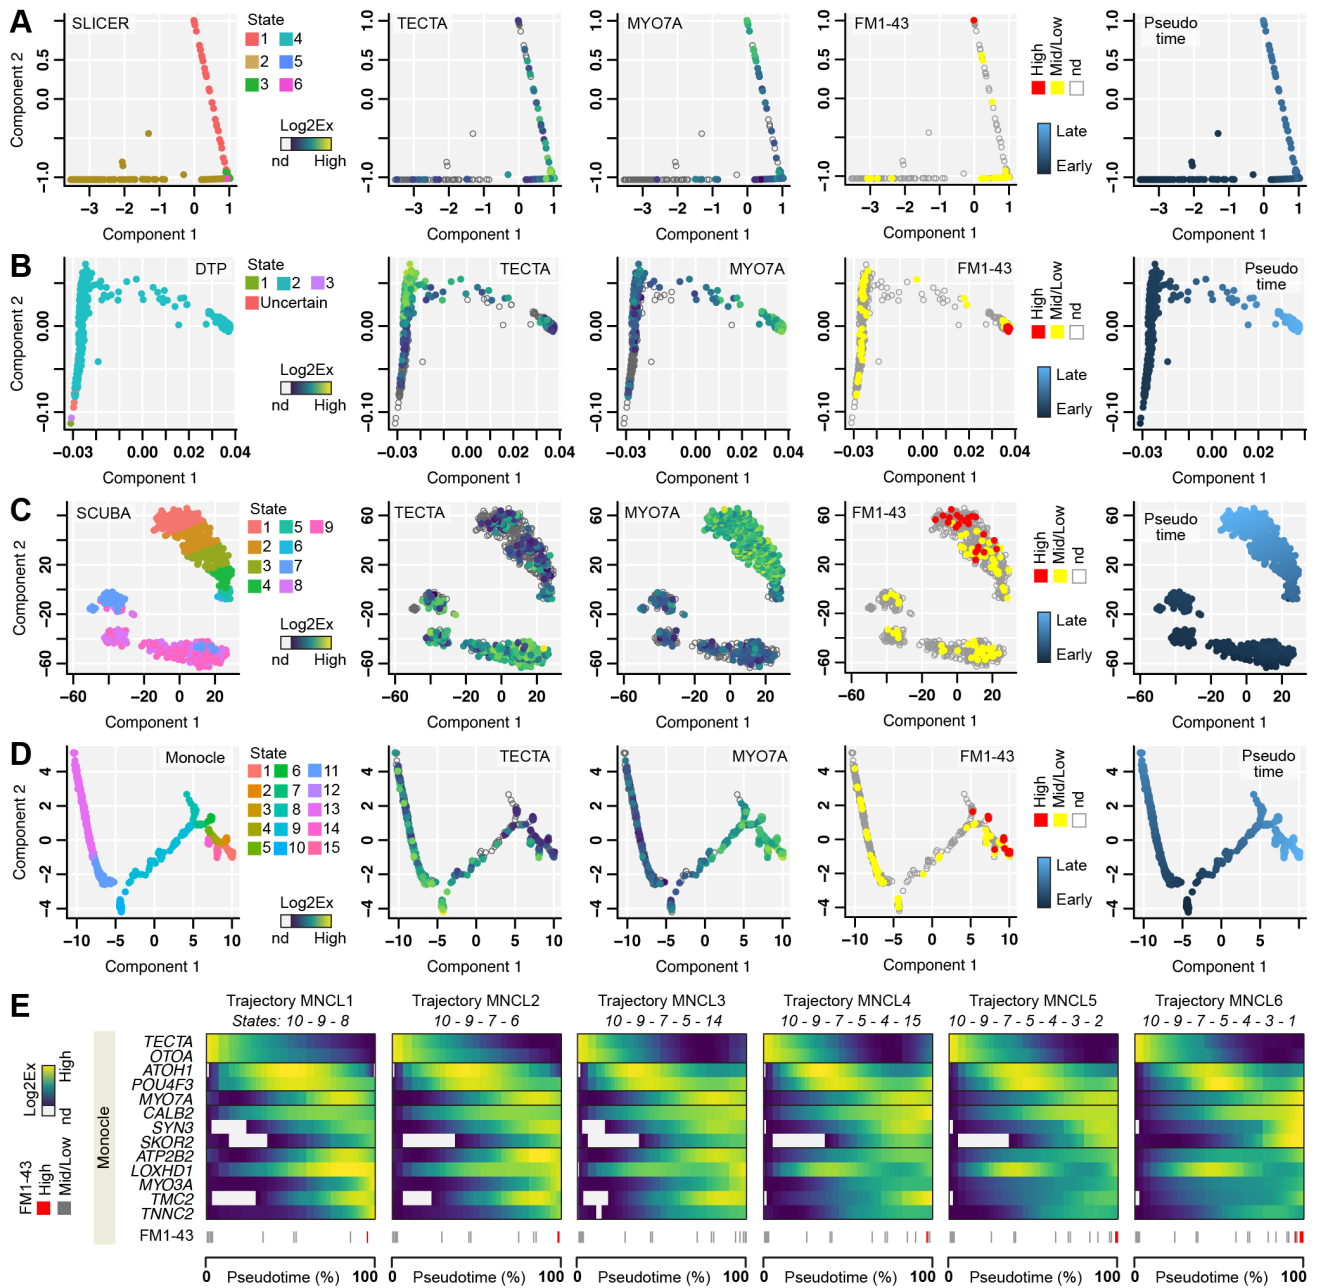

**Figure S6. Use of Alternative Algorithms. Related to Figure 6**

(A-D) Lower-dimensional representation of 1,008 cells computed by SLICER, DPT, SCUBA, and Monocle (version 2 with DDRTree). Shown are the states assigned by each algorithm, expression of the supporting cell marker *TECTA* and hair cell marker *MYO7A* (used to determine the directionality of the trajectory), FM1-43 dye labeling, and inferred pseudotime. All algorithms correctly order mature cells (FM1-43 high) at the terminal end or ends.

(E) Monocle predicts six differentiation endpoints, resulting in six different trails (sequence of states is concordant to (D)). The heatmaps show the expression dynamics of genes that are fully validated markers of striolar and extrastriolar hair cell development and were selected according to Figure 6A; heatmaps are scaled per gene and across trails.

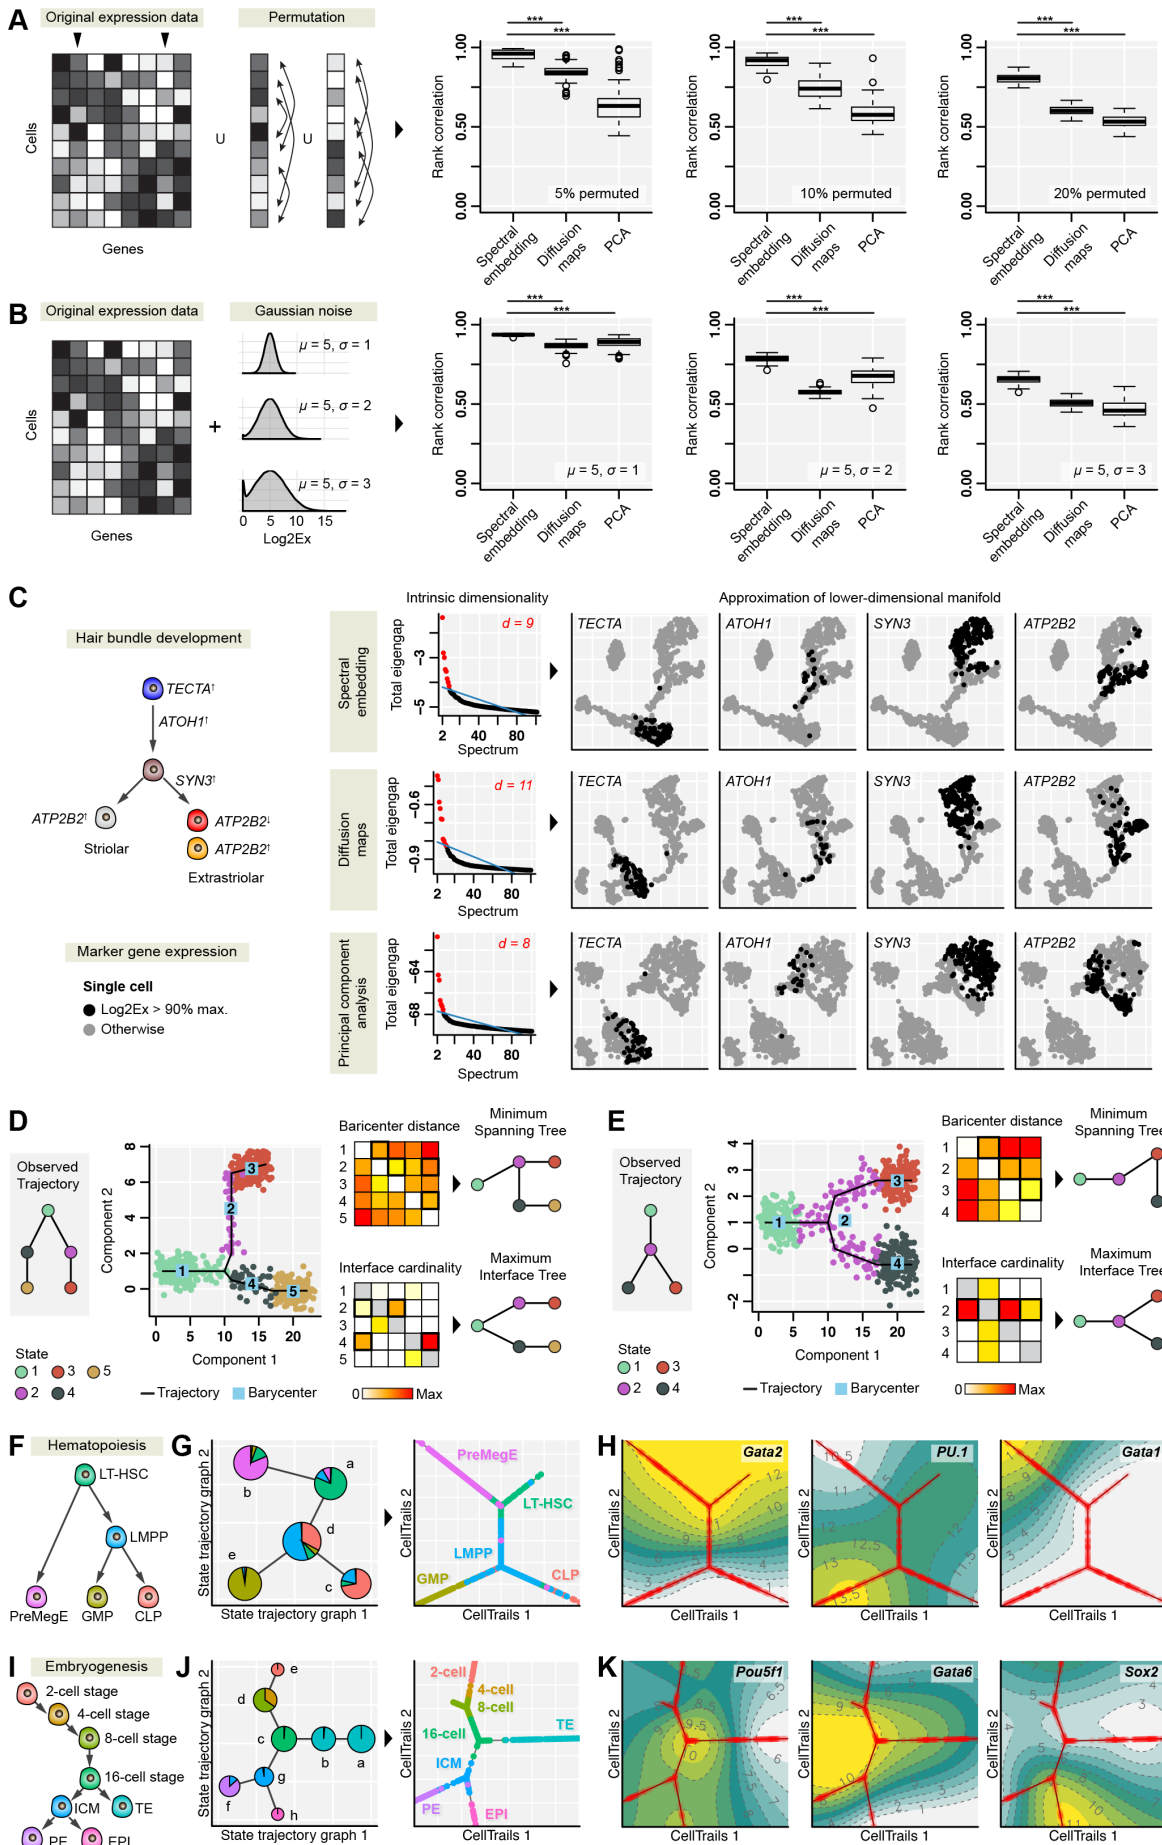



### Figure S7. Framework Assessment. Related to Figure 2

(A, B) Robustness analysis of spectral dimensionality reduction methods. Three noise levels were generated by sampling genes, shuffling the corresponding expression vectors, and by adding the permuted data to the original expression matrix, or by adding various degrees of Gaussian noise to the whole expression matrix (left panels). The absolute mean rank correlation between the top 10 reduced dimensions of the original data and the top 10 reduced dimensions of the data with a certain noise level was computed (right panels). The spectral embedding presented in this study shows significant higher robustness than diffusion maps, which were recently adapted for single-cell data analysis, and to the broadly used principal component analysis;  $n = 100$  repeats per noise level; \*\*\* Wilcoxon rank sum test  $P < 10^{-28}$ .

(C) Visualization of the lower-dimensional manifolds derived by spectral methods. The intrinsic dimensionality was determined using the total eigengap (middle panels). The respective lower-dimensional manifolds were approximated and plotted in two-dimensions using tSNE (right panels); cells with high marker expression are indicated. Spectral embedding and diffusion maps show a branching trajectory towards striolar and extrastriolar hair cells; diffusion maps missed to identify the hair cell subtype (with higher levels of *ATP2B2*) at the terminal end in the extrastriolar branch. The left panel shows gene expression information for markers that were validated biologically in our study.

(D, E) Data was simulated for a trajectory with 5 states (D) as well as a trajectory with 4 states (E). In both examples, minimizing the total centroid distance failed to identify the correct trajectory structure, while maximizing the total interface cardinality (i.e., the number of neighboring cells between states) succeeded.

(F-K) CellTrails analysis of other datasets. (F, I) The left panels show the schematic of expected development hierarchies (Guo et al., 2010; Moignard et al., 2013). For each dataset the cell identity was annotated in the respective study (e.g., by FACS), but the age was latent. (G, J) CellTrails identified 5 and 8 trajectory states for hematopoiesis and embryogenesis, respectively. Pie charts represent the distribution of metadata per state; states were connected according to the predicted trajectory. CellTrails correctly reconstructs the branching lineages and reveals lineage-specific expression dynamics of marker genes (H, K). For example, CellTrails maps delineate the mutual inhibitory expression pattern of the transcription factors *Gata1* and *PU.1* inducing hematopoietic progenitor lineage commitment, as well as reveal continuous *Gata2* expression during PreMegE maturation and loss of *Gata2* expression during differentiation of LMPP-derived cell types; LT-HSC = long-term hematopoietic stem cell, PreMegE = pre-megakaryocyte erythroid, LMPP = lymphoid-primed multi-potent progenitor, GMP = granulocyte-monocyte progenitor, CLP = common lymphoid progenitor.
